# Supplementary material for: Computational Study of Mechanism and Thermodynamics of Ni/IPr-Catalyzed Amidation of Esters
Source: PubMed Central journal article supplement (PMC6222384; doi:10.3390/molecules23102681), 2018-10-18
Supplement: molecules-23-02681-s001.pdf [file molecules-23-02681-s001.pdf]

**Supplemental Material**

**Computational study of mechanism and thermodynamics of Ni/IPr-catalyzed amidation of esters**

Chong-Lei Ji,<sup>†</sup> Pei-Pei Xie,<sup>†</sup> Xin Hong\*

Department of Chemistry, Zhejiang University, Hangzhou, 310027, China.

chjicl@zju.edu.cn (C. -L. J.); xppyyfd@zju.edu.cn (P. -P.; X.)

\* Correspondence: 0016011@zju.edu.cn (X. H.); Tel.: +86-571-88273191

<sup>†</sup> These authors contributed equally to this work.

**Contents**

|                                                                                                    |    |
|----------------------------------------------------------------------------------------------------|----|
| 1. Energy scan for the ligand exchange steps in Ni/IPr-catalyzed amidation of aromatic ester. .... | S2 |
| 2. Tables of energies. ....                                                                        | S2 |
| 3. Cartesian coordinates of the structures. ....                                                   | S9 |

## Energy scan for the ligand exchange steps in Ni/IPr-catalyzed amidation of aromatic ester.

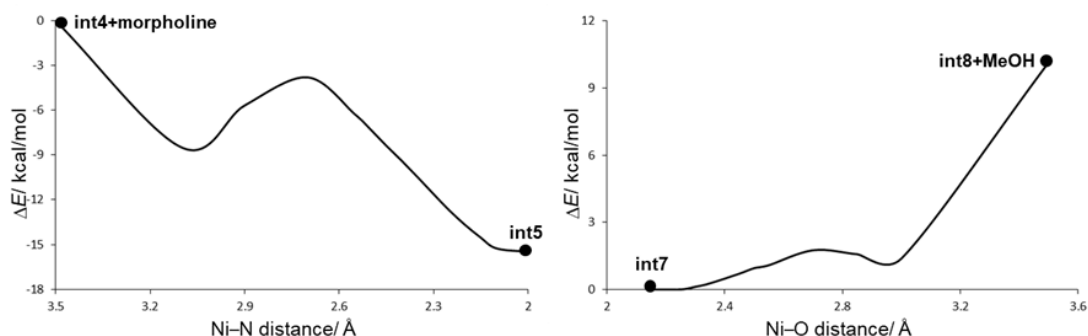

Figure S1. Energy scan for the ligand exchange steps (a) 4 to 5 (b) 7 to 8.

We were not able to locate the ligand exchange transition states due to the flat energy surface. A series of constrained optimizations were performed to explore the energy surface of ligand exchange processes, whose results corroborate the flat energy surface of ligand exchange. Therefore, the ligand exchange steps are not rate-determining for the catalytic cycle.

### Table of energies

Zero-point correction (*ZPE*), thermal correction to enthalpy (*TCH*), thermal correction to Gibbs free energy (*TCG*), energies (*E*), enthalpies (*H*), and Gibbs free energies (*G*) (in Hartree) of the structures calculated at the M06/6-311+G(d,p)-SDD-SMD(toluene)//B3LYP-D3(BJ)-SMD(toluene)/6-31G(d)-LANL2DZ level of theory.

Table S1. Energies in Figure 1, Figure 3, Figure 5

| Structures | <i>ZPE</i> | <i>tcH</i> | <i>tcG</i> | <i>E</i>     | <i>H</i>     | <i>G</i>     | Imaginary Frequency |
|------------|------------|------------|------------|--------------|--------------|--------------|---------------------|
| 1          | 0.703789   | 0.744124   | 0.630345   | -1601.888877 | -1601.144753 | -1601.258532 |                     |
| 2          | 0.719262   | 0.762449   | 0.642065   | -1790.423540 | -1789.661091 | -1789.781475 |                     |
| TS3        | 0.718634   | 0.760789   | 0.644939   | -1790.393962 | -1789.633173 | -1789.749023 | 253.9i              |
| 4          | 0.718753   | 0.761934   | 0.643570   | -1790.404970 | -1789.643036 | -1789.761400 |                     |
| 5          | 0.859096   | 0.907887   | 0.778662   | -2078.114782 | -2077.206895 | -2077.336120 |                     |
| TS6        | 0.853820   | 0.902451   | 0.773990   | -2078.107079 | -2077.204628 | -2077.333089 | 333.5i              |
| 7          | 0.855201   | 0.904713   | 0.773218   | -2078.107729 | -2077.203016 | -2077.334511 |                     |
| 8          | 0.801590   | 0.847692   | 0.721619   | -1962.400694 | -1961.553002 | -1961.679075 |                     |
| TS9        | 0.801073   | 0.846390   | 0.722552   | -1962.389309 | -1961.542919 | -1961.666757 | 187.1i              |
| 10         | 0.804009   | 0.849288   | 0.726642   | -1962.408755 | -1961.559467 | -1961.682113 |                     |
| 11         | 0.227419   | 0.240017   | 0.188542   | -631.941423  | -631.701406  | -631.752881  |                     |
| 12         | 0.778309   | 0.822935   | 0.701585   | -1869.002843 | -1868.179908 | -1868.301258 |                     |
| TS13       | 0.775525   | 0.820736   | 0.695454   | -1868.981477 | -1868.160741 | -1868.286023 | 190.9i              |
| 14         | 0.775505   | 0.821642   | 0.694221   | -1868.989665 | -1868.168023 | -1868.295444 |                     |
| 15         | 0.916319   | 0.967822   | 0.831251   | -2156.699659 | -2155.731837 | -2155.868408 |                     |
| TS16       | 0.910584   | 0.962250   | 0.824710   | -2156.684619 | -2155.722369 | -2155.859909 | 587.3i              |
| 17         | 0.913290   | 0.965641   | 0.826054   | -2156.686295 | -2155.720654 | -2155.860241 |                     |

|                                             |          |          |          |              |              |              |        |
|---------------------------------------------|----------|----------|----------|--------------|--------------|--------------|--------|
| 18                                          | 0.858166 | 0.907222 | 0.772672 | -2040.986045 | -2040.078823 | -2040.213373 |        |
| TS19                                        | 0.858436 | 0.906402 | 0.776103 | -2040.977149 | -2040.070747 | -2040.201046 | 160.8i |
| 20                                          | 0.860915 | 0.908837 | 0.777810 | -2040.991396 | -2040.082559 | -2040.213586 |        |
| 21                                          | 0.284678 | 0.300032 | 0.240004 | -710.528489  | -710.228457  | -710.288485  |        |
| 22                                          | 0.162149 | 0.172219 | 0.127052 | -478.116863  | -477.944644  | -477.989811  |        |
| 23                                          | 0.222158 | 0.234089 | 0.184482 | -556.741560  | -556.507471  | -556.557078  |        |
| 24                                          | 0.185336 | 0.196645 | 0.148253 | -479.371013  | -479.174368  | -479.174368  |        |
| 25                                          | 0.238793 | 0.252913 | 0.196520 | -670.999873  | -670.74696   | -670.803353  |        |
| 26                                          | 0.250644 | 0.264128 | 0.264128 | -596.035368  | -595.77124   | -595.77124   |        |
| 27                                          | 0.210073 | 0.222843 | 0.170505 | -631.716051  | -631.493208  | -631.545546  |        |
| 28                                          | 0.365631 | 0.388142 | 0.312856 | -1016.703675 | -1016.315533 | -1016.390819 |        |
| 29                                          | 0.194689 | 0.207702 | 0.155818 | -592.676185  | -592.468483  | -592.520367  |        |
| 30                                          | 0.203046 | 0.218159 | 0.160764 | -705.988867  | -705.770708  | -705.828103  |        |
| 31                                          | 0.237357 | 0.251839 | 0.195892 | -670.993371  | -670.741532  | -670.797479  |        |
| 32                                          | 0.327149 | 0.350027 | 0.272549 | -1450.472304 | -1450.122277 | -1450.199755 |        |
| 33                                          | 0.246217 | 0.262602 | 0.201615 | -784.305515  | -784.042913  | -784.103900  |        |
| 34                                          | 0.412550 | 0.435972 | 0.359238 | -1056.23664  | -1055.800668 | -1055.877402 |        |
| 35                                          | 0.552991 | 0.584995 | 0.486896 | -1382.091141 | -1381.506146 | -1381.604245 |        |
| 36                                          | 0.393956 | 0.417893 | 0.337180 | -1055.995283 | -1055.57739  | -1055.658103 |        |
| 37                                          | 0.207120 | 0.223976 | 0.162557 | -1292.358959 | -1292.134983 | -1292.196402 |        |
| 38                                          | 0.207121 | 0.222420 | 0.164342 | -857.139574  | -856.917154  | -856.975232  |        |
| 39                                          | 0.182902 | 0.196290 | 0.142096 | -704.79575   | -704.59946   | -704.653654  |        |
| 40                                          | 0.212479 | 0.226781 | 0.171000 | -744.087475  | -743.860694  | -743.916475  |        |
| a                                           | 0.051406 | 0.055647 | 0.028679 | -115.69086   | -115.635213  | -115.662181  |        |
| b                                           | 0.137677 | 0.145457 | 0.107544 | -233.571694  | -233.426237  | -233.46415   |        |
| c                                           | 0.114959 | 0.121556 | 0.086356 | -232.33765   | -232.216094  | -232.251294  |        |
| d                                           | 0.084984 | 0.090991 | 0.057711 | -193.044168  | -192.953177  | -192.986457  |        |
| e                                           | 0.133394 | 0.141493 | 0.101287 | -346.622518  | -346.481025  | -346.521231  |        |
| f                                           | 0.060800 | 0.066582 | 0.034141 | -191.795309  | -191.728727  | -191.761168  |        |
| g                                           | 0.102867 | 0.110308 | 0.071807 | -344.434472  | -344.324164  | -344.362665  |        |
| h                                           | 0.166403 | 0.177005 | 0.130763 | -461.115628  | -460.938623  | -460.984865  |        |
| i                                           | 0.108496 | 0.114853 | 0.081128 | -194.286212  | -194.171359  | -194.205084  |        |
| j                                           | 0.091537 | 0.097474 | 0.063585 | -268.246448  | -268.148974  | -268.182863  |        |
| k                                           | 0.214890 | 0.227311 | 0.175615 | -577.555081  | -577.32777   | -577.379466  |        |
| l                                           | 0.175555 | 0.183301 | 0.145267 | -310.964466  | -310.781165  | -310.819199  |        |
| m                                           | 0.136305 | 0.143928 | 0.107356 | -233.583873  | -233.439945  | -233.476517  |        |
| PhCOOMe                                     | 0.144266 | 0.154012 | 0.109810 | -459.947633  | -459.793621  | -459.837823  |        |
| PhMe                                        | 0.128400 | 0.135613 | 0.095906 | -271.415508  | -271.279895  | -271.319602  |        |
| Morpholine                                  | 0.136143 | 0.142356 | 0.107710 | -287.685128  | -287.542772  | -287.577418  |        |
| MeOH                                        | 0.051397 | 0.055637 | 0.028670 | -115.690860  | -115.635223  | -115.662190  |        |
| Ester product<br>of rxn between<br>22 and a | 0.144339 | 0.154048 | 0.109981 | -459.947635  | -459.793587  | -459.837654  |        |
| Ester product                               | 0.230012 | 0.243800 | 0.188839 | -577.827637  | -577.583837  | -577.638798  |        |

|                |          |          |          |             |             |             |
|----------------|----------|----------|----------|-------------|-------------|-------------|
| of rxn between |          |          |          |             |             |             |
| 22 and b       |          |          |          |             |             |             |
| Ester product  |          |          |          |             |             |             |
| of rxn between | 0.207401 | 0.219950 | 0.167927 | -576.593805 | -576.373855 | -576.425878 |
| 22 and c       |          |          |          |             |             |             |
| Ester product  |          |          |          |             |             |             |
| of rxn between | 0.177469 | 0.189359 | 0.138890 | -537.299785 | -537.110426 | -537.160895 |
| 22 and d       |          |          |          |             |             |             |
| Ester product  |          |          |          |             |             |             |
| of rxn between | 0.225742 | 0.239860 | 0.182658 | -690.877722 | -690.637862 | -690.695064 |
| 22 and e       |          |          |          |             |             |             |
| Ester product  |          |          |          |             |             |             |
| of rxn between | 0.153257 | 0.164861 | 0.115457 | -536.050193 | -535.885332 | -535.934736 |
| 22 and f       |          |          |          |             |             |             |
| Ester product  |          |          |          |             |             |             |
| of rxn between | 0.195425 | 0.208733 | 0.153809 | -688.690571 | -688.481838 | -688.536762 |
| 22 and g       |          |          |          |             |             |             |
| Ester product  |          |          |          |             |             |             |
| of rxn between | 0.258777 | 0.275409 | 0.212657 | -805.371889 | -805.09648  | -805.159232 |
| 22 and h       |          |          |          |             |             |             |
| Ester product  |          |          |          |             |             |             |
| of rxn between | 0.200985 | 0.213284 | 0.163052 | -538.537288 | -538.324004 | -538.374236 |
| 22 and i       |          |          |          |             |             |             |
| Ester product  |          |          |          |             |             |             |
| of rxn between | 0.184015 | 0.195979 | 0.145345 | -612.50048  | -612.304501 | -612.355135 |
| 22 and j       |          |          |          |             |             |             |
| Ester product  |          |          |          |             |             |             |
| of rxn between | 0.306809 | 0.325514 | 0.256863 | -921.807084 | -921.48157  | -921.550221 |
| 22 and k       |          |          |          |             |             |             |
| Ester product  |          |          |          |             |             |             |
| of rxn between | 0.267598 | 0.281829 | 0.225775 | -655.208738 | -654.926909 | -654.982963 |
| 22 and l       |          |          |          |             |             |             |
| Ester product  |          |          |          |             |             |             |
| of rxn between | 0.228608 | 0.242260 | 0.189398 | -577.939103 | -577.696843 | -577.749705 |
| 22 and m       |          |          |          |             |             |             |
| Ester product  |          |          |          |             |             |             |
| of rxn between | 0.190679 | 0.201511 | 0.154590 | -499.478449 | -499.276938 | -499.323859 |
| 34 and a       |          |          |          |             |             |             |
| Ester product  |          |          |          |             |             |             |
| of rxn between | 0.276570 | 0.291452 | 0.233537 | -617.35792  | -617.066468 | -617.124383 |
| 34 and b       |          |          |          |             |             |             |
| Ester product  |          |          |          |             |             |             |
| of rxn between | 0.253931 | 0.267598 | 0.212198 | -616.124014 | -615.856416 | -615.911816 |
| 34 and c       |          |          |          |             |             |             |

|                                             |          |          |          |              |              |              |
|---------------------------------------------|----------|----------|----------|--------------|--------------|--------------|
| Ester product<br>of rxn between<br>34 and d | 0.223917 | 0.236908 | 0.183646 | -576.830727  | -576.593819  | -576.647081  |
| Ester product<br>of rxn between<br>34 and e | 0.272132 | 0.287371 | 0.226588 | -730.408696  | -730.121325  | -730.182108  |
| Ester product<br>of rxn between<br>34 and f | 0.199954 | 0.212572 | 0.161100 | -575.580572  | -575.368000  | -575.419472  |
| Ester product<br>of rxn between<br>34 and g | 0.241935 | 0.256339 | 0.198799 | -728.220855  | -727.964516  | -728.022056  |
| Ester product<br>of rxn between<br>34 and h | 0.304996 | 0.322788 | 0.256848 | -844.902572  | -844.579784  | -844.645724  |
| Ester product<br>of rxn between<br>34 and i | 0.247656 | 0.261003 | 0.208341 | -578.067591  | -577.806588  | -577.85925   |
| Ester product<br>of rxn between<br>34 and j | 0.230246 | 0.243408 | 0.189052 | -652.031288  | -651.78788   | -651.842236  |
| Ester product<br>of rxn between<br>34 and k | 0.353321 | 0.373131 | 0.301614 | -961.33734   | -960.964209  | -961.035726  |
| Ester product<br>of rxn between<br>34 and l | 0.314062 | 0.329345 | 0.271033 | -694.739563  | -694.410218  | -694.46853   |
| Ester product<br>of rxn between<br>34 and m | 0.275189 | 0.289930 | 0.234539 | -617.364993  | -617.075063  | -617.130454  |
| Ester product<br>of rxn between<br>35 and a | 0.331327 | 0.350587 | 0.283064 | -825.333391  | -824.982804  | -825.050327  |
| Ester product<br>of rxn between<br>35 and b | 0.416971 | 0.440323 | 0.362179 | -943.213511  | -942.773188  | -942.851332  |
| Ester product<br>of rxn between<br>35 and c | 0.394266 | 0.416404 | 0.341053 | -941.979364  | -941.56296   | -941.638311  |
| Ester product<br>of rxn between<br>35 and d | 0.364393 | 0.385797 | 0.312948 | -902.685314  | -902.299517  | -902.372366  |
| Ester product<br>of rxn between             | 0.412810 | 0.436448 | 0.356513 | -1056.263697 | -1055.827249 | -1055.907184 |

|                |          |          |          |              |              |              |
|----------------|----------|----------|----------|--------------|--------------|--------------|
| 35 and e       |          |          |          |              |              |              |
| Ester product  |          |          |          |              |              |              |
| of rxn between | 0.340162 | 0.361327 | 0.288623 | -901.436199  | -901.074872  | -901.147576  |
| 35 and f       |          |          |          |              |              |              |
| Ester product  |          |          |          |              |              |              |
| of rxn between | 0.382207 | 0.405144 | 0.327082 | -1054.074361 | -1053.669217 | -1053.747279 |
| 35 and g       |          |          |          |              |              |              |
| Ester product  |          |          |          |              |              |              |
| of rxn between | 0.445652 | 0.471900 | 0.385989 | -1170.757233 | -1170.285333 | -1170.371244 |
| 35 and h       |          |          |          |              |              |              |
| Ester product  |          |          |          |              |              |              |
| of rxn between | 0.387944 | 0.409796 | 0.336557 | -903.922874  | -903.513078  | -903.586317  |
| 35 and i       |          |          |          |              |              |              |
| Ester product  |          |          |          |              |              |              |
| of rxn between | 0.370935 | 0.392449 | 0.318753 | -977.885931  | -977.493482  | -977.567178  |
| 35 and j       |          |          |          |              |              |              |
| Ester product  |          |          |          |              |              |              |
| of rxn between | 0.493925 | 0.522170 | 0.430743 | -1287.192365 | -1286.670195 | -1286.761622 |
| 35 and k       |          |          |          |              |              |              |
| Ester product  |          |          |          |              |              |              |
| of rxn between | 0.454526 | 0.478306 | 0.399277 | -1020.594246 | -1020.11594  | -1020.194969 |
| 35 and l       |          |          |          |              |              |              |
| Ester product  |          |          |          |              |              |              |
| of rxn between | 0.415560 | 0.438774 | 0.362617 | -943.22071   | -942.781936  | -942.858093  |
| 35 and m       |          |          |          |              |              |              |
| Ester product  |          |          |          |              |              |              |
| of rxn between | 0.172779 | 0.183950 | 0.134274 | -499.237142  | -499.053192  | -499.102868  |
| 36 and a       |          |          |          |              |              |              |
| Ester product  |          |          |          |              |              |              |
| of rxn between | 0.258476 | 0.273723 | 0.212272 | -617.117253  | -616.84353   | -616.904981  |
| 36 and b       |          |          |          |              |              |              |
| Ester product  |          |          |          |              |              |              |
| of rxn between | 0.235840 | 0.249816 | 0.192946 | -615.883466  | -615.63365   | -615.69052   |
| 36 and c       |          |          |          |              |              |              |
| Ester product  |          |          |          |              |              |              |
| of rxn between | 0.205964 | 0.219271 | 0.163938 | -576.5897    | -576.370429  | -576.425762  |
| 36 and d       |          |          |          |              |              |              |
| Ester product  |          |          |          |              |              |              |
| of rxn between | 0.254688 | 0.269898 | 0.210065 | -730.169014  | -729.899116  | -729.958949  |
| 36 and e       |          |          |          |              |              |              |
| Ester product  |          |          |          |              |              |              |
| of rxn between | 0.181728 | 0.194762 | 0.140275 | -575.340167  | -575.145405  | -575.199892  |
| 36 and f       |          |          |          |              |              |              |
| Ester product  |          |          |          |              |              |              |
| of rxn between | 0.223864 | 0.238615 | 0.177979 | -727.980222  | -727.741607  | -727.802243  |

|                                             |          |          |          |             |             |             |
|---------------------------------------------|----------|----------|----------|-------------|-------------|-------------|
| of rxn between<br>36 and g<br>Ester product | 0.287781 | 0.305367 | 0.241718 | -844.663679 | -844.358312 | -844.421961 |
| of rxn between<br>36 and h<br>Ester product | 0.229463 | 0.243168 | 0.187873 | -577.827566 | -577.584398 | -577.639693 |
| of rxn between<br>36 and i<br>Ester product | 0.212374 | 0.225827 | 0.169671 | -651.790247 | -651.56442  | -651.620576 |
| of rxn between<br>36 and j<br>Ester product | 0.335418 | 0.355393 | 0.283773 | -961.099938 | -960.744545 | -960.816165 |
| of rxn between<br>36 and k<br>Ester product | 0.296201 | 0.311763 | 0.251178 | -694.499069 | -694.187306 | -694.247891 |
| of rxn between<br>36 and l<br>Ester product | 0.257085 | 0.272142 | 0.214630 | -617.125326 | -616.853184 | -616.910696 |
| of rxn between<br>36 and m<br>Amine product | 0.070614 | 0.074784 | 0.046447 | -133.867327 | -133.792543 | -133.82088  |
| of rxn between<br>22 and a<br>Amine product | 0.130537 | 0.136455 | 0.101997 | -212.479452 | -212.342997 | -212.377455 |
| of rxn between<br>23 and a<br>Amine product | 0.135653 | 0.142257 | 0.106496 | -287.674602 | -287.532345 | -287.568106 |
| of rxn between<br>11 and a<br>Amine product | 0.093301 | 0.098606 | 0.067839 | -135.110938 | -135.012332 | -135.043099 |
| of rxn between<br>24 and a<br>Amine product | 0.146830 | 0.154931 | 0.114908 | -326.747009 | -326.592078 | -326.632101 |
| of rxn between<br>25 and a<br>Amine product | 0.158798 | 0.166086 | 0.128496 | -251.781497 | -251.615411 | -251.653001 |
| of rxn between<br>26 and a<br>Amine product | 0.117520 | 0.124220 | 0.088396 | -287.465663 | -287.341443 | -287.377267 |
| of rxn between<br>27 and a<br>Amine product | 0.274926 | 0.291062 | 0.230709 | -672.47301  | -672.181948 | -672.242301 |
| of rxn between<br>28 and a<br>Amine product |          |          |          |             |             |             |

|                |          |          |          |              |              |              |
|----------------|----------|----------|----------|--------------|--------------|--------------|
| Amine product  |          |          |          |              |              |              |
| of rxn between | 0.102466 | 0.110129 | 0.071393 | -248.441594  | -248.331465  | -248.370201  |
| 29 and a       |          |          |          |              |              |              |
| Amine product  |          |          |          |              |              |              |
| of rxn between | 0.112616 | 0.121511 | 0.079726 | -361.765339  | -361.643828  | -361.685613  |
| 30 and a       |          |          |          |              |              |              |
| Amine product  |          |          |          |              |              |              |
| of rxn between | 0.146142 | 0.154255 | 0.114912 | -326.747402  | -326.593147  | -326.63249   |
| 31 and a       |          |          |          |              |              |              |
| Amine product  |          |          |          |              |              |              |
| of rxn between | 0.236950 | 0.253134 | 0.191910 | -1106.239449 | -1105.986315 | -1106.047539 |
| 32 and a       |          |          |          |              |              |              |
| Amine product  |          |          |          |              |              |              |
| of rxn between | 0.155988 | 0.165851 | 0.121255 | -440.077631  | -439.91178   | -439.956376  |
| 33 and a       |          |          |          |              |              |              |
| Amine product  |          |          |          |              |              |              |
| of rxn between | 0.115962 | 0.126529 | 0.079767 | -948.127675  | -948.001146  | -948.047908  |
| 37 and a       |          |          |          |              |              |              |
| Amine product  |          |          |          |              |              |              |
| of rxn between | 0.116551 | 0.125311 | 0.083691 | -512.911664  | -512.786353  | 512.995355   |
| 38 and a       |          |          |          |              |              |              |
| Amine product  |          |          |          |              |              |              |
| of rxn between | 0.092595 | 0.099446 | 0.062329 | -360.568868  | -360.469422  | -360.506539  |
| 39 and a       |          |          |          |              |              |              |
| Amine product  |          |          |          |              |              |              |
| of rxn between | 0.122198 | 0.129965 | 0.090835 | -399.862546  | -399.732581  | -399.771711  |
| 40 and a       |          |          |          |              |              |              |

---

It should be noted that certain ester and amine products of the transformations are the same.



## Cartesian coordinates of the structures

**1**

|    |           |           |           |
|----|-----------|-----------|-----------|
| C  | -0.070358 | 0.167356  | -0.623938 |
| N  | 0.965700  | 0.366505  | -1.509211 |
| N  | -1.179146 | 0.297039  | -1.429009 |
| C  | 0.512785  | 0.609161  | -2.804131 |
| C  | 2.342896  | 0.297235  | -1.113917 |
| Ni | -0.037010 | -0.116926 | 1.210034  |
| C  | -0.842078 | 0.563822  | -2.753497 |
| C  | -2.516618 | 0.141405  | -0.935115 |
| H  | 1.191620  | 0.787205  | -3.623375 |
| C  | 2.977431  | -0.956338 | -1.108479 |
| C  | 2.991813  | 1.478179  | -0.711802 |
| H  | -1.591121 | 0.692437  | -3.519086 |
| C  | -3.212826 | 1.280750  | -0.493512 |
| C  | -3.070113 | -1.149493 | -0.889037 |
| C  | 2.264351  | -2.219466 | -1.568612 |
| C  | 4.295333  | -1.014648 | -0.641153 |
| C  | 2.277001  | 2.821323  | -0.720072 |
| C  | 4.309965  | 1.370296  | -0.255433 |
| C  | -2.570144 | 2.659374  | -0.505522 |
| C  | -4.501564 | 1.095888  | 0.018560  |
| C  | -2.297497 | -2.375148 | -1.351980 |
| C  | -4.363346 | -1.284229 | -0.370658 |
| C  | 3.082237  | -2.990559 | -2.616040 |
| C  | 1.905209  | -3.108583 | -0.368013 |
| H  | 1.324845  | -1.921089 | -2.042422 |
| C  | 4.953206  | 0.134947  | -0.211223 |
| H  | 4.808974  | -1.970800 | -0.609665 |
| C  | 3.135266  | 3.943167  | -1.322366 |
| C  | 1.799377  | 3.180183  | 0.696808  |
| H  | 1.385709  | 2.720935  | -1.346279 |
| H  | 4.836741  | 2.260198  | 0.075066  |
| C  | -2.073509 | 3.019294  | 0.905188  |
| C  | -3.500554 | 3.744672  | -1.065737 |
| H  | -1.691902 | 2.613923  | -1.155601 |
| C  | -5.072355 | -0.173900 | 0.081170  |
| H  | -5.062208 | 1.952573  | 0.379329  |
| C  | -3.051282 | -3.140771 | -2.450612 |
| C  | -1.961473 | -3.285015 | -0.159604 |
| H  | -1.349337 | -2.035802 | -1.777035 |
| H  | -4.815872 | -2.269953 | -0.316250 |
| H  | 3.339815  | -2.354135 | -3.470708 |

|          |           |           |           |
|----------|-----------|-----------|-----------|
| H        | 2.506329  | -3.845398 | -2.990110 |
| H        | 4.016067  | -3.382296 | -2.196586 |
| H        | 1.376971  | -4.010209 | -0.702122 |
| H        | 2.806066  | -3.423993 | 0.172804  |
| H        | 1.263400  | -2.564152 | 0.329257  |
| H        | 5.975060  | 0.069848  | 0.153085  |
| H        | 3.493280  | 3.680865  | -2.324682 |
| H        | 2.546543  | 4.864632  | -1.401788 |
| H        | 4.009925  | 4.168768  | -0.701691 |
| H        | 1.240016  | 4.123791  | 0.688038  |
| H        | 2.651308  | 3.296617  | 1.378494  |
| H        | 1.151361  | 2.389761  | 1.086965  |
| H        | -2.911872 | 3.083356  | 1.609856  |
| H        | -1.558521 | 3.987690  | 0.899492  |
| H        | -1.375687 | 2.254282  | 1.263435  |
| H        | -3.864835 | 3.483346  | -2.066074 |
| H        | -2.964083 | 4.698106  | -1.137473 |
| H        | -4.372956 | 3.909610  | -0.423090 |
| H        | -6.074107 | -0.297644 | 0.483879  |
| H        | -3.276438 | -2.492208 | -3.305280 |
| H        | -2.446489 | -3.981187 | -2.811640 |
| H        | -3.999453 | -3.549874 | -2.082396 |
| H        | -2.872335 | -3.657620 | 0.325001  |
| H        | -1.376355 | -4.151667 | -0.489962 |
| H        | -1.375092 | -2.735064 | 0.582968  |
| C        | 0.513269  | 0.504827  | 3.106795  |
| C        | -0.523893 | -0.475525 | 3.132786  |
| C        | 1.875289  | 0.110547  | 3.081787  |
| H        | 0.267155  | 1.552720  | 3.260477  |
| C        | -1.959949 | -0.113532 | 3.428028  |
| C        | -0.124698 | -1.842572 | 3.054594  |
| C        | 2.228231  | -1.234410 | 3.091873  |
| H        | 2.645127  | 0.876818  | 3.065430  |
| H        | -2.650289 | -0.715817 | 2.826421  |
| H        | -2.158194 | 0.938569  | 3.204629  |
| H        | -2.204673 | -0.283444 | 4.487236  |
| C        | 1.219119  | -2.213783 | 3.068064  |
| H        | -0.896182 | -2.609065 | 3.048613  |
| H        | 3.274419  | -1.525341 | 3.075429  |
| H        | 1.484532  | -3.266917 | 3.032798  |
| <b>2</b> |           |           |           |
| C        | -0.819871 | 0.251926  | 0.580363  |
| N        | -0.083982 | 0.765004  | 1.620781  |

|    |           |           |           |
|----|-----------|-----------|-----------|
| N  | -2.081993 | 0.169040  | 1.113969  |
| C  | -0.865088 | 1.002370  | 2.748360  |
| C  | 1.314768  | 1.069087  | 1.509476  |
| Ni | -0.293527 | -0.189398 | -1.169766 |
| C  | -2.128027 | 0.623317  | 2.429442  |
| C  | -3.217143 | -0.297818 | 0.370439  |
| H  | -0.448545 | 1.412708  | 3.654849  |
| C  | 1.689053  | 2.312053  | 0.972916  |
| C  | 2.252115  | 0.098979  | 1.905693  |
| H  | -3.043278 | 0.629059  | 3.000182  |
| C  | -3.561233 | -1.658886 | 0.445454  |
| C  | -3.931664 | 0.624491  | -0.414136 |
| C  | 0.664764  | 3.368497  | 0.585864  |
| C  | 3.055622  | 2.556872  | 0.796233  |
| C  | 1.815752  | -1.240865 | 2.479989  |
| C  | 3.605557  | 0.389702  | 1.706954  |
| C  | -2.735722 | -2.647799 | 1.255336  |
| C  | -4.660615 | -2.091656 | -0.304467 |
| C  | -3.519305 | 2.085325  | -0.512858 |
| C  | -5.021918 | 0.143433  | -1.147898 |
| C  | 0.882545  | 4.670582  | 1.373382  |
| C  | 0.671524  | 3.620981  | -0.929490 |
| H  | -0.327575 | 2.990245  | 0.845314  |
| C  | 4.004481  | 1.601243  | 1.147019  |
| H  | 3.377586  | 3.501174  | 0.367582  |
| C  | 2.688200  | -1.693257 | 3.659820  |
| C  | 1.782306  | -2.307849 | 1.373379  |
| H  | 0.794133  | -1.126776 | 2.856031  |
| H  | 4.355007  | -0.344997 | 1.982769  |
| C  | -1.820562 | -3.456763 | 0.319762  |
| C  | -3.602487 | -3.570175 | 2.124257  |
| H  | -2.089002 | -2.076594 | 1.927178  |
| C  | -5.384395 | -1.200477 | -1.093749 |
| H  | -4.949485 | -3.137688 | -0.275150 |
| C  | -2.855354 | 2.358767  | -1.872932 |
| C  | -4.694790 | 3.040944  | -0.259816 |
| H  | -2.768215 | 2.277227  | 0.258377  |
| H  | -5.589788 | 0.828067  | -1.770556 |
| H  | 0.859641  | 4.490079  | 2.454446  |
| H  | 0.097289  | 5.397404  | 1.132967  |
| H  | 1.847099  | 5.132053  | 1.131892  |
| H  | 1.649337  | 3.981478  | -1.270673 |
| H  | 0.437939  | 2.697333  | -1.464904 |
| H  | -0.077039 | 4.377107  | -1.195629 |

|   |           |           |           |
|---|-----------|-----------|-----------|
| H | 5.058530  | 1.797891  | 0.977922  |
| H | 2.268256  | -2.600860 | 4.108930  |
| H | 2.746067  | -0.923745 | 4.438426  |
| H | 3.710805  | -1.930974 | 3.344719  |
| H | 2.777761  | -2.452008 | 0.938983  |
| H | 1.436657  | -3.268961 | 1.774739  |
| H | 1.111218  | -2.003358 | 0.566284  |
| H | -2.411819 | -4.055162 | -0.384695 |
| H | -1.184061 | -4.139267 | 0.895717  |
| H | -1.175193 | -2.787488 | -0.258149 |
| H | -4.267574 | -2.995395 | 2.779110  |
| H | -2.965032 | -4.200212 | 2.755574  |
| H | -4.223582 | -4.239071 | 1.517720  |
| H | -6.234349 | -1.555573 | -1.670256 |
| H | -3.554771 | 2.173158  | -2.697403 |
| H | -1.984388 | 1.705892  | -2.004595 |
| H | -2.521422 | 3.401190  | -1.937393 |
| H | -5.166136 | 2.846670  | 0.710607  |
| H | -4.344081 | 4.079674  | -0.265434 |
| H | -5.467595 | 2.951270  | -1.031908 |
| C | -0.055589 | -0.910131 | -3.002384 |
| C | 0.594995  | -2.099721 | -2.555999 |
| C | 0.662331  | 0.320158  | -2.936401 |
| H | -1.008050 | -0.974890 | -3.523224 |
| C | 1.914749  | -2.076535 | -2.125925 |
| H | 0.057423  | -3.042954 | -2.593672 |
| C | 1.991955  | 0.329012  | -2.465255 |
| H | 0.244313  | 1.226132  | -3.365720 |
| C | 2.634301  | -0.857303 | -2.093520 |
| H | 2.399544  | -2.990211 | -1.803394 |
| H | 2.543039  | 1.260731  | -2.402060 |
| C | 4.030175  | -0.771145 | -1.628776 |
| O | 4.468352  | -1.935130 | -1.077507 |
| O | 4.743969  | 0.214858  | -1.714736 |
| C | 5.823142  | -1.919461 | -0.617767 |
| H | 5.965052  | -1.157069 | 0.153255  |
| H | 6.513737  | -1.720658 | -1.442809 |
| H | 6.005121  | -2.913016 | -0.204408 |

### TS3

|    |           |           |           |
|----|-----------|-----------|-----------|
| Ni | -0.480931 | -0.231403 | 1.140829  |
| C  | -0.517143 | 0.258116  | -0.659633 |
| C  | 1.038236  | 0.133988  | 2.208567  |
| N  | 0.348480  | 0.780146  | -1.576409 |

|   |           |           |           |
|---|-----------|-----------|-----------|
| N | -1.686392 | 0.129981  | -1.358430 |
| O | -0.337393 | -0.674323 | 2.967884  |
| C | 2.081657  | -0.925426 | 2.036521  |
| O | 1.279263  | 1.271610  | 2.591375  |
| C | -0.271712 | 0.967284  | -2.813352 |
| C | 1.728199  | 1.105854  | -1.325441 |
| C | -1.556790 | 0.555926  | -2.675632 |
| C | -2.883645 | -0.354642 | -0.729383 |
| C | -1.014820 | 0.161653  | 3.891813  |
| C | 3.359761  | -0.499212 | 1.651437  |
| C | 1.831041  | -2.297427 | 2.188212  |
| H | 0.262441  | 1.374169  | -3.657082 |
| C | 2.714394  | 0.236243  | -1.826216 |
| C | 2.027330  | 2.292068  | -0.629714 |
| H | -2.380475 | 0.527672  | -3.371323 |
| C | -3.117162 | -1.740765 | -0.702663 |
| C | -3.736703 | 0.578071  | -0.110180 |
| H | -0.611579 | 1.182364  | 3.861989  |
| H | -0.872641 | -0.242384 | 4.903742  |
| H | -2.089753 | 0.191681  | 3.671272  |
| C | 4.374785  | -1.428183 | 1.426304  |
| H | 3.542070  | 0.561211  | 1.523974  |
| C | 2.851490  | -3.221592 | 1.974384  |
| H | 0.844427  | -2.623373 | 2.492949  |
| C | 2.331826  | -1.069401 | -2.513147 |
| C | 4.051137  | 0.598020  | -1.627353 |
| C | 0.922875  | 3.208341  | -0.116733 |
| C | 3.380673  | 2.604397  | -0.455541 |
| C | -2.143332 | -2.732233 | -1.321642 |
| C | -4.262270 | -2.188523 | -0.033773 |
| C | -3.416838 | 2.065887  | -0.094558 |
| C | -4.866947 | 0.080002  | 0.546591  |
| C | 4.126336  | -2.792104 | 1.591334  |
| H | 5.359694  | -1.084565 | 1.121573  |
| H | 2.652681  | -4.281613 | 2.109073  |
| C | 3.401383  | -1.590415 | -3.480548 |
| C | 1.986344  | -2.144413 | -1.465742 |
| H | 1.426926  | -0.884850 | -3.102475 |
| C | 4.380115  | 1.771941  | -0.954243 |
| H | 4.842167  | -0.045184 | -1.996034 |
| C | 1.359804  | 4.097525  | 1.052187  |
| C | 0.352008  | 4.073047  | -1.256667 |
| H | 0.123089  | 2.563874  | 0.258266  |
| H | 3.656351  | 3.506353  | 0.078728  |

|          |           |           |           |
|----------|-----------|-----------|-----------|
| C        | -2.839932 | -3.702546 | -2.287055 |
| C        | -1.380759 | -3.487941 | -0.219447 |
| H        | -1.405230 | -2.167872 | -1.898248 |
| C        | -5.128200 | -1.288609 | 0.583068  |
| H        | -4.471711 | -3.252800 | 0.012447  |
| C        | -4.624266 | 2.930426  | -0.484685 |
| C        | -2.856845 | 2.474971  | 1.279281  |
| H        | -2.631025 | 2.250943  | -0.832352 |
| H        | -5.544389 | 0.768790  | 1.041521  |
| H        | 4.918144  | -3.517044 | 1.421962  |
| H        | 4.300343  | -1.925325 | -2.950611 |
| H        | 3.699634  | -0.828667 | -4.210141 |
| H        | 3.011497  | -2.453586 | -4.031660 |
| H        | 2.865871  | -2.392856 | -0.864770 |
| H        | 1.639810  | -3.059343 | -1.962392 |
| H        | 1.205051  | -1.804940 | -0.782308 |
| H        | 5.424152  | 2.035955  | -0.808357 |
| H        | 0.485726  | 4.623018  | 1.454177  |
| H        | 2.082421  | 4.862225  | 0.741393  |
| H        | 1.791487  | 3.497823  | 1.856117  |
| H        | -0.469232 | 4.697739  | -0.884497 |
| H        | 1.124084  | 4.739092  | -1.661835 |
| H        | -0.036246 | 3.468272  | -2.081508 |
| H        | -3.378059 | -3.163941 | -3.075618 |
| H        | -2.099997 | -4.355369 | -2.764640 |
| H        | -3.559844 | -4.345753 | -1.768394 |
| H        | -0.847759 | -2.786140 | 0.432737  |
| H        | -2.066088 | -4.075974 | 0.402781  |
| H        | -0.645490 | -4.172431 | -0.658012 |
| H        | -6.010258 | -1.656090 | 1.100275  |
| H        | -5.028871 | 2.635779  | -1.459786 |
| H        | -4.327655 | 3.983966  | -0.543469 |
| H        | -5.433446 | 2.858865  | 0.250839  |
| H        | -2.572414 | 3.534121  | 1.279786  |
| H        | -3.602180 | 2.322614  | 2.069275  |
| H        | -1.969408 | 1.881700  | 1.529132  |
| <b>4</b> |           |           |           |
| Ni       | 0.406054  | -0.760925 | -0.956524 |
| C        | -1.065138 | 0.030014  | -1.731373 |
| C        | 0.590114  | 0.400440  | 0.533122  |
| C        | -2.331082 | -0.771356 | -1.817601 |
| O        | -0.996842 | 1.162073  | -2.179185 |
| O        | 0.701774  | -2.101992 | -2.105963 |

|   |           |           |           |
|---|-----------|-----------|-----------|
| N | -0.246527 | 1.013943  | 1.416568  |
| N | 1.835520  | 0.683481  | 1.012998  |
| C | -3.549006 | -0.091042 | -1.967167 |
| C | -2.323006 | -2.170595 | -1.744165 |
| C | 0.805030  | -1.956349 | -3.491550 |
| C | 0.464398  | 1.649750  | 2.431787  |
| C | -1.681437 | 0.913590  | 1.381855  |
| C | 1.780847  | 1.440467  | 2.177010  |
| C | 3.037029  | 0.201111  | 0.383943  |
| C | -4.746447 | -0.799739 | -2.010991 |
| H | -3.542197 | 0.990595  | -2.032151 |
| C | -3.523019 | -2.877689 | -1.807802 |
| H | -1.364860 | -2.677527 | -1.676921 |
| H | -0.185578 | -1.880956 | -3.977192 |
| H | 1.387242  | -1.069409 | -3.798220 |
| H | 1.305654  | -2.839899 | -3.923253 |
| H | -0.035015 | 2.171903  | 3.231262  |
| C | -2.273619 | -0.247325 | 1.907589  |
| C | -2.424637 | 1.977480  | 0.840022  |
| H | 2.671900  | 1.752148  | 2.698502  |
| C | 3.458664  | -1.111449 | 0.657567  |
| C | 3.717451  | 1.057476  | -0.501184 |
| C | -4.735848 | -2.194888 | -1.927586 |
| H | -5.688465 | -0.266675 | -2.109231 |
| H | -3.511916 | -3.963504 | -1.763696 |
| C | -1.449195 | -1.361295 | 2.538557  |
| C | -3.668081 | -0.344204 | 1.843240  |
| C | -1.750991 | 3.241980  | 0.325757  |
| C | -3.816696 | 1.843837  | 0.828547  |
| C | 2.697430  | -2.038316 | 1.594923  |
| C | 4.627469  | -1.555453 | 0.027509  |
| C | 3.174378  | 2.436512  | -0.845611 |
| C | 4.875781  | 0.563348  | -1.108584 |
| H | -5.670738 | -2.748272 | -1.962979 |
| C | -1.979396 | -1.745573 | 3.929217  |
| C | -1.366547 | -2.587275 | 1.616866  |
| H | -0.429316 | -0.989582 | 2.676590  |
| C | -4.431452 | 0.690921  | 1.312414  |
| H | -4.159172 | -1.236942 | 2.217018  |
| C | -2.394993 | 3.792987  | -0.953804 |
| C | -1.734944 | 4.322274  | 1.423252  |
| H | -0.716523 | 2.986461  | 0.079207  |
| H | -4.426143 | 2.642642  | 0.419314  |
| C | 3.490931  | -2.284806 | 2.888654  |

|   |           |           |           |
|---|-----------|-----------|-----------|
| C | 2.330827  | -3.360971 | 0.901360  |
| H | 1.760682  | -1.548516 | 1.874416  |
| C | 5.329257  | -0.727896 | -0.843380 |
| H | 4.984693  | -2.562662 | 0.217293  |
| C | 4.276465  | 3.494652  | -0.996448 |
| C | 2.306449  | 2.357894  | -2.115850 |
| H | 2.525323  | 2.759745  | -0.025470 |
| H | 5.425934  | 1.190148  | -1.802422 |
| H | -2.972101 | -2.206304 | 3.875113  |
| H | -2.049835 | -0.871277 | 4.586459  |
| H | -1.306220 | -2.471749 | 4.399764  |
| H | -2.363181 | -2.983026 | 1.391797  |
| H | -0.780532 | -3.383563 | 2.090893  |
| H | -0.888397 | -2.325221 | 0.668449  |
| H | -5.512911 | 0.597411  | 1.270261  |
| H | -1.813329 | 4.648084  | -1.317563 |
| H | -3.417933 | 4.147349  | -0.780781 |
| H | -2.406310 | 3.035393  | -1.740553 |
| H | -1.211931 | 5.219475  | 1.071317  |
| H | -2.757008 | 4.611769  | 1.696315  |
| H | -1.234137 | 3.975158  | 2.333113  |
| H | 3.710804  | -1.344448 | 3.407435  |
| H | 2.919755  | -2.924590 | 3.571915  |
| H | 4.445076  | -2.783483 | 2.680820  |
| H | 3.225294  | -3.948276 | 0.662597  |
| H | 1.786074  | -3.184789 | -0.032023 |
| H | 1.703372  | -3.970418 | 1.562028  |
| H | 6.232215  | -1.092206 | -1.325516 |
| H | 4.930283  | 3.526292  | -0.117134 |
| H | 3.825243  | 4.485579  | -1.120970 |
| H | 4.902765  | 3.312069  | -1.876908 |
| H | 2.901499  | 2.006075  | -2.967465 |
| H | 1.907469  | 3.348622  | -2.366369 |
| H | 1.458626  | 1.678573  | -1.988722 |

**5**

|    |           |           |           |
|----|-----------|-----------|-----------|
| C  | 0.116687  | -0.993275 | 0.465901  |
| N  | 1.241929  | -1.673863 | 0.826596  |
| N  | -0.893532 | -1.672842 | 1.090396  |
| C  | 0.938737  | -2.763118 | 1.644819  |
| C  | 2.534971  | -1.449052 | 0.235445  |
| Ni | -0.268239 | 0.532158  | -0.592413 |
| C  | -0.404620 | -2.761282 | 1.809658  |
| C  | -2.297260 | -1.394462 | 0.905524  |



|   |           |           |           |
|---|-----------|-----------|-----------|
| H | 1.702779  | -3.433461 | 2.003184  |
| C | 2.854607  | -2.186782 | -0.918262 |
| C | 3.413463  | -0.516746 | 0.820173  |
| C | 0.155129  | 1.693894  | 0.821333  |
| H | -1.057736 | -3.424116 | 2.352085  |
| C | -2.995220 | -0.698327 | 1.908649  |
| C | -2.916064 | -1.865774 | -0.271885 |
| C | 1.973851  | -3.317134 | -1.439752 |
| C | 4.070324  | -1.896851 | -1.550834 |
| C | 3.089459  | 0.153076  | 2.150524  |
| C | 4.619130  | -0.273405 | 0.154061  |
| C | 1.320527  | 2.595062  | 0.449888  |
| O | -0.422174 | 1.892882  | 1.885517  |
| C | -2.328594 | -0.268574 | 3.206782  |
| C | -4.356863 | -0.450137 | 1.692846  |
| C | -2.161276 | -2.706883 | -1.292392 |
| C | -4.276932 | -1.583948 | -0.437680 |
| C | 1.392294  | -3.029885 | -2.831030 |
| C | 2.748816  | -4.646792 | -1.415202 |
| H | 1.123864  | -3.430579 | -0.762743 |
| C | 4.934975  | -0.939534 | -1.029724 |
| H | 4.340606  | -2.433382 | -2.455382 |
| C | 3.895324  | 1.431838  | 2.410697  |
| C | 3.311982  | -0.828633 | 3.318335  |
| H | 2.028831  | 0.421346  | 2.141460  |
| H | 5.316042  | 0.451552  | 0.558094  |
| C | 2.166141  | 2.275069  | -0.620096 |
| C | 1.530350  | 3.788367  | 1.155124  |
| C | -2.812624 | 1.100996  | 3.701694  |
| C | -2.550160 | -1.331941 | 4.299097  |
| H | -1.257659 | -0.177714 | 3.014625  |
| C | -4.990011 | -0.880068 | 0.530816  |
| H | -4.924322 | 0.089253  | 2.443635  |
| C | -2.649607 | -2.507922 | -2.731067 |
| C | -2.221447 | -4.194022 | -0.896923 |
| H | -1.121030 | -2.380931 | -1.287034 |
| H | -4.785458 | -1.923054 | -1.333251 |
| H | 2.178000  | -2.789751 | -3.557509 |
| H | 0.860130  | -3.915760 | -3.200224 |
| H | 0.684952  | -2.198040 | -2.777368 |
| H | 3.156932  | -4.858084 | -0.419720 |
| H | 3.585622  | -4.639004 | -2.123164 |
| H | 2.085601  | -5.474106 | -1.694174 |
| H | 5.871334  | -0.722470 | -1.536746 |

|   |           |           |           |
|---|-----------|-----------|-----------|
| H | 3.487428  | 1.948253  | 3.285986  |
| H | 4.946945  | 1.205197  | 2.626351  |
| H | 3.860506  | 2.122792  | 1.566738  |
| H | 3.087065  | -0.336524 | 4.271941  |
| H | 4.355856  | -1.163884 | 3.347099  |
| H | 2.673583  | -1.712360 | 3.243635  |
| C | 3.207861  | 3.130188  | -0.979401 |
| H | 2.013458  | 1.345096  | -1.160322 |
| C | 2.562106  | 4.650565  | 0.791625  |
| H | 0.870293  | 4.017986  | 1.986116  |
| H | -2.202000 | 1.420102  | 4.553841  |
| H | -3.855200 | 1.071388  | 4.040642  |
| H | -2.712652 | 1.856187  | 2.919705  |
| H | -2.052297 | -1.033287 | 5.229466  |
| H | -3.619252 | -1.454659 | 4.512079  |
| H | -2.156041 | -2.310799 | 4.007677  |
| H | -6.046147 | -0.672105 | 0.380611  |
| H | -2.002720 | -3.072255 | -3.412094 |
| H | -3.674622 | -2.868202 | -2.883342 |
| H | -2.576608 | -1.454470 | -3.009482 |
| H | -1.642186 | -4.799598 | -1.604425 |
| H | -3.255493 | -4.561317 | -0.905599 |
| H | -1.813265 | -4.367107 | 0.104231  |
| C | 3.404058  | 4.321926  | -0.276763 |
| H | 3.868148  | 2.863022  | -1.799879 |
| H | 2.716759  | 5.576850  | 1.338941  |
| H | 4.211716  | 4.992572  | -0.558010 |
| N | -1.414881 | 1.984108  | -1.462337 |
| C | -0.985953 | 3.359245  | -1.787107 |
| C | -2.728045 | 1.997953  | -0.774745 |
| H | -1.500557 | 1.416082  | -2.313709 |
| C | -2.075046 | 4.102511  | -2.554443 |
| H | -0.059922 | 3.315487  | -2.365698 |
| H | -0.774778 | 3.877504  | -0.847255 |
| C | -3.754721 | 2.797886  | -1.568546 |
| H | -3.062126 | 0.966393  | -0.646432 |
| H | -2.581313 | 2.438483  | 0.215403  |
| O | -3.299167 | 4.120679  | -1.830630 |
| H | -1.789945 | 5.146700  | -2.715579 |
| H | -2.227387 | 3.628758  | -3.540597 |
| H | -4.687860 | 2.891516  | -1.004801 |
| H | -3.975432 | 2.282038  | -2.519824 |
| C | 0.417949  | 0.172953  | -3.285375 |
| H | 0.222344  | -0.241995 | -4.293287 |

|   |           |           |           |
|---|-----------|-----------|-----------|
| H | 1.479763  | -0.056110 | -3.060010 |
| H | 0.371325  | 1.280099  | -3.403333 |
| O | -0.483103 | -0.339020 | -2.357155 |

**TS6**

|    |           |           |           |
|----|-----------|-----------|-----------|
| C  | -0.304724 | -1.071160 | 0.053948  |
| N  | 0.641931  | -2.053692 | 0.045866  |
| N  | -1.467227 | -1.742877 | 0.313358  |
| C  | 0.080397  | -3.308709 | 0.271875  |
| C  | 2.058905  | -1.841613 | -0.087570 |
| Ni | -0.298832 | 0.801555  | -0.263481 |
| C  | -1.247677 | -3.110965 | 0.447913  |
| C  | -2.755306 | -1.126868 | 0.514706  |
| H  | 0.679939  | -4.203523 | 0.288851  |
| C  | 2.622564  | -1.828219 | -1.374138 |
| C  | 2.819242  | -1.681753 | 1.085657  |
| C  | 0.968519  | 1.267856  | 1.004193  |
| H  | -2.050114 | -3.796398 | 0.664812  |
| C  | -3.721906 | -1.243289 | -0.497488 |
| C  | -2.999354 | -0.463961 | 1.735634  |
| C  | 1.764227  | -2.021312 | -2.615459 |
| C  | 4.006714  | -1.654109 | -1.469758 |
| C  | 2.183053  | -1.757780 | 2.468023  |
| C  | 4.197873  | -1.496360 | 0.934177  |
| C  | 2.315103  | 1.679223  | 0.460262  |
| O  | 0.752050  | 1.360347  | 2.207649  |
| C  | -3.433906 | -1.942555 | -1.817145 |
| C  | -4.986017 | -0.694111 | -0.251860 |
| C  | -1.934385 | -0.366497 | 2.821318  |
| C  | -4.274769 | 0.080687  | 1.921662  |
| C  | 2.197162  | -1.134266 | -3.790982 |
| C  | 1.744863  | -3.502241 | -3.034383 |
| H  | 0.740943  | -1.737489 | -2.355627 |
| C  | 4.785196  | -1.483946 | -0.327843 |
| H  | 4.478504  | -1.633643 | -2.446584 |
| C  | 2.809526  | -0.791941 | 3.481816  |
| C  | 2.245693  | -3.198755 | 3.009135  |
| H  | 1.130644  | -1.479501 | 2.366571  |
| H  | 4.817694  | -1.353471 | 1.812403  |
| C  | 2.643896  | 1.462231  | -0.880928 |
| C  | 3.239882  | 2.323565  | 1.294398  |
| C  | -3.962859 | -1.147015 | -3.020643 |
| C  | -4.010542 | -3.369633 | -1.824406 |
| H  | -2.347557 | -2.012938 | -1.922751 |

|   |           |           |           |
|---|-----------|-----------|-----------|
| C | -5.260407 | -0.038230 | 0.943343  |
| H | -5.757315 | -0.770704 | -1.011298 |
| C | -2.132563 | 0.822073  | 3.768119  |
| C | -1.844769 | -1.675736 | 3.627985  |
| H | -0.971889 | -0.198708 | 2.335128  |
| H | -4.501701 | 0.602812  | 2.844102  |
| H | 1.469293  | -1.213350 | -4.606319 |
| H | 3.170510  | -1.434747 | -4.194965 |
| H | 2.262849  | -0.081507 | -3.498313 |
| H | 1.100702  | -3.647675 | -3.909963 |
| H | 2.753088  | -3.847438 | -3.293350 |
| H | 1.368127  | -4.140765 | -2.228469 |
| H | 5.856653  | -1.331757 | -0.422508 |
| H | 2.226434  | -0.810774 | 4.409619  |
| H | 3.837245  | -1.075793 | 3.737197  |
| H | 2.807682  | 0.232846  | 3.107753  |
| H | 1.750397  | -3.259376 | 3.985453  |
| H | 3.286871  | -3.519382 | 3.136046  |
| H | 1.755136  | -3.911111 | 2.339313  |
| C | 3.878820  | 1.866258  | -1.384314 |
| H | 1.920211  | 0.967525  | -1.522328 |
| C | 4.473923  | 2.732853  | 0.795444  |
| H | 2.965545  | 2.502256  | 2.329219  |
| H | -5.057601 | -1.169534 | -3.074159 |
| H | -3.584682 | -1.582707 | -3.953260 |
| H | -3.637118 | -0.106644 | -2.960828 |
| H | -5.101223 | -3.348305 | -1.711172 |
| H | -3.780382 | -3.873006 | -2.771296 |
| H | -3.604946 | -3.980729 | -1.011313 |
| H | -6.245375 | 0.387855  | 1.114285  |
| H | -1.250973 | 0.922431  | 4.408582  |
| H | -3.004784 | 0.693768  | 4.421254  |
| H | -2.247220 | 1.759535  | 3.215909  |
| H | -1.055823 | -1.597864 | 4.385880  |
| H | -2.790613 | -1.881768 | 4.144724  |
| H | -1.613324 | -2.536736 | 2.993681  |
| C | 4.796474  | 2.503025  | -0.545916 |
| H | 4.128752  | 1.680224  | -2.425264 |
| H | 5.184588  | 3.235178  | 1.446584  |
| H | 5.759605  | 2.821718  | -0.935852 |
| N | -0.769180 | 2.662247  | -0.568159 |
| C | 0.151629  | 3.720336  | -0.967674 |
| C | -1.663625 | 3.151329  | 0.482887  |
| C | -0.625083 | 4.958775  | -1.412172 |

|    |           |           |           |
|----|-----------|-----------|-----------|
| H  | 0.786862  | 3.369735  | -1.788478 |
| H  | 0.818667  | 4.006997  | -0.137223 |
| C  | -2.398678 | 4.408306  | 0.019615  |
| H  | -2.395921 | 2.373319  | 0.729112  |
| H  | -1.100378 | 3.382393  | 1.402308  |
| O  | -1.487459 | 5.426477  | -0.381280 |
| H  | 0.052577  | 5.786829  | -1.647548 |
| H  | -1.215920 | 4.719386  | -2.314394 |
| H  | -3.001527 | 4.834450  | 0.828994  |
| H  | -3.068422 | 4.154742  | -0.821032 |
| C  | -0.986277 | 0.638564  | -3.154881 |
| H  | -0.875345 | -0.435513 | -3.339238 |
| H  | -1.574722 | 1.065158  | -3.980468 |
| H  | 0.015737  | 1.094568  | -3.181544 |
| O  | -1.634554 | 0.840421  | -1.912555 |
| H  | -1.446915 | 1.873560  | -1.560035 |
| 7  |           |           |           |
| Ni | -0.304071 | 0.797693  | -0.277919 |
| C  | 0.947837  | 1.288581  | 0.993577  |
| C  | -0.296559 | -1.075343 | 0.060777  |
| C  | 2.294790  | 1.707085  | 0.455378  |
| O  | 0.724229  | 1.378692  | 2.195227  |
| N  | -0.783549 | 2.645159  | -0.585663 |
| N  | 0.654997  | -2.053156 | 0.069540  |
| N  | -1.454255 | -1.747766 | 0.341430  |
| C  | 2.637997  | 1.473052  | -0.879054 |
| C  | 3.206177  | 2.370456  | 1.289281  |
| C  | 0.132453  | 3.706691  | -0.980746 |
| C  | -1.675890 | 3.135234  | 0.464791  |
| C  | 0.101843  | -3.305244 | 0.329673  |
| C  | 2.068490  | -1.836355 | -0.087936 |
| C  | -1.226413 | -3.110675 | 0.508469  |
| C  | -2.741259 | -1.127412 | 0.537853  |
| C  | 3.876726  | 1.874444  | -1.374820 |
| H  | 1.921516  | 0.967331  | -1.519720 |
| C  | 4.443383  | 2.778860  | 0.797269  |
| H  | 2.919157  | 2.563388  | 2.318083  |
| C  | -0.650029 | 4.937004  | -1.438912 |
| H  | 0.777061  | 3.359523  | -1.796157 |
| H  | 0.792734  | 4.007889  | -0.148529 |
| C  | -2.423981 | 4.381397  | -0.008683 |
| H  | -2.402379 | 2.355248  | 0.722635  |
| H  | -1.115113 | 3.383815  | 1.382650  |

|   |           |           |           |
|---|-----------|-----------|-----------|
| H | 0.706287  | -4.196357 | 0.363648  |
| C | 2.611338  | -1.836759 | -1.383759 |
| C | 2.846438  | -1.653628 | 1.070057  |
| H | -2.023115 | -3.795129 | 0.747672  |
| C | -3.702835 | -1.229069 | -0.481679 |
| C | -2.985913 | -0.467547 | 1.759812  |
| C | 4.782218  | 2.528244  | -0.536280 |
| H | 4.138983  | 1.674541  | -2.410120 |
| H | 5.143888  | 3.295990  | 1.447794  |
| O | -1.523236 | 5.405844  | -0.417640 |
| H | 0.022603  | 5.769065  | -1.675285 |
| H | -1.232930 | 4.686660  | -2.343498 |
| H | -3.031651 | 4.808603  | 0.796736  |
| H | -3.090253 | 4.113491  | -0.847845 |
| C | 1.732187  | -2.048490 | -2.607559 |
| C | 3.992307  | -1.653683 | -1.504247 |
| C | 2.233827  | -1.713894 | 2.463444  |
| C | 4.220640  | -1.457137 | 0.893615  |
| C | -3.416982 | -1.940422 | -1.795596 |
| C | -4.959257 | -0.659316 | -0.244005 |
| C | -1.928103 | -0.391963 | 2.854043  |
| C | -4.254857 | 0.094089  | 1.939679  |
| H | 5.748102  | 2.845312  | -0.920701 |
| C | 2.157602  | -1.192708 | -3.808546 |
| C | 1.690599  | -3.537855 | -2.993830 |
| H | 0.716392  | -1.747844 | -2.336735 |
| C | 4.787643  | -1.459543 | -0.377603 |
| H | 4.448797  | -1.643065 | -2.488396 |
| C | 2.868838  | -0.726868 | 3.450973  |
| C | 2.319295  | -3.145188 | 3.027105  |
| H | 1.177511  | -1.446261 | 2.375224  |
| H | 4.852326  | -1.292518 | 1.759624  |
| C | -3.986571 | -1.185642 | -3.006275 |
| C | -3.955266 | -3.382638 | -1.770163 |
| H | -2.330810 | -1.982578 | -1.916756 |
| C | -5.232822 | -0.003443 | 0.951796  |
| H | -5.725852 | -0.719597 | -1.009437 |
| C | -2.098615 | 0.811184  | 3.787890  |
| C | -1.887276 | -1.697013 | 3.670983  |
| H | -0.957619 | -0.257458 | 2.374150  |
| H | -4.481835 | 0.614497  | 2.863129  |
| H | 1.414624  | -1.275876 | -4.609714 |
| H | 3.118519  | -1.518271 | -4.222799 |
| H | 2.246641  | -0.135481 | -3.538543 |

|   |           |           |           |
|---|-----------|-----------|-----------|
| H | 1.033568  | -3.694180 | -3.857878 |
| H | 2.691741  | -3.899110 | -3.258021 |
| H | 1.316783  | -4.154914 | -2.170063 |
| H | 5.855906  | -1.298813 | -0.492066 |
| H | 2.297684  | -0.729236 | 4.386198  |
| H | 3.900675  | -1.002740 | 3.698331  |
| H | 2.860020  | 0.290232  | 3.057256  |
| H | 1.838521  | -3.194779 | 4.011342  |
| H | 3.365585  | -3.452563 | 3.144686  |
| H | 1.827643  | -3.874727 | 2.376716  |
| H | -5.080523 | -1.245344 | -3.045106 |
| H | -3.606926 | -1.628448 | -3.934854 |
| H | -3.694229 | -0.134125 | -2.974184 |
| H | -5.043801 | -3.387753 | -1.636551 |
| H | -3.729442 | -3.894321 | -2.713681 |
| H | -3.518632 | -3.970421 | -0.956728 |
| H | -6.212137 | 0.438169  | 1.115639  |
| H | -1.221380 | 0.889282  | 4.437409  |
| H | -2.981654 | 0.716767  | 4.432099  |
| H | -2.175627 | 1.746208  | 3.225582  |
| H | -1.100637 | -1.640770 | 4.433144  |
| H | -2.842961 | -1.867777 | 4.182314  |
| H | -1.680319 | -2.568822 | 3.042926  |
| C | -0.988818 | 0.586312  | -3.207202 |
| H | -1.561283 | 1.038932  | -4.029035 |
| H | 0.022523  | 1.017504  | -3.212539 |
| H | -0.906322 | -0.487435 | -3.399373 |
| O | -1.645282 | 0.780395  | -1.964020 |
| H | -1.507516 | 1.780963  | -1.652025 |

**8**

|    |           |           |           |
|----|-----------|-----------|-----------|
| Ni | 0.519386  | -0.229749 | -0.763026 |
| N  | 1.714742  | -1.004071 | -1.876561 |
| C  | -0.143028 | 0.807743  | 0.680475  |
| C  | 1.765242  | -0.743380 | -3.304507 |
| C  | 2.226174  | -2.338101 | -1.608938 |
| C  | -1.004277 | -0.930631 | -1.527659 |
| N  | -1.289102 | 1.479817  | 0.987572  |
| N  | 0.700888  | 1.128473  | 1.710009  |
| C  | 3.206064  | -0.875006 | -3.805171 |
| H  | 1.392885  | 0.265125  | -3.515225 |
| H  | 1.138512  | -1.456305 | -3.873498 |
| C  | 3.663281  | -2.453285 | -2.125065 |
| H  | 2.217134  | -2.535967 | -0.531005 |

|   |           |           |           |
|---|-----------|-----------|-----------|
| H | 1.617420  | -3.120696 | -2.103090 |
| C | -1.529014 | -2.225289 | -0.967110 |
| O | -1.523371 | -0.423663 | -2.509130 |
| C | -1.150699 | 2.222247  | 2.157432  |
| C | -2.466838 | 1.495565  | 0.162322  |
| C | 0.106075  | 1.996928  | 2.617034  |
| C | 2.066882  | 0.678902  | 1.748537  |
| O | 3.735952  | -2.165814 | -3.517314 |
| H | 3.262370  | -0.756011 | -4.893013 |
| H | 3.830869  | -0.099079 | -3.330579 |
| H | 4.051016  | -3.470776 | -2.000220 |
| H | 4.305263  | -1.755578 | -1.560636 |
| C | -0.973112 | -2.787514 | 0.186247  |
| C | -2.575003 | -2.890046 | -1.622950 |
| H | -1.948587 | 2.840852  | 2.533709  |
| C | -2.479408 | 2.336634  | -0.961431 |
| C | -3.550124 | 0.670285  | 0.515711  |
| H | 0.630915  | 2.371220  | 3.481303  |
| C | 3.039954  | 1.450176  | 1.091278  |
| C | 2.362126  | -0.532863 | 2.401258  |
| C | -1.454068 | -3.997195 | 0.685531  |
| H | -0.158683 | -2.264355 | 0.677485  |
| C | -3.053832 | -4.101551 | -1.129863 |
| H | -2.996717 | -2.436418 | -2.514218 |
| C | -1.295772 | 3.215384  | -1.337383 |
| C | -3.635068 | 2.340236  | -1.749760 |
| C | -3.512980 | -0.216517 | 1.753136  |
| C | -4.682856 | 0.713104  | -0.303622 |
| C | 2.698342  | 2.739223  | 0.359031  |
| C | 4.357462  | 0.977298  | 1.108315  |
| C | 1.277595  | -1.329520 | 3.112040  |
| C | 3.693162  | -0.960664 | 2.391730  |
| C | -2.494694 | -4.656257 | 0.026549  |
| H | -1.016724 | -4.427771 | 1.582014  |
| H | -3.863265 | -4.615424 | -1.641573 |
| C | -1.671027 | 4.705115  | -1.288273 |
| C | -0.726215 | 2.821621  | -2.709797 |
| H | -0.503974 | 3.055565  | -0.601620 |
| C | -4.724914 | 1.538245  | -1.425656 |
| H | -3.675064 | 2.971393  | -2.632393 |
| C | -4.178404 | -1.582048 | 1.531490  |
| C | -4.162733 | 0.494672  | 2.954796  |
| H | -2.461782 | -0.401323 | 1.997397  |
| H | -5.537850 | 0.088415  | -0.067214 |



|   |           |           |           |
|---|-----------|-----------|-----------|
| C | 3.478477  | 3.933518  | 0.930956  |
| C | 2.928530  | 2.589776  | -1.153783 |
| H | 1.634487  | 2.943592  | 0.505615  |
| C | 4.681104  | -0.213631 | 1.750847  |
| H | 5.132839  | 1.544229  | 0.602298  |
| C | 1.474192  | -2.847635 | 3.001349  |
| C | 1.175151  | -0.904224 | 4.588067  |
| H | 0.323510  | -1.088623 | 2.633168  |
| H | 3.961615  | -1.890302 | 2.882156  |
| H | -2.870038 | -5.600530 | 0.411801  |
| H | -2.035254 | 4.992125  | -0.294668 |
| H | -0.798227 | 5.326121  | -1.523279 |
| H | -2.456079 | 4.945214  | -2.014741 |
| H | 0.191299  | 3.385720  | -2.915415 |
| H | -1.440551 | 3.040518  | -3.512863 |
| H | -0.508151 | 1.751371  | -2.744111 |
| H | -5.611820 | 1.551043  | -2.053285 |
| H | -3.968838 | -2.239612 | 2.382575  |
| H | -5.268224 | -1.492788 | 1.451680  |
| H | -3.809255 | -2.067388 | 0.626503  |
| H | -5.217965 | 0.711043  | 2.749002  |
| H | -4.115800 | -0.140455 | 3.847658  |
| H | -3.668434 | 1.442416  | 3.189900  |
| H | 3.291959  | 4.054425  | 2.004468  |
| H | 3.178365  | 4.859728  | 0.426909  |
| H | 4.558884  | 3.813660  | 0.789850  |
| H | 3.985188  | 2.402096  | -1.378392 |
| H | 2.348898  | 1.751679  | -1.551852 |
| H | 2.629503  | 3.506260  | -1.676342 |
| H | 5.708581  | -0.566746 | 1.750073  |
| H | 0.597435  | -3.364837 | 3.407179  |
| H | 2.344504  | -3.191017 | 3.572048  |
| H | 1.607336  | -3.163326 | 1.961248  |
| H | 0.372941  | -1.455417 | 5.093110  |
| H | 2.113543  | -1.107029 | 5.118042  |
| H | 0.960337  | 0.165324  | 4.682205  |

**TS9**

|    |           |           |           |
|----|-----------|-----------|-----------|
| Ni | -0.487149 | 0.275129  | -0.716752 |
| C  | -0.018740 | -0.909097 | 0.653237  |
| N  | -0.883099 | 1.556849  | -2.013184 |
| N  | 1.076673  | -1.654373 | 0.980710  |
| N  | -0.940296 | -1.259657 | 1.603408  |
| C  | 0.986003  | 1.123265  | -1.532941 |

|   |           |           |           |
|---|-----------|-----------|-----------|
| C | -1.092166 | 1.229520  | -3.410603 |
| C | -1.474810 | 2.843963  | -1.693578 |
| C | 0.831640  | -2.463928 | 2.088230  |
| C | 2.302334  | -1.678598 | 0.227152  |
| C | -0.441985 | -2.212594 | 2.484755  |
| C | -2.278266 | -0.734394 | 1.575318  |
| C | 1.559066  | 2.304587  | -0.802933 |
| O | 1.591151  | 0.572691  | -2.447981 |
| C | -2.591549 | 1.210429  | -3.709276 |
| H | -0.644801 | 0.258182  | -3.637490 |
| H | -0.612397 | 1.980686  | -4.064590 |
| C | -2.971877 | 2.801624  | -2.011380 |
| H | -1.331788 | 3.079600  | -0.635640 |
| H | -1.010072 | 3.652039  | -2.287588 |
| H | 1.577750  | -3.140459 | 2.471537  |
| C | 2.350269  | -2.447689 | -0.946634 |
| C | 3.403718  | -0.944105 | 0.703162  |
| H | -1.035407 | -2.619097 | 3.288051  |
| C | -3.238176 | -1.400540 | 0.793686  |
| C | -2.554948 | 0.453065  | 2.279139  |
| C | 1.055331  | 2.728543  | 0.432325  |
| C | 2.641562  | 2.991947  | -1.369850 |
| O | -3.201838 | 2.454036  | -3.372378 |
| H | -2.784869 | 1.057379  | -4.777027 |
| H | -3.065634 | 0.393021  | -3.140417 |
| H | -3.438995 | 3.782395  | -1.864458 |
| H | -3.459136 | 2.069947  | -1.344011 |
| C | 1.139565  | -3.191963 | -1.487725 |
| C | 3.566548  | -2.498923 | -1.636515 |
| C | 3.317833  | -0.096182 | 1.964332  |
| C | 4.596106  | -1.027602 | -0.023059 |
| C | -2.898157 | -2.650440 | -0.005035 |
| C | -4.521385 | -0.843538 | 0.732858  |
| C | -1.484650 | 1.137831  | 3.116024  |
| C | -3.853772 | 0.963978  | 2.193930  |
| C | 1.606109  | 3.831411  | 1.083504  |
| H | 0.233800  | 2.174056  | 0.875126  |
| C | 3.193090  | 4.095945  | -0.721615 |
| H | 3.035568  | 2.641998  | -2.318655 |
| C | 1.356719  | -4.713007 | -1.463254 |
| C | 0.782120  | -2.691816 | -2.897092 |
| H | 0.286469  | -2.971074 | -0.842251 |
| C | 4.679554  | -1.801566 | -1.178363 |
| H | 3.635211  | -3.082783 | -2.549373 |

|   |           |           |           |
|---|-----------|-----------|-----------|
| C | 4.059838  | 1.241270  | 1.827033  |
| C | 3.841567  | -0.870528 | 3.187488  |
| H | 2.261261  | 0.133395  | 2.135994  |
| H | 5.466446  | -0.473871 | 0.313033  |
| C | -3.911322 | -3.781840 | 0.225555  |
| C | -2.772038 | -2.314353 | -1.500857 |
| H | -1.923024 | -3.013890 | 0.331911  |
| C | -4.826775 | 0.323665  | 1.427176  |
| H | -5.285171 | -1.324369 | 0.129825  |
| C | -1.585580 | 2.668843  | 3.087066  |
| C | -1.519025 | 0.620036  | 4.565356  |
| H | -0.513310 | 0.867619  | 2.690904  |
| H | -4.107415 | 1.876558  | 2.722846  |
| C | 2.675082  | 4.520493  | 0.505827  |
| H | 1.205250  | 4.150483  | 2.041854  |
| H | 4.029662  | 4.625364  | -1.170243 |
| H | 1.564979  | -5.070314 | -0.447716 |
| H | 0.463058  | -5.232798 | -1.829726 |
| H | 2.198787  | -5.007611 | -2.100663 |
| H | -0.165773 | -3.131447 | -3.229472 |
| H | 1.552584  | -2.972912 | -3.625400 |
| H | 0.700135  | -1.601439 | -2.904465 |
| H | 5.614550  | -1.850580 | -1.729784 |
| H | 3.820688  | 1.888899  | 2.677787  |
| H | 5.147309  | 1.101905  | 1.821134  |
| H | 3.777616  | 1.764019  | 0.910884  |
| H | 4.897128  | -1.136173 | 3.053046  |
| H | 3.760140  | -0.258289 | 4.093841  |
| H | 3.283277  | -1.796958 | 3.356239  |
| H | -4.013938 | -4.015562 | 1.291396  |
| H | -3.583921 | -4.690690 | -0.292296 |
| H | -4.904456 | -3.524751 | -0.159806 |
| H | -3.718747 | -1.929389 | -1.897815 |
| H | -2.000016 | -1.552976 | -1.668177 |
| H | -2.500688 | -3.208507 | -2.074340 |
| H | -5.827854 | 0.741598  | 1.367726  |
| H | -0.712964 | 3.106600  | 3.584786  |
| H | -2.474549 | 3.031933  | 3.615235  |
| H | -1.622132 | 3.051049  | 2.061615  |
| H | -0.726347 | 1.088678  | 5.160641  |
| H | -2.481226 | 0.850361  | 5.038402  |
| H | -1.375014 | -0.464668 | 4.606476  |
| H | 3.107679  | 5.379425  | 1.011835  |

10

|    |           |           |           |
|----|-----------|-----------|-----------|
| Ni | 0.341895  | -0.406329 | -0.683059 |
| C  | 0.153814  | 0.893180  | 0.620898  |
| N  | 0.413120  | -1.776384 | -2.026434 |
| N  | -0.840593 | 1.773133  | 0.961703  |
| N  | 1.157157  | 1.199614  | 1.508542  |
| C  | -1.021526 | -1.480233 | -1.845671 |
| C  | 0.970651  | -1.300743 | -3.311414 |
| C  | 0.967686  | -3.112200 | -1.714897 |
| C  | -0.457418 | 2.603720  | 2.014081  |
| C  | -2.091186 | 1.902277  | 0.264965  |
| C  | 0.801975  | 2.240218  | 2.362019  |
| C  | 2.444085  | 0.565352  | 1.446499  |
| C  | -1.798271 | -2.367990 | -0.903260 |
| O  | -1.622196 | -0.837622 | -2.733768 |
| C  | 2.491075  | -1.286675 | -3.227987 |
| H  | 0.583176  | -0.304573 | -3.516910 |
| H  | 0.639896  | -1.970557 | -4.118393 |
| C  | 2.488937  | -3.035636 | -1.679940 |
| H  | 0.595426  | -3.462012 | -0.755329 |
| H  | 0.647550  | -3.822882 | -2.491127 |
| H  | -1.111616 | 3.367686  | 2.401648  |
| C  | -2.114178 | 2.600751  | -0.954416 |
| C  | -3.248131 | 1.348685  | 0.842049  |
| H  | 1.474276  | 2.619826  | 3.115085  |
| C  | 3.464000  | 1.195187  | 0.711641  |
| C  | 2.619424  | -0.678116 | 2.082723  |
| C  | -1.369128 | -2.734972 | 0.382069  |
| C  | -3.046468 | -2.827422 | -1.346738 |
| O  | 3.019149  | -2.570644 | -2.913118 |
| H  | 2.918428  | -1.002598 | -4.194543 |
| H  | 2.810392  | -0.555692 | -2.470188 |
| H  | 2.911004  | -4.031785 | -1.513559 |
| H  | 2.802749  | -2.374752 | -0.856089 |
| C  | -0.853797 | 3.143799  | -1.608025 |
| C  | -3.353512 | 2.769847  | -1.581626 |
| C  | -3.194865 | 0.556665  | 2.139752  |
| C  | -4.463821 | 1.551103  | 0.180292  |
| C  | 3.222169  | 2.505510  | -0.025038 |
| C  | 4.698089  | 0.539531  | 0.622564  |
| C  | 1.491016  | -1.315735 | 2.880037  |
| C  | 3.871718  | -1.290527 | 1.968723  |
| C  | -2.139216 | -3.579457 | 1.178656  |
| H  | -0.438863 | -2.322924 | 0.761516  |

|   |           |           |           |
|---|-----------|-----------|-----------|
| C | -3.823120 | -3.666777 | -0.547440 |
| H | -3.390162 | -2.514171 | -2.326672 |
| C | -0.856119 | 4.679963  | -1.646288 |
| C | -0.668517 | 2.540332  | -3.009781 |
| H | 0.001547  | 2.828797  | -1.007836 |
| C | -4.518625 | 2.260149  | -1.017032 |
| H | -3.401889 | 3.302368  | -2.526623 |
| C | -4.059421 | -0.710904 | 2.078188  |
| C | -3.601997 | 1.428988  | 3.340155  |
| H | -2.158382 | 0.238968  | 2.289620  |
| H | -5.375698 | 1.139198  | 0.600192  |
| C | 2.921643  | 2.231903  | -1.509205 |
| C | 4.380229  | 3.501370  | 0.131437  |
| H | 2.332066  | 2.975263  | 0.403003  |
| C | 4.900650  | -0.689317 | 1.244643  |
| H | 5.504909  | 0.990231  | 0.053623  |
| C | 1.509885  | -2.848988 | 2.834566  |
| C | 1.507489  | -0.816086 | 4.335955  |
| H | 0.550536  | -0.989327 | 2.427661  |
| H | 4.045219  | -2.249983 | 2.444127  |
| C | -3.367726 | -4.056486 | 0.713774  |
| H | -1.787306 | -3.852120 | 2.170139  |
| H | -4.785382 | -4.017663 | -0.911031 |
| H | -1.694238 | 5.064827  | -2.239556 |
| H | 0.071450  | 5.054033  | -2.096907 |
| H | -0.938012 | 5.103437  | -0.638184 |
| H | 0.316313  | 2.806975  | -3.412669 |
| H | -1.425462 | 2.915267  | -3.709571 |
| H | -0.759788 | 1.450708  | -2.973396 |
| H | -5.471950 | 2.403322  | -1.518497 |
| H | -3.856192 | -1.346226 | 2.947859  |
| H | -5.129716 | -0.473214 | 2.092674  |
| H | -3.851461 | -1.290427 | 1.176392  |
| H | -4.632648 | 1.786988  | 3.227791  |
| H | -3.544150 | 0.853600  | 4.272174  |
| H | -2.953666 | 2.305243  | 3.444101  |
| H | 2.694422  | 3.167110  | -2.035019 |
| H | 2.062581  | 1.559120  | -1.610356 |
| H | 3.783354  | 1.766018  | -2.002519 |
| H | 4.110877  | 4.461683  | -0.323221 |
| H | 4.616781  | 3.679275  | 1.186767  |
| H | 5.293038  | 3.152066  | -0.364266 |
| H | 5.864325  | -1.184527 | 1.162937  |
| H | 1.556214  | -3.220562 | 1.805157  |

|   |           |           |          |
|---|-----------|-----------|----------|
| H | 0.599776  | -3.245607 | 3.298576 |
| H | 2.360970  | -3.267729 | 3.383952 |
| H | 0.676533  | -1.254021 | 4.902037 |
| H | 2.443552  | -1.095286 | 4.834918 |
| H | 1.410391  | 0.273430  | 4.386024 |
| H | -3.972595 | -4.709585 | 1.336970 |

**11**

|   |           |           |           |
|---|-----------|-----------|-----------|
| N | 1.095974  | 0.453408  | 0.121287  |
| C | 1.218855  | -0.757192 | 0.934932  |
| C | 2.370987  | 1.149313  | -0.047947 |
| C | 2.282933  | -1.666314 | 0.327348  |
| H | 0.261582  | -1.271574 | 1.002943  |
| H | 1.529543  | -0.474862 | 1.952104  |
| C | -0.068984 | 1.141688  | -0.116714 |
| C | 3.395063  | 0.171057  | -0.616078 |
| H | 2.217877  | 1.995388  | -0.718310 |
| H | 2.719654  | 1.534102  | 0.921670  |
| O | 3.525602  | -0.988256 | 0.200197  |
| H | 2.462424  | -2.530181 | 0.974081  |
| H | 1.943899  | -2.026713 | -0.658352 |
| C | -1.359400 | 0.375503  | -0.066425 |
| O | -0.070950 | 2.336275  | -0.415490 |
| H | 4.385105  | 0.634259  | -0.657911 |
| H | 3.097178  | -0.118393 | -1.637175 |
| C | -1.511340 | -0.869374 | -0.692143 |
| C | -2.469043 | 0.983492  | 0.533052  |
| C | -2.752567 | -1.505597 | -0.699139 |
| H | -0.662912 | -1.326200 | -1.193374 |
| C | -3.704296 | 0.338612  | 0.541969  |
| H | -2.351703 | 1.963187  | 0.985090  |
| C | -3.848256 | -0.907390 | -0.073577 |
| H | -2.864955 | -2.464740 | -1.196711 |
| H | -4.557035 | 0.811072  | 1.021236  |
| H | -4.813402 | -1.406143 | -0.073614 |

**12**

|    |           |           |           |
|----|-----------|-----------|-----------|
| Ni | 0.516853  | 0.195100  | -1.231030 |
| C  | -0.100102 | -1.439972 | -2.131319 |
| C  | 0.909401  | 0.572028  | 0.551976  |
| C  | -1.499770 | -1.930630 | -1.801308 |
| O  | 0.101350  | -0.443863 | -2.934943 |
| O  | 0.764575  | -2.524815 | -2.133255 |
| N  | 2.092012  | 0.361125  | 1.211637  |

|   |           |           |           |
|---|-----------|-----------|-----------|
| N | 0.166137  | 1.272429  | 1.468935  |
| C | -2.493173 | -0.781972 | -1.652448 |
| H | -1.440473 | -2.528688 | -0.887555 |
| H | -1.821453 | -2.612652 | -2.603588 |
| C | 2.092436  | -2.250924 | -2.569932 |
| C | 2.087023  | 0.917363  | 2.486389  |
| C | 3.190118  | -0.365183 | 0.639411  |
| C | 0.870477  | 1.497257  | 2.647430  |
| C | -1.185041 | 1.691882  | 1.220864  |
| C | -3.911225 | -1.161039 | -1.285884 |
| H | -2.501491 | -0.201812 | -2.581970 |
| H | -2.105773 | -0.093748 | -0.888006 |
| H | 2.115533  | -2.002684 | -3.636745 |
| H | 2.523031  | -1.417913 | -2.003113 |
| H | 2.666982  | -3.161521 | -2.388776 |
| H | 2.939765  | 0.849904  | 3.143140  |
| C | 4.089620  | 0.320528  | -0.195300 |
| C | 3.303816  | -1.737250 | 0.918630  |
| H | 0.444045  | 2.046075  | 3.472250  |
| C | -1.405646 | 2.790503  | 0.376191  |
| C | -2.234284 | 0.955462  | 1.808303  |
| C | -4.917349 | -0.187096 | -1.389138 |
| C | -4.270207 | -2.424365 | -0.799522 |
| C | 3.916247  | 1.796944  | -0.518633 |
| C | 5.135639  | -0.416338 | -0.761743 |
| C | 2.300266  | -2.467997 | 1.797640  |
| C | 4.375307  | -2.427655 | 0.340557  |
| C | -0.265798 | 3.585769  | -0.242922 |
| C | -2.734606 | 3.140543  | 0.103223  |
| C | -1.947323 | -0.256448 | 2.687793  |
| C | -3.541547 | 1.345541  | 1.505680  |
| C | -6.228993 | -0.456553 | -1.005538 |
| H | -4.655706 | 0.797917  | -1.766902 |
| C | -5.585400 | -2.700870 | -0.412862 |
| H | -3.521092 | -3.205388 | -0.718224 |
| C | 5.208612  | 2.596966  | -0.298549 |
| C | 3.387415  | 1.974426  | -1.951692 |
| H | 3.161038  | 2.202822  | 0.160742  |
| C | 5.280928  | -1.776089 | -0.492953 |
| H | 5.841852  | 0.078419  | -1.421466 |
| C | 1.635779  | -3.630326 | 1.043184  |
| C | 2.955770  | -2.947672 | 3.103111  |
| H | 1.508365  | -1.763705 | 2.064223  |
| H | 4.491758  | -3.489491 | 0.535583  |

|   |           |           |           |
|---|-----------|-----------|-----------|
| C | -0.341540 | 5.072452  | 0.139297  |
| C | -0.233532 | 3.402785  | -1.768453 |
| H | 0.675401  | 3.193765  | 0.151334  |
| C | -3.789844 | 2.425618  | 0.658997  |
| H | -2.939867 | 3.980537  | -0.553480 |
| C | -3.050399 | -0.539428 | 3.715393  |
| C | -1.691665 | -1.502793 | 1.820306  |
| H | -1.027621 | -0.053944 | 3.246610  |
| H | -4.376555 | 0.792074  | 1.918828  |
| C | -6.569766 | -1.718633 | -0.509915 |
| H | -6.987785 | 0.316931  | -1.094780 |
| H | -5.837089 | -3.689572 | -0.037658 |
| H | 5.584765  | 2.474269  | 0.723610  |
| H | 5.024810  | 3.664469  | -0.467563 |
| H | 6.002463  | 2.287558  | -0.987784 |
| H | 3.216428  | 3.034723  | -2.172422 |
| H | 4.101285  | 1.583835  | -2.686875 |
| H | 2.441059  | 1.434432  | -2.088246 |
| H | 6.101282  | -2.330884 | -0.940048 |
| H | 0.858862  | -4.088939 | 1.666750  |
| H | 2.361745  | -4.413673 | 0.793361  |
| H | 1.176085  | -3.284382 | 0.112845  |
| H | 2.215412  | -3.439180 | 3.745497  |
| H | 3.757944  | -3.668609 | 2.904955  |
| H | 3.390315  | -2.111888 | 3.664014  |
| H | -0.344944 | 5.203604  | 1.227518  |
| H | 0.522031  | 5.613075  | -0.266018 |
| H | -1.245827 | 5.547622  | -0.258137 |
| H | -1.148632 | 3.785579  | -2.235634 |
| H | -0.147598 | 2.340217  | -2.033549 |
| H | 0.618757  | 3.936716  | -2.204307 |
| H | -4.814572 | 2.703954  | 0.430119  |
| H | -2.724799 | -1.332888 | 4.397666  |
| H | -3.287315 | 0.347210  | 4.314774  |
| H | -3.973647 | -0.884222 | 3.236153  |
| H | -2.605066 | -1.783761 | 1.286262  |
| H | -1.390140 | -2.349688 | 2.448932  |
| H | -0.907891 | -1.322560 | 1.080297  |
| H | -7.591867 | -1.933185 | -0.209782 |

### TS13

|    |           |           |           |
|----|-----------|-----------|-----------|
| Ni | -0.703577 | 0.321052  | -1.117375 |
| C  | -1.150713 | 0.125641  | 0.678810  |
| C  | 0.668276  | -0.770972 | -1.841378 |



|   |           |           |           |
|---|-----------|-----------|-----------|
| N | -0.410323 | 0.135473  | 1.828512  |
| N | -2.437452 | 0.021466  | 1.131180  |
| O | -0.068046 | 0.350782  | -2.905427 |
| C | 2.028949  | -0.181538 | -1.523226 |
| O | 0.481750  | -1.960816 | -2.084030 |
| C | -1.215955 | 0.042673  | 2.960166  |
| C | 1.022989  | 0.230279  | 1.848013  |
| C | -2.498158 | -0.028744 | 2.519685  |
| C | -3.560330 | -0.053017 | 0.236984  |
| C | -0.928284 | -0.251423 | -3.864503 |
| C | 3.153468  | -0.713371 | -2.435651 |
| H | 1.991205  | 0.908632  | -1.553493 |
| H | 2.253187  | -0.467778 | -0.493747 |
| H | -0.800006 | 0.036510  | 3.955037  |
| C | 1.617341  | 1.490727  | 1.664985  |
| C | 1.773146  | -0.947760 | 2.012418  |
| H | -3.434251 | -0.112097 | 3.048782  |
| C | -4.020218 | -1.321989 | -0.156182 |
| C | -4.118077 | 1.144250  | -0.244492 |
| H | -1.927212 | 0.201188  | -3.821835 |
| H | -0.507706 | -0.092811 | -4.866637 |
| H | -1.011198 | -1.329719 | -3.680842 |
| C | 4.500845  | -0.359825 | -1.856932 |
| H | 3.047613  | -1.799394 | -2.518754 |
| H | 3.033694  | -0.292461 | -3.441166 |
| C | 0.798211  | 2.761879  | 1.495127  |
| C | 3.015240  | 1.546817  | 1.628699  |
| C | 1.121012  | -2.312805 | 2.176815  |
| C | 3.168209  | -0.834474 | 1.987190  |
| C | -3.357798 | -2.604015 | 0.324697  |
| C | -5.086715 | -1.368831 | -1.060886 |
| C | -3.559310 | 2.504435  | 0.145210  |
| C | -5.181594 | 1.044495  | -1.148560 |
| C | 5.024561  | 0.933952  | -1.986699 |
| C | 5.216709  | -1.293092 | -1.095782 |
| C | 0.971631  | 3.349633  | 0.085858  |
| C | 1.141734  | 3.796843  | 2.578699  |
| H | -0.257800 | 2.503447  | 1.611466  |
| C | 3.785086  | 0.397776  | 1.786240  |
| H | 3.506954  | 2.500411  | 1.462857  |
| C | 1.521674  | -3.268805 | 1.040874  |
| C | 1.443607  | -2.916238 | 3.554129  |
| H | 0.036965  | -2.182293 | 2.120704  |
| H | 3.777052  | -1.726782 | 2.094607  |

|   |           |           |           |
|---|-----------|-----------|-----------|
| C | -4.378150 | -3.599770 | 0.897632  |
| C | -2.529921 | -3.239645 | -0.806270 |
| H | -2.665016 | -2.346722 | 1.130715  |
| C | -5.662534 | -0.199205 | -1.551941 |
| H | -5.461814 | -2.332039 | -1.392477 |
| C | -4.651180 | 3.466577  | 0.635673  |
| C | -2.770498 | 3.109775  | -1.028511 |
| H | -2.856981 | 2.358339  | 0.970854  |
| H | -5.632945 | 1.948734  | -1.545432 |
| C | 6.226307  | 1.286190  | -1.372025 |
| H | 4.480064  | 1.671128  | -2.572703 |
| C | 6.422643  | -0.948527 | -0.483199 |
| H | 4.818043  | -2.298276 | -0.981109 |
| H | 2.018354  | 3.607950  | -0.113700 |
| H | 0.372262  | 4.261084  | -0.025614 |
| H | 0.646226  | 2.629727  | -0.672739 |
| H | 1.000101  | 3.382659  | 3.583637  |
| H | 0.497807  | 4.678804  | 2.479701  |
| H | 2.181441  | 4.134648  | 2.499616  |
| H | 4.867058  | 0.458970  | 1.728543  |
| H | 2.601427  | -3.460660 | 1.040997  |
| H | 1.014946  | -4.233501 | 1.167184  |
| H | 1.243231  | -2.867114 | 0.062011  |
| H | 1.130344  | -2.250918 | 4.367351  |
| H | 2.518839  | -3.097856 | 3.668723  |
| H | 0.927902  | -3.875359 | 3.681565  |
| H | -3.860753 | -4.476866 | 1.303353  |
| H | -4.969332 | -3.149675 | 1.703788  |
| H | -5.073991 | -3.955847 | 0.129452  |
| H | -2.035301 | -4.150536 | -0.447037 |
| H | -3.171512 | -3.517347 | -1.651849 |
| H | -1.754510 | -2.561136 | -1.174177 |
| H | -6.488341 | -0.257154 | -2.255776 |
| H | -5.214247 | 3.036801  | 1.471920  |
| H | -4.201061 | 4.406622  | 0.975425  |
| H | -5.364651 | 3.712251  | -0.158787 |
| H | -3.420691 | 3.279541  | -1.894980 |
| H | -1.959709 | 2.440080  | -1.346158 |
| H | -2.323825 | 4.069236  | -0.742608 |
| C | 6.931293  | 0.345269  | -0.616826 |
| H | 6.616285  | 2.294413  | -1.486230 |
| H | 6.965191  | -1.690343 | 0.097473  |
| H | 7.870643  | 0.616755  | -0.142656 |

14

|    |           |           |           |
|----|-----------|-----------|-----------|
| Ni | 0.579257  | -0.964161 | -0.632467 |
| C  | -0.819066 | -0.118709 | -1.466327 |
| C  | 1.169411  | 0.453708  | 0.464713  |
| C  | -2.177238 | -0.702610 | -1.104495 |
| O  | -0.665879 | 0.749181  | -2.301306 |
| O  | 0.400386  | -2.565794 | -1.421407 |
| N  | 0.563387  | 1.353583  | 1.289625  |
| N  | 2.500323  | 0.656812  | 0.681107  |
| C  | -3.338603 | -0.145769 | -1.943130 |
| H  | -2.082431 | -1.789106 | -1.214646 |
| H  | -2.349185 | -0.522279 | -0.037834 |
| C  | 0.594670  | -2.745221 | -2.792900 |
| C  | 1.497947  | 2.085571  | 2.018157  |
| C  | -0.861110 | 1.443687  | 1.464954  |
| C  | 2.722974  | 1.644015  | 1.633742  |
| C  | 3.515921  | -0.114652 | 0.014196  |
| C  | -4.658824 | -0.744113 | -1.521997 |
| H  | -3.142526 | -0.355565 | -3.001457 |
| H  | -3.369650 | 0.942449  | -1.836887 |
| H  | 1.468398  | -2.199031 | -3.193181 |
| H  | -0.283033 | -2.428337 | -3.388858 |
| H  | 0.753862  | -3.815366 | -3.012430 |
| H  | 1.200230  | 2.831603  | 2.736759  |
| C  | -1.477820 | 0.534852  | 2.341813  |
| C  | -1.574024 | 2.415654  | 0.739219  |
| H  | 3.717140  | 1.933337  | 1.935378  |
| C  | 4.143214  | 0.440811  | -1.115443 |
| C  | 3.807860  | -1.401800 | 0.498830  |
| C  | -5.596155 | 0.009492  | -0.804836 |
| C  | -4.960160 | -2.084062 | -1.806446 |
| C  | -0.690421 | -0.530681 | 3.090551  |
| C  | -2.868806 | 0.613710  | 2.478583  |
| C  | -0.864381 | 3.405506  | -0.174225 |
| C  | -2.960958 | 2.459104  | 0.920004  |
| C  | 3.721579  | 1.791319  | -1.675067 |
| C  | 5.117049  | -0.332886 | -1.754882 |
| C  | 3.103558  | -1.998312 | 1.709450  |
| C  | 4.793470  | -2.132897 | -0.174824 |
| C  | -6.799565 | -0.555906 | -0.378720 |
| H  | -5.376081 | 1.049587  | -0.581154 |
| C  | -6.160363 | -2.654085 | -1.383073 |
| H  | -4.245371 | -2.683073 | -2.366352 |
| C  | -1.009453 | -0.534637 | 4.593419  |

|   |           |           |           |
|---|-----------|-----------|-----------|
| C | -0.928208 | -1.916758 | 2.467396  |
| H | 0.374535  | -0.302974 | 2.986414  |
| C | -3.602075 | 1.566852  | 1.777485  |
| H | -3.382152 | -0.082831 | 3.133726  |
| C | -1.658326 | 3.736360  | -1.444796 |
| C | -0.527420 | 4.694888  | 0.597775  |
| H | 0.074108  | 2.943591  | -0.494434 |
| H | -3.547332 | 3.193356  | 0.378188  |
| C | 4.907726  | 2.633041  | -2.166418 |
| C | 2.681159  | 1.591704  | -2.793139 |
| H | 3.235061  | 2.355482  | -0.873074 |
| C | 5.443000  | -1.604274 | -1.286492 |
| H | 5.619086  | 0.058102  | -2.633598 |
| C | 2.537360  | -3.395689 | 1.409124  |
| C | 4.041273  | -2.020486 | 2.928292  |
| H | 2.255090  | -1.356068 | 1.961089  |
| H | 5.048531  | -3.129174 | 0.172285  |
| C | -7.085358 | -1.891465 | -0.665163 |
| H | -7.514683 | 0.048105  | 0.174118  |
| H | -6.375711 | -3.693736 | -1.615524 |
| H | -0.850543 | 0.454148  | 5.038840  |
| H | -0.361633 | -1.250329 | 5.112706  |
| H | -2.046633 | -0.829264 | 4.788863  |
| H | -0.346215 | -2.680631 | 2.996114  |
| H | -1.986512 | -2.198116 | 2.522721  |
| H | -0.630352 | -1.929583 | 1.412993  |
| H | -4.680795 | 1.608977  | 1.894404  |
| H | -1.050859 | 4.371504  | -2.099733 |
| H | -2.579821 | 4.287508  | -1.223620 |
| H | -1.908627 | 2.828263  | -1.997946 |
| H | 0.018949  | 5.394742  | -0.045476 |
| H | -1.443195 | 5.192629  | 0.939067  |
| H | 0.090734  | 4.493935  | 1.478756  |
| H | 4.561751  | 3.633398  | -2.450475 |
| H | 5.672870  | 2.745390  | -1.389462 |
| H | 5.385461  | 2.193401  | -3.049388 |
| H | 3.109235  | 1.010352  | -3.619018 |
| H | 2.359879  | 2.561703  | -3.192523 |
| H | 1.791619  | 1.066051  | -2.434094 |
| H | 6.202957  | -2.189316 | -1.797127 |
| H | 3.336758  | -4.124585 | 1.232017  |
| H | 1.952161  | -3.753303 | 2.264402  |
| H | 1.887958  | -3.379558 | 0.527042  |
| H | 4.918586  | -2.650788 | 2.740516  |

|   |           |           |           |
|---|-----------|-----------|-----------|
| H | 3.520239  | -2.420878 | 3.806218  |
| H | 4.399156  | -1.014123 | 3.175150  |
| H | -8.021281 | -2.334533 | -0.335800 |

**15**

|    |           |           |           |
|----|-----------|-----------|-----------|
| Ni | 0.456348  | 0.830194  | -0.086369 |
| C  | -0.947994 | 0.485157  | 1.135438  |
| C  | 1.153092  | -0.922495 | 0.125243  |
| C  | -2.351996 | 0.473924  | 0.507739  |
| O  | -0.836109 | 0.344020  | 2.349329  |
| N  | 0.575711  | -2.147119 | -0.036317 |
| N  | 2.431435  | -1.211177 | 0.503534  |
| C  | -3.509530 | 0.784494  | 1.472332  |
| H  | -2.376372 | 1.153009  | -0.350277 |
| H  | -2.498937 | -0.522414 | 0.082869  |
| C  | 1.472452  | -3.178616 | 0.245297  |
| C  | -0.769716 | -2.367935 | -0.483568 |
| C  | 2.636627  | -2.587031 | 0.598330  |
| C  | 3.503176  | -0.258062 | 0.617588  |
| C  | -4.833324 | 0.690367  | 0.756468  |
| H  | -3.377219 | 1.786463  | 1.898589  |
| H  | -3.475074 | 0.081962  | 2.309421  |
| H  | 1.187783  | -4.215133 | 0.168043  |
| C  | -1.679607 | -2.972835 | 0.400367  |
| C  | -1.119175 | -1.970333 | -1.792077 |
| H  | 3.590637  | -2.996873 | 0.888170  |
| C  | 3.522015  | 0.626839  | 1.710492  |
| C  | 4.500524  | -0.271353 | -0.372956 |
| C  | -5.542997 | -0.517650 | 0.719031  |
| C  | -5.349862 | 1.786730  | 0.052102  |
| C  | -1.304483 | -3.382501 | 1.818760  |
| C  | -2.984141 | -3.189862 | -0.062392 |
| C  | -0.095151 | -1.362874 | -2.744389 |
| C  | -2.440327 | -2.193143 | -2.193162 |
| C  | 2.436509  | 0.589137  | 2.775598  |
| C  | 4.600956  | 1.513554  | 1.800751  |
| C  | 4.458817  | -1.201236 | -1.580660 |
| C  | 5.556789  | 0.637153  | -0.234959 |
| C  | -6.731685 | -0.630191 | -0.002714 |
| H  | -5.152381 | -1.376424 | 1.258582  |
| C  | -6.538194 | 1.679728  | -0.671665 |
| H  | -4.814898 | 2.734092  | 0.074253  |
| C  | -2.227072 | -2.743024 | 2.868380  |
| C  | -1.290373 | -4.914902 | 1.954267  |

|   |           |           |           |
|---|-----------|-----------|-----------|
| H | -0.295488 | -3.019202 | 2.026957  |
| C | -3.364398 | -2.796807 | -1.340857 |
| H | -3.710929 | -3.655231 | 0.596141  |
| C | -0.716454 | -0.484218 | -3.835216 |
| C | 0.774155  | -2.471066 | -3.366981 |
| H | 0.566513  | -0.704902 | -2.178257 |
| H | -2.754733 | -1.890392 | -3.185460 |
| C | 2.181993  | 1.949662  | 3.434488  |
| C | 2.758264  | -0.480636 | 3.833844  |
| H | 1.494873  | 0.305822  | 2.303822  |
| C | 5.611218  | 1.517843  | 0.840597  |
| H | 4.652794  | 2.207562  | 2.632879  |
| C | 4.221906  | -0.420728 | -2.883047 |
| C | 5.722047  | -2.073069 | -1.661357 |
| H | 3.607983  | -1.875680 | -1.469523 |
| H | 6.338503  | 0.659842  | -0.988193 |
| C | -7.233716 | 0.469106  | -0.702665 |
| H | -7.268810 | -1.575279 | -0.015542 |
| H | -6.923316 | 2.543043  | -1.208166 |
| H | -3.274297 | -3.034262 | 2.726124  |
| H | -1.928635 | -3.067632 | 3.872529  |
| H | -2.152552 | -1.653230 | 2.832518  |
| H | -2.289743 | -5.336008 | 1.792030  |
| H | -0.615099 | -5.379212 | 1.226139  |
| H | -0.961947 | -5.208005 | 2.958287  |
| H | -4.386626 | -2.950268 | -1.674132 |
| H | -1.383677 | 0.271399  | -3.405563 |
| H | -1.285056 | -1.063454 | -4.573144 |
| H | 0.082117  | 0.040642  | -4.370345 |
| H | 1.540920  | -2.031850 | -4.015382 |
| H | 0.165602  | -3.155512 | -3.971770 |
| H | 1.283168  | -3.063374 | -2.599019 |
| H | 2.020959  | 2.730547  | 2.681639  |
| H | 3.009507  | 2.267942  | 4.080087  |
| H | 1.282143  | 1.888576  | 4.055240  |
| H | 1.953291  | -0.535501 | 4.576226  |
| H | 3.694272  | -0.249817 | 4.358246  |
| H | 2.862687  | -1.471900 | 3.378576  |
| H | 6.439578  | 2.215676  | 0.929210  |
| H | 5.032962  | 0.291325  | -3.078628 |
| H | 4.177833  | -1.114741 | -3.732012 |
| H | 3.275002  | 0.122478  | -2.811513 |
| H | 5.640137  | -2.782970 | -2.492966 |
| H | 5.876126  | -2.646374 | -0.739234 |

|   |           |           |           |
|---|-----------|-----------|-----------|
| H | 6.621363  | -1.469308 | -1.829824 |
| H | -8.160458 | 0.384689  | -1.263635 |
| N | -0.069493 | 2.783416  | -0.183617 |
| C | -0.813972 | 3.483102  | 0.890048  |
| C | -0.651972 | 3.101980  | -1.513801 |
| H | 0.878806  | 3.163628  | -0.181813 |
| C | -0.919058 | 4.976341  | 0.595749  |
| H | -0.309315 | 3.300636  | 1.842198  |
| H | -1.815263 | 3.052267  | 0.944742  |
| C | -0.767320 | 4.607839  | -1.713367 |
| H | -0.017149 | 2.626779  | -2.264721 |
| H | -1.647554 | 2.650380  | -1.557464 |
| O | -1.524590 | 5.212905  | -0.668760 |
| H | -1.544925 | 5.472195  | 1.343906  |
| H | 0.083958  | 5.438542  | 0.624902  |
| H | -1.285864 | 4.834919  | -2.649629 |
| H | 0.237934  | 5.061826  | -1.756882 |
| C | 2.591096  | 2.287060  | -1.444455 |
| H | 3.496670  | 2.139784  | -2.059375 |
| H | 2.964332  | 2.508312  | -0.423731 |
| H | 2.144610  | 3.236742  | -1.828716 |
| O | 1.741602  | 1.197565  | -1.514318 |

### TS16

|    |           |           |           |
|----|-----------|-----------|-----------|
| Ni | -0.445807 | 0.849448  | 0.057641  |
| C  | 0.949274  | 0.561777  | -1.128086 |
| C  | -1.094485 | -0.955199 | -0.011326 |
| C  | 2.364490  | 0.486035  | -0.559874 |
| O  | 0.770901  | 0.493626  | -2.336308 |
| N  | 0.077619  | 2.721877  | 0.275165  |
| N  | -2.352024 | -1.376240 | -0.334883 |
| N  | -0.431690 | -2.117880 | 0.269629  |
| C  | 3.432264  | 1.171179  | -1.431238 |
| H  | 2.388997  | 0.867163  | 0.461205  |
| H  | 2.608678  | -0.575951 | -0.489493 |
| C  | 1.271262  | 3.159346  | 0.990891  |
| C  | -0.175071 | 3.597618  | -0.869322 |
| C  | -2.464295 | -2.764118 | -0.270778 |
| C  | -3.494348 | -0.535539 | -0.574808 |
| C  | -1.257270 | -3.231368 | 0.120137  |
| C  | 0.939642  | -2.224765 | 0.685052  |
| C  | 4.804221  | 0.904732  | -0.864234 |
| H  | 3.350470  | 0.785985  | -2.452184 |
| H  | 3.238103  | 2.248921  | -1.478065 |

|   |           |           |           |
|---|-----------|-----------|-----------|
| C | 1.128970  | 4.622088  | 1.411623  |
| H | 1.417750  | 2.531255  | 1.877626  |
| H | 2.172710  | 3.074967  | 0.363955  |
| C | -0.267115 | 5.056119  | -0.422958 |
| H | -1.111905 | 3.301378  | -1.354561 |
| H | 0.626774  | 3.504860  | -1.620326 |
| H | -3.390919 | -3.267405 | -0.494556 |
| C | -4.493410 | -0.497374 | 0.412794  |
| C | -3.590930 | 0.162561  | -1.794052 |
| H | -0.900071 | -4.231693 | 0.302824  |
| C | 1.844456  | -2.879564 | -0.168652 |
| C | 1.319700  | -1.682342 | 1.931446  |
| C | 5.506542  | -0.257608 | -1.212477 |
| C | 5.369537  | 1.763679  | 0.087198  |
| O | 0.902916  | 5.458600  | 0.282135  |
| H | 2.045009  | 4.987627  | 1.888592  |
| H | 0.294705  | 4.722785  | 2.127635  |
| H | -0.356690 | 5.728993  | -1.282650 |
| H | -1.153791 | 5.189710  | 0.221198  |
| C | -4.357911 | -1.213262 | 1.752318  |
| C | -5.642536 | 0.255121  | 0.138190  |
| C | -2.483119 | 0.084708  | -2.834853 |
| C | -4.755825 | 0.904982  | -2.012771 |
| C | 1.456009  | -3.402285 | -1.546418 |
| C | 3.171645  | -3.001867 | 0.264361  |
| C | 0.306121  | -1.002457 | 2.846455  |
| C | 2.661448  | -1.813345 | 2.301922  |
| C | 6.736302  | -0.555714 | -0.625459 |
| H | 5.078927  | -0.933537 | -1.949262 |
| C | 6.599565  | 1.470160  | 0.677907  |
| H | 4.838303  | 2.671307  | 0.365135  |
| C | -5.508442 | -2.207662 | 1.975941  |
| C | -4.246028 | -0.216529 | 2.918215  |
| H | -3.429599 | -1.787735 | 1.745377  |
| C | -5.775102 | 0.945833  | -1.061249 |
| H | -6.433143 | 0.306824  | 0.880704  |
| C | -2.447648 | 1.286365  | -3.785033 |
| C | -2.576531 | -1.228672 | -3.633038 |
| H | -1.523256 | 0.083960  | -2.314057 |
| H | -4.870259 | 1.457379  | -2.938676 |
| C | 1.601699  | -4.931305 | -1.617187 |
| C | 2.265483  | -2.715668 | -2.659973 |
| H | 0.406340  | -3.159866 | -1.727335 |
| C | 3.579186  | -2.467849 | 1.480996  |



|           |           |           |           |
|-----------|-----------|-----------|-----------|
| H         | 3.897138  | -3.493190 | -0.376304 |
| C         | 0.936477  | -0.055561 | 3.872739  |
| C         | -0.579841 | -2.046806 | 3.550382  |
| H         | -0.346247 | -0.386433 | 2.220545  |
| H         | 2.999252  | -1.395542 | 3.243059  |
| C         | 7.287187  | 0.307358  | 0.324917  |
| H         | 7.267411  | -1.459760 | -0.912555 |
| H         | 7.022387  | 2.151506  | 1.411699  |
| H         | -5.353846 | -2.763497 | 2.908148  |
| H         | -5.579347 | -2.931994 | 1.156011  |
| H         | -6.475114 | -1.696444 | 2.051735  |
| H         | -5.138465 | 0.416521  | 2.992898  |
| H         | -4.145992 | -0.760326 | 3.865622  |
| H         | -3.370458 | 0.427550  | 2.793929  |
| H         | -6.672850 | 1.525960  | -1.256706 |
| H         | -2.434955 | 2.234016  | -3.234762 |
| H         | -3.301746 | 1.301832  | -4.473270 |
| H         | -1.536035 | 1.241041  | -4.389338 |
| H         | -1.745194 | -1.297022 | -4.344245 |
| H         | -3.515849 | -1.278580 | -4.198153 |
| H         | -2.529823 | -2.105499 | -2.978582 |
| H         | 1.009486  | -5.429045 | -0.840342 |
| H         | 2.645562  | -5.238693 | -1.483311 |
| H         | 1.266048  | -5.303618 | -2.592038 |
| H         | 3.340604  | -2.900879 | -2.553169 |
| H         | 1.958179  | -3.105077 | -3.637930 |
| H         | 2.093419  | -1.635545 | -2.662124 |
| H         | 4.618608  | -2.545062 | 1.785992  |
| H         | 1.597124  | 0.675322  | 3.393259  |
| H         | 1.514933  | -0.591005 | 4.635080  |
| H         | 0.144315  | 0.497487  | 4.388986  |
| H         | -1.340112 | -1.547257 | 4.161715  |
| H         | 0.021057  | -2.687100 | 4.208276  |
| H         | -1.096645 | -2.692809 | 2.833582  |
| H         | 8.245865  | 0.078133  | 0.782222  |
| C         | -3.036140 | 2.489398  | 0.938463  |
| H         | -3.916807 | 2.112539  | 1.464182  |
| H         | -3.205002 | 2.352821  | -0.136835 |
| H         | -2.970425 | 3.570285  | 1.140608  |
| O         | -1.867088 | 1.825994  | 1.398528  |
| H         | -1.004784 | 2.494642  | 1.071925  |
| <b>17</b> |           |           |           |
| Ni        | -0.438600 | 0.857190  | 0.056279  |

|   |           |           |           |
|---|-----------|-----------|-----------|
| C | 0.966038  | 0.621159  | -1.123149 |
| C | -1.074633 | -0.957103 | -0.019017 |
| C | 2.375051  | 0.533253  | -0.545035 |
| O | 0.791089  | 0.574650  | -2.331584 |
| N | 0.043651  | 2.708090  | 0.269406  |
| N | -2.329007 | -1.390154 | -0.344786 |
| N | -0.397927 | -2.116351 | 0.244753  |
| C | 3.452641  | 1.219613  | -1.403563 |
| H | 2.393328  | 0.907518  | 0.478433  |
| H | 2.612676  | -0.530464 | -0.481242 |
| C | 1.221106  | 3.163025  | 0.994882  |
| C | -0.200257 | 3.591191  | -0.867581 |
| C | -2.423332 | -2.780325 | -0.299607 |
| C | -3.486434 | -0.566987 | -0.575432 |
| C | -1.209674 | -3.237763 | 0.081596  |
| C | 0.975590  | -2.214157 | 0.655617  |
| C | 4.818783  | 0.935675  | -0.831151 |
| H | 3.374795  | 0.846223  | -2.429136 |
| H | 3.265755  | 2.298919  | -1.438786 |
| C | 1.031054  | 4.611238  | 1.449301  |
| H | 1.388535  | 2.524868  | 1.871299  |
| H | 2.133815  | 3.127995  | 0.374116  |
| C | -0.356414 | 5.036904  | -0.396408 |
| H | -1.110419 | 3.277958  | -1.391770 |
| H | 0.627121  | 3.550932  | -1.599249 |
| H | -3.343696 | -3.292428 | -0.529111 |
| C | -4.503584 | -0.588477 | 0.394767  |
| C | -3.585220 | 0.166238  | -1.774165 |
| H | -0.839782 | -4.236169 | 0.248972  |
| C | 1.885566  | -2.846178 | -0.209800 |
| C | 1.352962  | -1.687307 | 1.909467  |
| C | 5.525772  | -0.214694 | -1.207979 |
| C | 5.372611  | 1.764609  | 0.153257  |
| O | 0.784173  | 5.468113  | 0.339767  |
| H | 1.932290  | 4.995577  | 1.940242  |
| H | 0.189732  | 4.666851  | 2.162311  |
| H | -0.452934 | 5.724541  | -1.243999 |
| H | -1.260222 | 5.123831  | 0.232116  |
| C | -4.360744 | -1.316189 | 1.727046  |
| C | -5.675180 | 0.128699  | 0.118595  |
| C | -2.462721 | 0.149186  | -2.802025 |
| C | -4.768562 | 0.880041  | -1.989784 |
| C | 1.500446  | -3.349547 | -1.595638 |
| C | 3.214721  | -2.961953 | 0.218996  |

|   |           |           |           |
|---|-----------|-----------|-----------|
| C | 0.334810  | -1.029948 | 2.835625  |
| C | 2.696509  | -1.810826 | 2.275769  |
| C | 6.749387  | -0.530597 | -0.617115 |
| H | 5.106954  | -0.866950 | -1.970686 |
| C | 6.595942  | 1.452880  | 0.748257  |
| H | 4.837262  | 2.662604  | 0.453587  |
| C | -5.479558 | -2.349804 | 1.930478  |
| C | -4.296509 | -0.322983 | 2.900152  |
| H | -3.413340 | -1.858601 | 1.726547  |
| C | -5.808427 | 0.853227  | -1.060720 |
| H | -6.480947 | 0.130002  | 0.846521  |
| C | -2.460547 | 1.366317  | -3.732698 |
| C | -2.496150 | -1.152734 | -3.623505 |
| H | -1.509895 | 0.174114  | -2.268939 |
| H | -4.883492 | 1.458461  | -2.899545 |
| C | 1.665846  | -4.874961 | -1.694703 |
| C | 2.298347  | -2.632460 | -2.698317 |
| H | 0.447283  | -3.117721 | -1.769805 |
| C | 3.619148  | -2.443465 | 1.443332  |
| H | 3.944041  | -3.435373 | -0.430728 |
| C | 0.957843  | -0.090390 | 3.873043  |
| C | -0.540737 | -2.091551 | 3.526449  |
| H | -0.323558 | -0.412554 | 2.217112  |
| H | 3.032058  | -1.403895 | 3.222438  |
| C | 7.288575  | 0.302103  | 0.366372  |
| H | 7.284505  | -1.424762 | -0.926834 |
| H | 7.009978  | 2.110726  | 1.508046  |
| H | -5.316336 | -2.907709 | 2.859933  |
| H | -5.517477 | -3.069487 | 1.104347  |
| H | -6.463564 | -1.871968 | 2.000006  |
| H | -5.212219 | 0.276569  | 2.969242  |
| H | -4.185117 | -0.867637 | 3.845762  |
| H | -3.445036 | 0.355090  | 2.789084  |
| H | -6.722239 | 1.407431  | -1.256935 |
| H | -2.492572 | 2.305635  | -3.169208 |
| H | -3.304545 | 1.359224  | -4.433493 |
| H | -1.539081 | 1.365214  | -4.323524 |
| H | -1.653050 | -1.176619 | -4.323501 |
| H | -3.425179 | -1.227254 | -4.202689 |
| H | -2.425449 | -2.038783 | -2.984034 |
| H | 1.082624  | -5.394520 | -0.925390 |
| H | 2.714019  | -5.171148 | -1.569628 |
| H | 1.331987  | -5.233746 | -2.675219 |
| H | 3.375928  | -2.805996 | -2.597065 |

|   |           |           |           |
|---|-----------|-----------|-----------|
| H | 1.993680  | -3.007864 | -3.682556 |
| H | 2.113252  | -1.554635 | -2.680653 |
| H | 4.659866  | -2.514701 | 1.745181  |
| H | 1.609334  | 0.653920  | 3.401806  |
| H | 1.543964  | -0.630187 | 4.626353  |
| H | 0.161491  | 0.446879  | 4.399610  |
| H | -1.307449 | -1.607394 | 4.142244  |
| H | 0.066309  | -2.732495 | 4.177984  |
| H | -1.049183 | -2.735205 | 2.801623  |
| H | 8.242283  | 0.059114  | 0.826976  |
| C | -3.154448 | 2.508902  | 0.960884  |
| H | -4.045245 | 1.935980  | 1.214244  |
| H | -3.248560 | 3.505877  | 1.415385  |
| H | -3.121057 | 2.624057  | -0.129881 |
| O | -2.006290 | 1.832062  | 1.465214  |
| H | -1.204895 | 2.435973  | 1.204526  |

**18**

|    |           |           |           |
|----|-----------|-----------|-----------|
| Ni | -0.737558 | 0.721337  | -0.168187 |
| N  | -1.293624 | 2.432695  | -0.377006 |
| C  | 0.585960  | 0.747335  | -1.437313 |
| C  | -0.510474 | 3.630989  | -0.138407 |
| C  | -2.237983 | 2.672017  | -1.461748 |
| C  | -0.756373 | -1.093952 | 0.403235  |
| C  | 1.965303  | 1.108889  | -0.887364 |
| O  | 0.405528  | 0.522032  | -2.621184 |
| C  | -1.431133 | 4.813396  | 0.177569  |
| H  | 0.172185  | 3.472400  | 0.705314  |
| H  | 0.102286  | 3.904050  | -1.020911 |
| C  | -3.137479 | 3.861879  | -1.123753 |
| H  | -2.859448 | 1.783448  | -1.617074 |
| H  | -1.718039 | 2.891728  | -2.413849 |
| N  | -1.952091 | -1.755210 | 0.442181  |
| N  | 0.116845  | -1.983211 | 0.960288  |
| C  | 2.991839  | 1.538025  | -1.950442 |
| H  | 1.852937  | 1.873643  | -0.112773 |
| H  | 2.326339  | 0.215946  | -0.370821 |
| O  | -2.368481 | 5.034363  | -0.869472 |
| H  | -0.860850 | 5.743222  | 0.282814  |
| H  | -1.964185 | 4.617533  | 1.124116  |
| H  | -3.803254 | 4.105821  | -1.959001 |
| H  | -3.752318 | 3.617608  | -0.240928 |
| C  | -1.832364 | -3.014402 | 1.017428  |
| C  | -3.173953 | -1.137003 | 0.001054  |

|   |           |           |           |
|---|-----------|-----------|-----------|
| C | -0.523023 | -3.159579 | 1.345324  |
| C | 1.514056  | -1.712404 | 1.154775  |
| C | 4.389151  | 1.512851  | -1.380492 |
| H | 2.919325  | 0.860223  | -2.805700 |
| H | 2.736508  | 2.540249  | -2.316517 |
| H | -2.677270 | -3.675052 | 1.129840  |
| C | -3.600265 | -1.350057 | -1.320444 |
| C | -3.862164 | -0.303571 | 0.902703  |
| H | 0.013970  | -3.972372 | 1.807650  |
| C | 1.891906  | -0.857685 | 2.205726  |
| C | 2.441712  | -2.274427 | 0.259645  |
| C | 4.803052  | 2.473065  | -0.446160 |
| C | 5.279671  | 0.484096  | -1.712561 |
| C | -2.838092 | -2.244444 | -2.285696 |
| C | -4.767018 | -0.696392 | -1.734471 |
| C | -3.388898 | -0.095508 | 2.334343  |
| C | -5.025118 | 0.322384  | 0.441726  |
| C | 0.881859  | -0.270764 | 3.181401  |
| C | 3.249310  | -0.535191 | 2.318443  |
| C | 2.025257  | -3.183770 | -0.887527 |
| C | 3.788886  | -1.934849 | 0.428173  |
| C | 6.063946  | 2.401817  | 0.145634  |
| H | 4.127260  | 3.282983  | -0.180385 |
| C | 6.545046  | 0.409676  | -1.127322 |
| H | 4.973273  | -0.266480 | -2.436893 |
| C | -2.305157 | -1.446487 | -3.486760 |
| C | -3.706291 | -3.430204 | -2.738991 |
| H | -1.972704 | -2.654075 | -1.757620 |
| C | -5.472357 | 0.130888  | -0.863949 |
| H | -5.121035 | -0.834059 | -2.751591 |
| C | -4.292639 | -0.858743 | 3.317588  |
| C | -3.292711 | 1.392947  | 2.701769  |
| H | -2.382100 | -0.512839 | 2.421464  |
| H | -5.581774 | 0.971734  | 1.110015  |
| C | 0.696321  | 1.236121  | 2.940767  |
| C | 1.266501  | -0.559533 | 4.641043  |
| H | -0.083963 | -0.750493 | 2.999219  |
| C | 4.188847  | -1.061623 | 1.436272  |
| H | 3.572548  | 0.144104  | 3.100994  |
| C | 2.683900  | -4.567719 | -0.765327 |
| C | 2.333886  | -2.540967 | -2.250233 |
| H | 0.943059  | -3.329005 | -0.836153 |
| H | 4.528478  | -2.333801 | -0.258393 |
| C | 6.940763  | 1.366927  | -0.191315 |

|   |           |           |           |
|---|-----------|-----------|-----------|
| H | 6.365396  | 3.156941  | 0.867003  |
| H | 7.221700  | -0.395096 | -1.403459 |
| H | -1.760250 | -2.112424 | -4.167305 |
| H | -3.123539 | -0.988309 | -4.055112 |
| H | -1.618145 | -0.656977 | -3.167384 |
| H | -4.581782 | -3.092467 | -3.305812 |
| H | -4.067082 | -4.012802 | -1.883014 |
| H | -3.128250 | -4.099352 | -3.387100 |
| H | -6.374393 | 0.631469  | -1.204979 |
| H | -3.928505 | -0.740462 | 4.345184  |
| H | -4.318920 | -1.930188 | 3.087582  |
| H | -5.322244 | -0.483438 | 3.279590  |
| H | -4.278498 | 1.872623  | 2.714485  |
| H | -2.861470 | 1.504046  | 3.703954  |
| H | -2.661338 | 1.927697  | 1.985371  |
| H | 1.638959  | 1.779097  | 3.079987  |
| H | 0.339846  | 1.418855  | 1.920195  |
| H | -0.041799 | 1.650286  | 3.637527  |
| H | 1.399163  | -1.633674 | 4.813916  |
| H | 2.198001  | -0.056407 | 4.924080  |
| H | 0.480215  | -0.200496 | 5.315409  |
| H | 5.232783  | -0.776661 | 1.520933  |
| H | 2.330696  | -5.229794 | -1.564478 |
| H | 2.450533  | -5.039827 | 0.196081  |
| H | 3.775013  | -4.500316 | -0.846622 |
| H | 2.023477  | -3.209874 | -3.061904 |
| H | 3.407218  | -2.351137 | -2.367326 |
| H | 1.802061  | -1.593662 | -2.375064 |
| H | 7.925193  | 1.313173  | 0.265613  |

### TS19

|    |           |           |           |
|----|-----------|-----------|-----------|
| Ni | -0.706232 | 0.717010  | -0.076578 |
| N  | -0.504440 | 2.457763  | -0.704414 |
| C  | 0.633894  | 0.886267  | -1.365655 |
| C  | 0.197589  | 3.555503  | -0.069763 |
| C  | -1.314798 | 2.929134  | -1.812431 |
| C  | -0.964211 | -1.063649 | 0.458465  |
| C  | 2.032019  | 0.994298  | -0.778370 |
| O  | 0.443672  | 0.633209  | -2.548536 |
| C  | -0.815102 | 4.603451  | 0.404060  |
| H  | 0.770939  | 3.197083  | 0.791252  |
| H  | 0.899401  | 4.048170  | -0.769593 |
| C  | -2.305061 | 3.979397  | -1.311480 |
| H  | -1.853976 | 2.090050  | -2.262017 |

|   |           |           |           |
|---|-----------|-----------|-----------|
| H | -0.686680 | 3.385163  | -2.600315 |
| N | -0.161024 | -2.062311 | 0.933500  |
| N | -2.217048 | -1.608444 | 0.522711  |
| C | 3.056553  | 1.663363  | -1.714312 |
| H | 2.012395  | 1.493436  | 0.191990  |
| H | 2.350892  | -0.034500 | -0.586552 |
| O | -1.628347 | 5.059353  | -0.670142 |
| H | -0.312220 | 5.490955  | 0.805417  |
| H | -1.445633 | 4.163372  | 1.195565  |
| H | -2.870401 | 4.424497  | -2.137993 |
| H | -3.012616 | 3.506532  | -0.609650 |
| C | -0.896546 | -3.192229 | 1.283833  |
| C | 1.269048  | -1.956261 | 1.020206  |
| C | -2.197983 | -2.904864 | 1.023511  |
| C | -3.374468 | -0.877198 | 0.084171  |
| C | 4.450786  | 1.474704  | -1.171029 |
| H | 2.964835  | 1.214314  | -2.707703 |
| H | 2.817581  | 2.728745  | -1.815452 |
| H | -0.424148 | -4.077483 | 1.678838  |
| C | 1.829781  | -1.239662 | 2.091622  |
| C | 2.047887  | -2.537487 | 0.003623  |
| H | -3.098003 | -3.487238 | 1.142085  |
| C | -3.783239 | -1.010394 | -1.253983 |
| C | -4.005595 | -0.009350 | 0.992820  |
| C | 4.933604  | 2.286597  | -0.135382 |
| C | 5.259755  | 0.424312  | -1.623994 |
| C | 0.975924  | -0.614753 | 3.185404  |
| C | 3.220846  | -1.088146 | 2.110555  |
| C | 1.431416  | -3.288748 | -1.167907 |
| C | 3.436457  | -2.378060 | 0.082371  |
| C | -3.074739 | -1.937104 | -2.230055 |
| C | -4.869338 | -0.235191 | -1.675951 |
| C | -3.517202 | 0.154959  | 2.424223  |
| C | -5.086277 | 0.744738  | 0.522219  |
| C | 6.184993  | 2.053578  | 0.435550  |
| H | 4.318346  | 3.107841  | 0.226127  |
| C | 6.514759  | 0.189205  | -1.060245 |
| H | 4.895717  | -0.216224 | -2.423715 |
| C | 1.456224  | -1.017351 | 4.588434  |
| C | 0.927107  | 0.913985  | 3.029830  |
| H | -0.046340 | -0.986867 | 3.069668  |
| C | 4.018126  | -1.649347 | 1.116814  |
| H | 3.684089  | -0.516643 | 2.908568  |
| C | 1.786655  | -2.630950 | -2.511619 |

|   |           |           |           |
|---|-----------|-----------|-----------|
| C | 1.841914  | -4.770540 | -1.147146 |
| H | 0.343663  | -3.245337 | -1.067016 |
| H | 4.066009  | -2.804382 | -0.692379 |
| C | -2.398649 | -1.144924 | -3.361214 |
| C | -4.037861 | -2.998851 | -2.786249 |
| H | -2.285912 | -2.464666 | -1.686871 |
| C | -5.513648 | 0.634651  | -0.799232 |
| H | -5.207234 | -0.308445 | -2.705236 |
| C | -4.642439 | -0.069967 | 3.445947  |
| C | -2.859517 | 1.532208  | 2.614127  |
| H | -2.750166 | -0.602399 | 2.609399  |
| H | -5.591149 | 1.431390  | 1.194715  |
| C | 6.981180  | 1.001781  | -0.024488 |
| H | 6.541531  | 2.695853  | 1.236753  |
| H | 7.129320  | -0.627306 | -1.430961 |
| H | 1.495303  | -2.106989 | 4.700004  |
| H | 0.772584  | -0.621420 | 5.348608  |
| H | 2.454705  | -0.621582 | 4.805846  |
| H | 1.930798  | 1.351281  | 3.093751  |
| H | 0.495383  | 1.180328  | 2.057457  |
| H | 0.309101  | 1.363632  | 3.816102  |
| H | 5.093127  | -1.501102 | 1.137279  |
| H | 2.868832  | -2.638277 | -2.688419 |
| H | 1.313791  | -3.181533 | -3.333999 |
| H | 1.436509  | -1.595447 | -2.554315 |
| H | 1.354165  | -5.314211 | -1.964796 |
| H | 2.925465  | -4.884850 | -1.269646 |
| H | 1.561147  | -5.252359 | -0.203233 |
| H | -3.135531 | -0.578185 | -3.943645 |
| H | -1.890205 | -1.832633 | -4.048525 |
| H | -1.650045 | -0.447026 | -2.973873 |
| H | -4.837610 | -2.544547 | -3.382779 |
| H | -4.507774 | -3.574844 | -1.980217 |
| H | -3.497589 | -3.698653 | -3.434484 |
| H | -6.352082 | 1.231365  | -1.147824 |
| H | -5.107386 | -1.054003 | 3.316571  |
| H | -4.244691 | -0.012514 | 4.465969  |
| H | -5.429224 | 0.687589  | 3.355783  |
| H | -2.460467 | 1.632681  | 3.630513  |
| H | -2.035481 | 1.675492  | 1.904798  |
| H | -3.581033 | 2.341332  | 2.450018  |
| H | 7.958385  | 0.822100  | 0.415496  |



|    |           |           |           |
|----|-----------|-----------|-----------|
| C  | -0.829263 | -1.282888 | 0.366791  |
| N  | -0.083012 | -2.297537 | 0.914547  |
| N  | -2.035477 | -1.410434 | 1.003456  |
| C  | -0.808434 | -3.032927 | 1.846529  |
| C  | 1.286856  | -2.530927 | 0.549586  |
| Ni | -0.354328 | -0.189989 | -1.067013 |
| C  | -2.042019 | -2.469345 | 1.905800  |
| C  | -3.138495 | -0.520902 | 0.776193  |
| H  | -0.383713 | -3.877373 | 2.366159  |
| C  | 1.559419  | -3.145504 | -0.683522 |
| C  | 2.300768  | -2.097921 | 1.427726  |
| H  | -2.913357 | -2.715963 | 2.491536  |
| C  | -3.329063 | 0.547227  | 1.669242  |
| C  | -3.966520 | -0.739090 | -0.338693 |
| C  | 0.457760  | -3.648336 | -1.605048 |
| C  | 2.902872  | -3.293617 | -1.050908 |
| C  | 1.963715  | -1.420080 | 2.751061  |
| C  | 3.625788  | -2.272176 | 1.016474  |
| C  | -2.386103 | 0.804425  | 2.835724  |
| C  | -4.408341 | 1.405583  | 1.430400  |
| C  | -3.720971 | -1.880342 | -1.314467 |
| C  | -5.019659 | 0.158862  | -0.546787 |
| C  | 0.421655  | -2.846989 | -2.915476 |
| C  | 0.599188  | -5.154849 | -1.876316 |
| H  | -0.501195 | -3.496208 | -1.102426 |
| C  | 3.924794  | -2.857270 | -0.213739 |
| H  | 3.146948  | -3.757096 | -2.001951 |
| C  | 3.023663  | -1.645672 | 3.837046  |
| C  | 1.717654  | 0.085083  | 2.541843  |
| H  | 1.027866  | -1.852726 | 3.119289  |
| H  | 4.434118  | -1.938628 | 1.657249  |
| C  | -3.121545 | 0.719288  | 4.182648  |
| C  | -1.666831 | 2.154384  | 2.675858  |
| H  | -1.617719 | 0.027405  | 2.828193  |
| C  | -5.244284 | 1.216389  | 0.332285  |
| H  | -4.584210 | 2.239743  | 2.103103  |
| C  | -4.978462 | -2.736395 | -1.528972 |
| C  | -3.176588 | -1.343258 | -2.648463 |
| H  | -2.952475 | -2.529900 | -0.886077 |
| H  | -5.671156 | 0.028223  | -1.405596 |
| H  | 1.352728  | -2.967095 | -3.482083 |
| H  | -0.407310 | -3.182523 | -3.549484 |
| H  | 0.292783  | -1.774594 | -2.716471 |
| H  | -0.234320 | -5.508943 | -2.494503 |

|   |           |           |           |
|---|-----------|-----------|-----------|
| H | 1.528593  | -5.384512 | -2.409875 |
| H | 0.598515  | -5.728969 | -0.942537 |
| H | 4.961393  | -2.979026 | -0.516144 |
| H | 3.958567  | -1.120956 | 3.610136  |
| H | 3.253063  | -2.709444 | 3.967885  |
| H | 2.659711  | -1.256216 | 4.794572  |
| H | 2.631320  | 0.577087  | 2.190212  |
| H | 1.417630  | 0.556431  | 3.485837  |
| H | 0.933849  | 0.261199  | 1.801216  |
| H | -3.903366 | 1.483995  | 4.260622  |
| H | -2.420511 | 0.874064  | 5.011395  |
| H | -3.597620 | -0.258834 | 4.318591  |
| H | -0.930904 | 2.287623  | 3.478141  |
| H | -2.374677 | 2.990187  | 2.734135  |
| H | -1.148570 | 2.214976  | 1.714008  |
| H | -6.070253 | 1.900045  | 0.156550  |
| H | -5.363947 | -3.124500 | -0.579132 |
| H | -4.748019 | -3.590172 | -2.177041 |
| H | -5.781956 | -2.166700 | -2.009517 |
| H | -2.961592 | -2.168227 | -3.337921 |
| H | -3.900966 | -0.676570 | -3.131673 |
| H | -2.250630 | -0.774495 | -2.490201 |
| C | 0.372426  | 1.637068  | -1.210912 |
| C | 1.764218  | 1.695707  | -0.591020 |
| N | -0.517994 | 2.695893  | -0.861753 |
| O | 0.229194  | 1.008193  | -2.352466 |
| C | 2.854143  | 2.247998  | -1.535103 |
| H | 1.747021  | 2.259250  | 0.347313  |
| H | 2.048015  | 0.673748  | -0.330678 |
| C | -1.831207 | 2.620414  | -1.502776 |
| C | 0.022923  | 4.060463  | -0.915022 |
| C | 4.222152  | 2.076404  | -0.920645 |
| H | 2.671652  | 3.303775  | -1.764392 |
| H | 2.785242  | 1.695475  | -2.478891 |
| C | -2.766755 | 3.656982  | -0.896223 |
| H | -2.231805 | 1.615185  | -1.338200 |
| H | -1.755081 | 2.780271  | -2.590116 |
| C | -0.983499 | 5.043917  | -0.328522 |
| H | 0.949415  | 4.115168  | -0.338370 |
| H | 0.248687  | 4.355516  | -1.955445 |
| C | 4.804308  | 0.801869  | -0.846173 |
| C | 4.910213  | 3.156021  | -0.354168 |
| O | -2.233667 | 4.975394  | -0.996934 |
| H | -3.721036 | 3.664857  | -1.431427 |

|   |           |           |           |
|---|-----------|-----------|-----------|
| H | -2.960612 | 3.414004  | 0.158110  |
| H | -0.620709 | 6.070405  | -0.443404 |
| H | -1.116056 | 4.835934  | 0.746503  |
| C | 6.038757  | 0.614309  | -0.226126 |
| H | 4.278270  | -0.048388 | -1.272804 |
| C | 6.147807  | 2.973279  | 0.267189  |
| H | 4.471066  | 4.150191  | -0.401710 |
| C | 6.716521  | 1.700720  | 0.334058  |
| H | 6.475493  | -0.380211 | -0.182658 |
| H | 6.667030  | 3.825660  | 0.697758  |
| H | 7.679769  | 1.555976  | 0.815794  |

**21**

|   |           |           |           |
|---|-----------|-----------|-----------|
| C | -0.229492 | 0.290009  | -0.112767 |
| C | -1.407259 | 1.198359  | 0.268269  |
| C | 1.111508  | 1.011816  | 0.002565  |
| C | -2.724732 | 0.467076  | 0.155979  |
| H | -1.402230 | 2.079473  | -0.381019 |
| H | -1.258292 | 1.564559  | 1.288669  |
| H | -0.364496 | -0.081276 | -1.136594 |
| H | -0.227089 | -0.597950 | 0.532677  |
| N | 2.232310  | 0.307645  | -0.353733 |
| O | 1.177545  | 2.175048  | 0.399588  |
| C | -3.442987 | 0.462226  | -1.047027 |
| C | -3.235421 | -0.260359 | 1.239275  |
| C | 2.275766  | -1.072387 | -0.825575 |
| C | 3.549472  | 0.933969  | -0.264737 |
| C | -4.638075 | -0.248476 | -1.166196 |
| H | -3.062460 | 1.026604  | -1.895595 |
| C | -4.429836 | -0.972954 | 1.125921  |
| H | -2.692458 | -0.261500 | 2.181966  |
| C | 3.255551  | -1.872783 | 0.034613  |
| H | 1.287235  | -1.528256 | -0.783342 |
| H | 2.616331  | -1.087637 | -1.870918 |
| C | 4.474953  | 0.057359  | 0.573297  |
| H | 3.425443  | 1.921507  | 0.179859  |
| H | 3.966017  | 1.046273  | -1.275662 |
| C | -5.135522 | -0.969707 | -0.078991 |
| H | -5.183280 | -0.235152 | -2.106310 |
| H | -4.812229 | -1.526282 | 1.979663  |
| O | 4.540474  | -1.268576 | 0.055835  |
| H | 3.388793  | -2.879289 | -0.373386 |
| H | 2.856240  | -1.956011 | 1.059392  |
| H | 5.496837  | 0.447480  | 0.557465  |

|   |           |           |           |
|---|-----------|-----------|-----------|
| H | 4.119478  | 0.037932  | 1.616489  |
| H | -6.067718 | -1.520661 | -0.168354 |

**22**

|   |             |             |             |
|---|-------------|-------------|-------------|
| C | 2.72127400  | 0.86342500  | 0.34374400  |
| C | 3.11662800  | -0.45963100 | 0.12842800  |
| C | 2.17088400  | -1.42142300 | -0.23474900 |
| C | 0.83043600  | -1.06587900 | -0.37445300 |
| C | 0.42827000  | 0.25891600  | -0.15331400 |
| C | 1.38376100  | 1.22195900  | 0.19904500  |
| H | 3.45614500  | 1.61320500  | 0.62245800  |
| H | 4.16059300  | -0.73965800 | 0.23891300  |
| H | 2.47891000  | -2.44768500 | -0.41344000 |
| H | 0.09838700  | -1.80824400 | -0.67284200 |
| H | 1.05665900  | 2.24433800  | 0.35571100  |
| C | -0.99408100 | 0.69464900  | -0.28278900 |
| O | -1.32309500 | 1.87260500  | -0.32438500 |
| C | -2.30201400 | -1.22117000 | 0.68815500  |
| C | -3.25977800 | -0.21149000 | 0.13475100  |
| H | -2.40707000 | -2.27398800 | 0.43644300  |
| H | -4.06849300 | -0.53632400 | -0.51531200 |
| H | -3.46212600 | 0.68145900  | 0.72210900  |
| N | -1.92715100 | -0.33894600 | -0.41339800 |
| H | -1.85971700 | -1.01896900 | 1.66178500  |

**23**

|   |             |             |             |
|---|-------------|-------------|-------------|
| C | -3.35622800 | 0.50798300  | 0.72656500  |
| C | -3.68598900 | -0.70106100 | 0.10810900  |
| C | -2.72425500 | -1.38520300 | -0.63710800 |
| C | -1.43064000 | -0.87416600 | -0.74766500 |
| C | -1.09125300 | 0.33208700  | -0.12146000 |
| C | -2.07033200 | 1.02803200  | 0.60020100  |
| H | -4.10439200 | 1.04821800  | 1.29988700  |
| H | -4.69111100 | -1.10331300 | 0.19969200  |
| H | -2.98133600 | -2.31491400 | -1.13704100 |
| H | -0.69336800 | -1.40200400 | -1.34361300 |
| H | -1.80720300 | 1.97885700  | 1.05184800  |
| C | 0.25994100  | 0.97352200  | -0.25828400 |
| O | 0.36077400  | 2.19698300  | -0.38991900 |
| C | 2.68876600  | 0.81096900  | -0.34016100 |
| C | 1.46350300  | -1.20350800 | 0.27476900  |
| C | 2.86778800  | -1.24690200 | 0.88846400  |
| H | 2.75913900  | 1.61721700  | 0.39972800  |
| H | 2.82626800  | 1.26166500  | -1.32757000 |

|   |            |             |             |
|---|------------|-------------|-------------|
| H | 0.66776500 | -1.40844100 | 0.99347200  |
| H | 1.38147100 | -1.93414400 | -0.54090200 |
| H | 2.84381200 | -0.82768100 | 1.90142200  |
| H | 3.26383200 | -2.26480000 | 0.94828600  |
| N | 1.36428300 | 0.17257900  | -0.24328500 |
| C | 3.67030300 | -0.32947900 | -0.04526600 |
| H | 3.92243400 | -0.86341300 | -0.96940600 |
| H | 4.60174200 | 0.03294000  | 0.39851700  |

**24**

|   |             |             |             |
|---|-------------|-------------|-------------|
| C | 3.71275700  | -0.22657100 | -0.72751700 |
| C | 3.94660200  | -0.87801100 | 0.48625800  |
| C | 2.94039200  | -0.92892700 | 1.45260900  |
| C | 1.69966500  | -0.34308300 | 1.20175200  |
| C | 1.45483700  | 0.30117300  | -0.01890800 |
| C | 2.47695500  | 0.36633400  | -0.97426000 |
| H | 4.49551000  | -0.17841200 | -1.47931000 |
| H | 4.91180500  | -1.33686100 | 0.68169900  |
| H | 3.12333800  | -1.41753500 | 2.40547300  |
| H | 0.93920700  | -0.36275600 | 1.97762700  |
| H | 2.28012400  | 0.88808600  | -1.90463300 |
| C | 0.14794100  | 0.96234200  | -0.35652500 |
| O | 0.07702900  | 1.85393300  | -1.20405500 |
| N | -0.94674600 | 0.50472100  | 0.31266000  |
| C | -2.27040900 | 1.08252700  | 0.12117400  |
| C | -2.54695400 | 2.24895000  | 1.07019400  |
| H | -2.48016000 | 1.93107300  | 2.11733500  |
| H | -1.81997200 | 3.05096200  | 0.90676900  |
| H | -3.55123400 | 2.65437200  | 0.89858200  |
| H | -2.33123900 | 1.41993400  | -0.91665400 |
| H | -3.00744600 | 0.28505700  | 0.26210500  |
| H | -0.84864300 | -0.27686200 | 0.94314800  |

**25**

|   |            |             |             |
|---|------------|-------------|-------------|
| C | 4.16310700 | -1.17330200 | 0.78875500  |
| C | 4.69202800 | -0.99685200 | -0.49239800 |
| C | 4.01689400 | -0.20288900 | -1.42162700 |
| C | 2.80462400 | 0.39656800  | -1.07950900 |
| C | 2.26480400 | 0.21316400  | 0.20048900  |
| C | 2.96231400 | -0.55883000 | 1.13827100  |
| H | 4.69095400 | -1.78221300 | 1.51718000  |
| H | 5.63192300 | -1.46986000 | -0.76273700 |
| H | 4.43561900 | -0.04673400 | -2.41174800 |
| H | 2.28829600 | 1.02768300  | -1.79659900 |

|   |             |             |             |
|---|-------------|-------------|-------------|
| H | 2.55256300  | -0.66694600 | 2.13747100  |
| C | 0.99810500  | 0.88294500  | 0.64458600  |
| O | 0.91925700  | 1.41000100  | 1.75217800  |
| N | -0.05135500 | 0.93434800  | -0.24365000 |
| C | -0.38884800 | -0.07709500 | -1.25245000 |
| H | -0.88809400 | 0.42725500  | -2.08629200 |
| H | 0.54022100  | -0.49817400 | -1.63732800 |
| C | -1.27459000 | -1.17816100 | -0.70414100 |
| C | -2.61523700 | -1.27759000 | -1.08712000 |
| C | -0.76108900 | -2.10181700 | 0.21703800  |
| C | -3.43317900 | -2.28194400 | -0.56341700 |
| H | -3.02140400 | -0.56548800 | -1.80191100 |
| C | -1.57422500 | -3.10426300 | 0.74157600  |
| H | 0.28043600  | -2.03309100 | 0.52114100  |
| C | -2.91393700 | -3.19666500 | 0.35245700  |
| H | -4.47325200 | -2.34767300 | -0.87089300 |
| H | -1.16385500 | -3.81612200 | 1.45256200  |
| H | -3.54737700 | -3.97859000 | 0.76195700  |
| H | -0.85904400 | 1.38169000  | 0.18087400  |

**26**

|   |             |             |             |
|---|-------------|-------------|-------------|
| C | 4.24951400  | -1.22431800 | 0.66970300  |
| C | 4.73439800  | -0.97759700 | -0.61745700 |
| C | 4.01117000  | -0.16092700 | -1.48868900 |
| C | 2.79643400  | 0.39174100  | -1.08244900 |
| C | 2.29989100  | 0.13772700  | 0.20333700  |
| C | 3.04579100  | -0.65759600 | 1.08246000  |
| H | 4.81457400  | -1.85147700 | 1.35348800  |
| H | 5.67715700  | -1.41312700 | -0.93669600 |
| H | 4.39453700  | 0.05076500  | -2.48290900 |
| H | 2.24587900  | 1.04238500  | -1.75454400 |
| H | 2.66949200  | -0.82106600 | 2.08701100  |
| C | 1.03836600  | 0.76473200  | 0.72047400  |
| O | 0.97698800  | 1.19574200  | 1.87231200  |
| N | -0.02262400 | 0.88392400  | -0.13775800 |
| H | -0.81307100 | 1.34380500  | 0.30424100  |
| C | -0.35263300 | 0.06613200  | -1.29896500 |
| C | -1.61386800 | -0.79284600 | -1.10892800 |
| C | -0.66954700 | 0.88515700  | -2.56669800 |
| H | 0.49404400  | -0.59601100 | -1.49102300 |
| C | -1.94244900 | -1.24442400 | -2.53876300 |
| H | -2.42040900 | -0.16237000 | -0.70781400 |
| H | -1.45815400 | -1.61978100 | -0.40861200 |
| C | -1.54635700 | -0.04297900 | -3.44622800 |

|   |             |             |             |
|---|-------------|-------------|-------------|
| H | 0.23882600  | 1.22811300  | -3.07230500 |
| H | -1.22805300 | 1.78161900  | -2.27046400 |
| H | -1.33589400 | -2.12213700 | -2.79234200 |
| H | -2.99074400 | -1.53470700 | -2.65870700 |
| H | -1.00563100 | -0.38658900 | -4.33374600 |
| H | -2.43247600 | 0.49033500  | -3.80477400 |

**27**

|   |             |             |             |
|---|-------------|-------------|-------------|
| C | 4.02435100  | -1.33941200 | 0.76019200  |
| C | 4.47447400  | -1.31285900 | -0.56236800 |
| C | 3.85824300  | -0.47114700 | -1.48983700 |
| C | 2.78542200  | 0.33116700  | -1.10172100 |
| C | 2.32102100  | 0.29906900  | 0.22115400  |
| C | 2.95998300  | -0.53157100 | 1.15133300  |
| H | 4.50567400  | -1.98806000 | 1.48644500  |
| H | 5.30816900  | -1.93927100 | -0.86674300 |
| H | 4.21794100  | -0.43094200 | -2.51390300 |
| H | 2.34275800  | 1.00799300  | -1.82752500 |
| H | 2.60602800  | -0.52988900 | 2.17655000  |
| C | 1.18390800  | 1.14286300  | 0.72002800  |
| O | 1.09407500  | 1.46186000  | 1.90318600  |
| N | 0.26787000  | 1.50079500  | -0.24068600 |
| H | 0.38294400  | 1.07211500  | -1.14903100 |
| C | -0.88721100 | 2.29489200  | -0.11001000 |
| C | -1.70802200 | 2.41572200  | -1.24333300 |
| C | -1.23865200 | 2.96525200  | 1.07169000  |
| C | -2.86195400 | 3.19175100  | -1.19924800 |
| H | -1.43501300 | 1.89603000  | -2.15944500 |
| C | -2.39834900 | 3.74020300  | 1.09855000  |
| H | -0.61138100 | 2.86717400  | 1.94533700  |
| C | -3.21574900 | 3.86127800  | -0.02571400 |
| H | -3.48462900 | 3.27229200  | -2.08589200 |
| H | -2.66199500 | 4.25508400  | 2.01843900  |
| H | -4.11598500 | 4.46751500  | 0.01063300  |

**28**

|   |             |             |             |
|---|-------------|-------------|-------------|
| C | -4.43318500 | -0.98204300 | 0.61448300  |
| C | -4.64700400 | -1.73243000 | -0.54475600 |
| C | -3.56177100 | -2.27062100 | -1.24078900 |
| C | -2.26241800 | -2.04032300 | -0.79128200 |
| C | -2.04568300 | -1.28385200 | 0.36771400  |
| C | -3.13690600 | -0.76916200 | 1.07752500  |
| H | -5.27667200 | -0.56626700 | 1.15786000  |
| H | -5.65864600 | -1.90229400 | -0.90247000 |

|   |             |             |             |
|---|-------------|-------------|-------------|
| H | -3.72789200 | -2.86921600 | -2.13176300 |
| H | -1.41430500 | -2.46132700 | -1.32357000 |
| H | -2.95438100 | -0.19490700 | 1.97976200  |
| C | -0.67283500 | -1.06227300 | 0.91416700  |
| O | -0.44000800 | -1.13284900 | 2.10461400  |
| N | 0.32602700  | -0.74035800 | -0.04397400 |
| C | 1.66703800  | -1.00976500 | 0.28082200  |
| O | 2.01030000  | -1.92989800 | 0.99083800  |
| O | 2.48448500  | -0.13200500 | -0.33149300 |
| C | 3.95207300  | -0.27962400 | -0.25951300 |
| C | 4.37030000  | -1.61983600 | -0.86393400 |
| H | 5.46254500  | -1.65945400 | -0.93770400 |
| H | 4.03210100  | -2.45664800 | -0.25115600 |
| H | 3.95807700  | -1.72926000 | -1.87328400 |
| C | 4.41432500  | -0.11891200 | 1.18795100  |
| H | 5.50940500  | -0.11226700 | 1.22228400  |
| H | 4.05513800  | 0.83039100  | 1.60022300  |
| H | 4.04781300  | -0.93490100 | 1.81187200  |
| C | 4.43968700  | 0.88298200  | -1.12156600 |
| H | 4.08951400  | 1.83880000  | -0.71825500 |
| H | 5.53410300  | 0.89736000  | -1.14447700 |
| H | 4.07379600  | 0.78637600  | -2.14924800 |
| C | -0.03355000 | 0.19950000  | -1.13384900 |
| H | -0.77629100 | -0.27311200 | -1.77728200 |
| H | 0.86804500  | 0.34774100  | -1.72521800 |
| C | -0.56761800 | 1.51792300  | -0.61684300 |
| C | -1.83612700 | 1.96328800  | -1.00029100 |
| C | 0.18958800  | 2.29676000  | 0.26815000  |
| C | -2.33825800 | 3.17491200  | -0.52099400 |
| H | -2.43839200 | 1.35168000  | -1.66709100 |
| C | -0.31171900 | 3.50397700  | 0.75118300  |
| H | 1.16999700  | 1.94893900  | 0.57914500  |
| C | -1.57679900 | 3.94776400  | 0.35581200  |
| H | -3.32691000 | 3.50769100  | -0.82499400 |
| H | 0.28386600  | 4.09939200  | 1.43776200  |
| H | -1.96739200 | 4.88823500  | 0.73452500  |

**29**

|   |             |             |             |
|---|-------------|-------------|-------------|
| C | -3.35817500 | -0.77091200 | 0.43828300  |
| C | -3.72576500 | 0.36470300  | -0.28844700 |
| C | -2.74404600 | 1.18213700  | -0.85288700 |
| C | -1.39564800 | 0.87738200  | -0.67562100 |
| C | -1.02218900 | -0.25775700 | 0.05770400  |
| C | -2.01215900 | -1.08904100 | 0.59900100  |



|   |             |             |             |
|---|-------------|-------------|-------------|
| H | -4.12098700 | -1.41034700 | 0.87274700  |
| H | -4.77613600 | 0.60876800  | -0.41982100 |
| H | -3.02817900 | 2.05544800  | -1.43266000 |
| H | -0.63397100 | 1.50720400  | -1.12408200 |
| H | -1.71124200 | -1.97887900 | 1.14197300  |
| C | 0.40448600  | -0.68612300 | 0.18861800  |
| O | 0.70367700  | -1.87109700 | 0.17813500  |
| N | 1.37488300  | 0.32996800  | 0.28668100  |
| C | 1.09569800  | 1.58197600  | 1.00592500  |
| H | 1.83195800  | 1.70216900  | 1.80318000  |
| H | 1.16883100  | 2.44583800  | 0.33950300  |
| H | 0.09876600  | 1.53688000  | 1.43863500  |
| C | 2.71248700  | 0.16287300  | -0.11910600 |
| O | 3.51930300  | 1.04204600  | 0.14287600  |
| C | 3.09971800  | -1.06025100 | -0.91643700 |
| H | 3.18340500  | -1.93233900 | -0.26324500 |
| H | 2.36469800  | -1.30647900 | -1.68693300 |
| H | 4.06880900  | -0.85182800 | -1.37436200 |

**30**

|   |             |             |             |
|---|-------------|-------------|-------------|
| C | 3.63049200  | 0.35831800  | -0.33969700 |
| C | 3.72418000  | -0.41899000 | 0.81894200  |
| C | 2.56695000  | -0.86713800 | 1.45998700  |
| C | 1.31465000  | -0.54484500 | 0.94321900  |
| C | 1.21574600  | 0.23392600  | -0.21936100 |
| C | 2.38218300  | 0.68781700  | -0.85546800 |
| H | 4.53100700  | 0.70504200  | -0.83758600 |
| H | 4.69983000  | -0.67478700 | 1.22222500  |
| H | 2.64057100  | -1.46794400 | 2.36137600  |
| H | 0.41711300  | -0.89004100 | 1.44452000  |
| H | 2.28855000  | 1.29097700  | -1.75191600 |
| C | -0.08677600 | 0.63553700  | -0.79036800 |
| O | -0.22656800 | 1.45078600  | -1.67374300 |
| N | -1.27988700 | 0.03034300  | -0.17281200 |
| C | -1.51337400 | -1.29738100 | -0.60116800 |
| O | -0.73658300 | -1.77077300 | -1.41465000 |
| C | -2.67486500 | -2.06797400 | -0.03683600 |
| H | -2.66003800 | -2.07444000 | 1.05616000  |
| H | -3.62379300 | -1.61388800 | -0.33377700 |
| H | -2.60754500 | -3.08592400 | -0.42590000 |
| C | -2.13266600 | 0.82418900  | 0.62152300  |
| O | -3.18979400 | 0.40549400  | 1.05592300  |
| C | -1.63499600 | 2.22341700  | 0.90924300  |
| H | -0.58864100 | 2.22743800  | 1.23273100  |

|   |             |            |            |
|---|-------------|------------|------------|
| H | -1.70714800 | 2.84321300 | 0.01006800 |
| H | -2.26329500 | 2.64947200 | 1.69248900 |

**31**

|   |             |             |             |
|---|-------------|-------------|-------------|
| C | 3.47713300  | -0.78532200 | 0.59081100  |
| C | 3.19934400  | -1.81139000 | -0.31533200 |
| C | 2.06867300  | -1.73154800 | -1.13118500 |
| C | 1.20568200  | -0.64174900 | -1.02886200 |
| C | 1.47473300  | 0.38574900  | -0.11476600 |
| C | 2.62599800  | 0.31399200  | 0.68013100  |
| H | 4.35995500  | -0.83862000 | 1.22166100  |
| H | 3.86505700  | -2.66678100 | -0.39044700 |
| H | 1.85711800  | -2.51951700 | -1.84840400 |
| H | 0.32920700  | -0.58749700 | -1.66441700 |
| H | 2.84183600  | 1.13035200  | 1.36146800  |
| C | 0.63598700  | 1.62502400  | -0.00116900 |
| O | 1.16089400  | 2.71748700  | 0.21062100  |
| N | -0.72802500 | 1.52108300  | -0.19563800 |
| C | -1.46653300 | 0.31976700  | 0.03534300  |
| C | -1.26892700 | -0.42730600 | 1.20153800  |
| C | -2.41356700 | -0.10140900 | -0.90578800 |
| C | -1.99175200 | -1.60181800 | 1.40813000  |
| H | -0.54501400 | -0.08971700 | 1.93579200  |
| C | -3.14672900 | -1.26630900 | -0.68548000 |
| H | -2.55742300 | 0.47789400  | -1.81312900 |
| C | -2.93358900 | -2.02416600 | 0.46851400  |
| H | -1.82473300 | -2.18070600 | 2.31195600  |
| H | -3.87647100 | -1.58860600 | -1.42282300 |
| H | -3.49963900 | -2.93605100 | 0.63463900  |
| C | -1.47745500 | 2.78014600  | -0.21151800 |
| H | -2.46665600 | 2.59897300  | -0.63421600 |
| H | -1.59211600 | 3.18575800  | 0.80168300  |
| H | -0.94505600 | 3.51366600  | -0.81831700 |

**32**

|   |             |             |             |
|---|-------------|-------------|-------------|
| C | -5.50556700 | 0.06444200  | -1.22296800 |
| C | -5.92252500 | 0.12370000  | 0.10978000  |
| C | -4.99733800 | 0.38688200  | 1.12202100  |
| C | -3.65336500 | 0.57468300  | 0.80821900  |
| C | -3.23122100 | 0.50882900  | -0.52629100 |
| C | -4.16658900 | 0.26969200  | -1.54192100 |
| H | -6.22519900 | -0.13692400 | -2.01111800 |
| H | -6.96890600 | -0.03049200 | 0.35806400  |
| H | -5.32177600 | 0.44526600  | 2.15669000  |

|   |             |             |             |
|---|-------------|-------------|-------------|
| H | -2.93724700 | 0.78561700  | 1.59511600  |
| H | -3.82858700 | 0.24323800  | -2.57249000 |
| C | -1.82951000 | 0.80097200  | -0.92409100 |
| O | -1.55615500 | 1.36657100  | -1.96969100 |
| N | -0.80212100 | 0.50180000  | 0.01099500  |
| S | -0.74986900 | -0.95922600 | 0.95201300  |
| O | -0.65833800 | -0.57863400 | 2.36459600  |
| O | -1.83067600 | -1.82450400 | 0.47930800  |
| C | 0.81053500  | -1.64566000 | 0.44396000  |
| C | 0.86931900  | -2.35333400 | -0.75737200 |
| C | 1.94916800  | -1.42436800 | 1.21805100  |
| C | 2.09958200  | -2.84104300 | -1.18741500 |
| H | -0.03004100 | -2.51667700 | -1.34144100 |
| C | 3.16971600  | -1.91949700 | 0.76948700  |
| H | 1.87670500  | -0.86405500 | 2.14253400  |
| C | 3.26499800  | -2.63053600 | -0.43547100 |
| H | 2.15822600  | -3.39348800 | -2.12107000 |
| H | 4.06462400  | -1.74686400 | 1.36092300  |
| C | 4.58894000  | -3.18177400 | -0.89712300 |
| H | 4.78772700  | -4.15609100 | -0.43103400 |
| H | 4.60630400  | -3.32798400 | -1.98169000 |
| H | 5.41577600  | -2.51730900 | -0.62521200 |
| C | 0.43803600  | 1.23293800  | -0.04098300 |
| C | 1.28490400  | 1.13651500  | -1.14856900 |
| C | 0.80022600  | 1.99803800  | 1.06899400  |
| C | 2.50012200  | 1.81757100  | -1.14134500 |
| H | 0.98964400  | 0.53071400  | -1.99570900 |
| C | 2.02548800  | 2.66601100  | 1.07452500  |
| H | 0.12874500  | 2.05048600  | 1.91878600  |
| C | 2.87455800  | 2.57725800  | -0.02970300 |
| H | 3.15979800  | 1.74736400  | -2.00121500 |
| H | 2.31165200  | 3.25781000  | 1.93904400  |
| H | 3.82681800  | 3.09999500  | -0.02578200 |

**33**

|   |            |             |             |
|---|------------|-------------|-------------|
| C | 3.83328700 | 0.00509300  | 0.55571300  |
| C | 3.89331700 | -0.75141200 | -0.61770400 |
| C | 2.79265600 | -0.79850900 | -1.47625100 |
| C | 1.62578200 | -0.10870300 | -1.15455000 |
| C | 1.55877300 | 0.64533700  | 0.02454300  |
| C | 2.67507900 | 0.71122700  | 0.86915600  |
| H | 4.69052200 | 0.04788900  | 1.22130500  |
| H | 4.79841800 | -1.29888900 | -0.86542200 |
| H | 2.84299700 | -1.37281800 | -2.39669600 |

|   |             |             |             |
|---|-------------|-------------|-------------|
| H | 0.77449400  | -0.14078500 | -1.82445500 |
| H | 2.61804400  | 1.31815700  | 1.76676500  |
| C | 0.36179400  | 1.46256700  | 0.38261800  |
| O | 0.45571100  | 2.50803400  | 0.99413200  |
| N | -0.90825000 | 0.93717600  | -0.01747300 |
| C | -1.14542600 | -0.46945300 | 0.13614400  |
| C | -0.89741100 | -1.08275800 | 1.36763800  |
| C | -1.61076100 | -1.22847500 | -0.94216000 |
| C | -1.10613400 | -2.45381400 | 1.51501000  |
| H | -0.54354200 | -0.48442600 | 2.20161900  |
| C | -1.83687200 | -2.59437800 | -0.78408100 |
| H | -1.77970600 | -0.74686900 | -1.90063700 |
| C | -1.58043400 | -3.21131200 | 0.44282900  |
| H | -0.90542900 | -2.92707400 | 2.47165700  |
| H | -2.20036200 | -3.17928600 | -1.62390800 |
| H | -1.74793800 | -4.27772200 | 0.56132000  |
| C | -1.96674000 | 1.83127400  | -0.32284500 |
| O | -1.74324000 | 2.96138400  | -0.70528900 |
| C | -3.37387600 | 1.29335000  | -0.15484000 |
| H | -3.65652100 | 0.64921000  | -0.99364200 |
| H | -3.48132500 | 0.70657000  | 0.76191100  |
| H | -4.05165800 | 2.14874100  | -0.13486900 |

**34**

|   |             |             |             |
|---|-------------|-------------|-------------|
| C | -0.58154700 | -1.32819200 | 1.09632300  |
| O | -0.23647900 | -1.68431100 | 2.20543100  |
| N | 0.35093900  | -0.88733100 | 0.12704400  |
| C | 1.72791400  | -1.11391500 | 0.34947300  |
| O | 2.17408900  | -2.05694500 | 0.96170700  |
| O | 2.44486300  | -0.13530200 | -0.23494900 |
| C | 3.92100400  | -0.17055800 | -0.24562200 |
| C | 4.40910500  | -1.42802000 | -0.96412000 |
| H | 5.49579200  | -1.37383900 | -1.09140900 |
| H | 4.16963900  | -2.32945500 | -0.39838000 |
| H | 3.95503800  | -1.50076900 | -1.95872600 |
| C | 4.44471700  | -0.07133500 | 1.18646600  |
| H | 5.53583200  | 0.02557000  | 1.16940300  |
| H | 4.03199800  | 0.81420300  | 1.68219000  |
| H | 4.18069400  | -0.95594200 | 1.76769000  |
| C | 4.26937600  | 1.08417600  | -1.04352800 |
| H | 3.85923600  | 1.97669000  | -0.55997200 |
| H | 5.35644200  | 1.19434000  | -1.11149000 |
| H | 3.86340900  | 1.02430200  | -2.05893900 |
| C | -0.07783300 | -0.05832400 | -1.01444900 |

|   |             |             |             |
|---|-------------|-------------|-------------|
| H | -0.85957600 | -0.58707700 | -1.56483700 |
| H | 0.77804200  | 0.01667300  | -1.68439400 |
| C | -0.56106300 | 1.32594300  | -0.63085200 |
| C | -1.61657000 | 1.91116200  | -1.33911500 |
| C | 0.03865900  | 2.04293300  | 0.41074400  |
| C | -2.06254700 | 3.19463200  | -1.02007600 |
| H | -2.09498700 | 1.35588300  | -2.14311700 |
| C | -0.40974500 | 3.32341800  | 0.73438800  |
| H | 0.85558200  | 1.59624000  | 0.96754900  |
| C | -1.45988100 | 3.90409500  | 0.01984300  |
| H | -2.88540800 | 3.63459300  | -1.57667500 |
| H | 0.06194000  | 3.86830000  | 1.54749700  |
| H | -1.80913700 | 4.90050400  | 0.27539200  |
| C | -2.03995500 | -1.37029100 | 0.65431000  |
| C | -2.28561500 | -2.61500700 | -0.22930600 |
| C | -2.98945700 | -1.41556900 | 1.85784200  |
| H | -2.28058200 | -0.47731900 | 0.06852600  |
| C | -3.77016400 | -2.71092300 | -0.58296400 |
| H | -1.98597900 | -3.51232300 | 0.32517600  |
| H | -1.68741300 | -2.58220300 | -1.14769200 |
| C | -4.42899800 | -1.58322100 | 1.37554500  |
| H | -2.71710300 | -2.25281800 | 2.50712500  |
| H | -2.90009900 | -0.49753200 | 2.45037300  |
| H | -3.97989200 | -3.63073000 | -1.13793100 |
| H | -4.05530600 | -1.85546800 | -1.22171400 |
| H | -5.11394500 | -1.70090700 | 2.22057800  |
| H | -4.74428200 | -0.69122900 | 0.80549100  |
| O | -4.59161300 | -2.74824700 | 0.57290700  |

### 35

|   |             |             |             |
|---|-------------|-------------|-------------|
| C | -0.88324100 | -1.41583400 | 0.98798100  |
| O | -0.49240600 | -2.02616700 | 1.96357100  |
| N | 0.00570100  | -0.93710000 | -0.00190000 |
| C | 1.35656100  | -1.35580800 | 0.02846300  |
| O | 1.72635700  | -2.44274700 | 0.40822200  |
| O | 2.14074500  | -0.36689000 | -0.43946500 |
| C | 3.59462700  | -0.55810100 | -0.61399800 |
| C | 3.85606700  | -1.69497600 | -1.60125900 |
| H | 4.92514100  | -1.73210700 | -1.83718600 |
| H | 3.55718800  | -2.65931400 | -1.18792200 |
| H | 3.30875700  | -1.52336100 | -2.53489500 |
| C | 4.24534000  | -0.80091200 | 0.74701900  |
| H | 5.33417600  | -0.82983700 | 0.62991500  |
| H | 3.99879200  | 0.01222200  | 1.43854000  |

|   |             |             |             |
|---|-------------|-------------|-------------|
| H | 3.91398200  | -1.74556200 | 1.18038300  |
| C | 4.02994700  | 0.78442000  | -1.19748900 |
| H | 3.77313600  | 1.60273700  | -0.51704800 |
| H | 5.11320000  | 0.79011900  | -1.35558000 |
| H | 3.53942900  | 0.96896900  | -2.15919900 |
| C | -0.40489300 | 0.11644400  | -0.94695300 |
| H | -1.29690900 | -0.21729200 | -1.48288300 |
| H | 0.38904000  | 0.19848700  | -1.68893400 |
| C | -0.65740900 | 1.46632000  | -0.30508800 |
| C | -1.63264500 | 2.31482800  | -0.84138800 |
| C | 0.07374700  | 1.89073400  | 0.80976800  |
| C | -1.87021400 | 3.57008800  | -0.27984800 |
| H | -2.21285500 | 1.98859700  | -1.70186700 |
| C | -0.16717500 | 3.14279800  | 1.37599600  |
| H | 0.83037300  | 1.23960000  | 1.23441300  |
| C | -1.13808100 | 3.98681600  | 0.83319500  |
| H | -2.63297000 | 4.21648100  | -0.70512300 |
| H | 0.40438300  | 3.45830500  | 2.24448600  |
| H | -1.32631500 | 4.95995400  | 1.27776400  |
| C | -2.36762600 | -1.16199600 | 0.74455600  |
| C | -2.91613700 | -2.24041800 | -0.21886100 |
| C | -3.15260600 | -1.17332400 | 2.06396800  |
| H | -2.51558200 | -0.18312600 | 0.27940300  |
| C | -4.42558800 | -2.05979600 | -0.41600800 |
| H | -2.72355200 | -3.23406600 | 0.20392300  |
| H | -2.40734700 | -2.19360200 | -1.18924200 |
| C | -4.65411600 | -1.02536900 | 1.79658200  |
| H | -2.96571200 | -2.11126200 | 2.59572500  |
| H | -2.80797300 | -0.35777200 | 2.71020300  |
| H | -4.83729500 | -2.84722000 | -1.04344900 |
| H | -4.62052500 | -1.09593200 | -0.90689300 |
| H | -5.22920700 | -1.11621000 | 2.71696900  |
| H | -4.86637700 | -0.04406000 | 1.35059100  |
| N | -5.11928200 | -2.05542300 | 0.86911700  |
| C | -5.76684100 | -3.15062200 | 1.38280800  |
| O | -6.17670300 | -3.21998200 | 2.53468700  |
| O | -5.90990900 | -4.11460200 | 0.44355200  |
| C | -6.59300300 | -5.37668200 | 0.75368900  |
| C | -8.05118800 | -5.10759400 | 1.12829700  |
| H | -8.58645100 | -6.05831200 | 1.22997400  |
| H | -8.12019200 | -4.56230200 | 2.07044400  |
| H | -8.54324600 | -4.52221500 | 0.34339700  |
| C | -5.83766400 | -6.12654900 | 1.85212000  |
| H | -6.27626500 | -7.12176500 | 1.98597000  |

|   |             |             |             |
|---|-------------|-------------|-------------|
| H | -4.78591300 | -6.25319200 | 1.57175900  |
| H | -5.88711500 | -5.58983100 | 2.80026100  |
| C | -6.50625300 | -6.13223000 | -0.57204200 |
| H | -6.98646600 | -7.11193700 | -0.47960800 |
| H | -7.00868100 | -5.57442500 | -1.36948100 |
| H | -5.46135600 | -6.28523400 | -0.86224600 |

**36**

|   |             |             |             |
|---|-------------|-------------|-------------|
| C | -0.54268600 | -1.64356200 | 0.83707600  |
| O | -0.15896700 | -2.29775000 | 1.78292500  |
| N | 0.34675200  | -1.01309500 | -0.06135900 |
| C | 1.73435300  | -1.26910200 | 0.04005100  |
| O | 2.21530100  | -2.30515600 | 0.43682800  |
| O | 2.41358900  | -0.18707600 | -0.38432900 |
| C | 3.88819800  | -0.18479500 | -0.45504900 |
| C | 4.36618000  | -1.26974400 | -1.41921700 |
| H | 5.44662200  | -1.17058700 | -1.57054100 |
| H | 4.15921700  | -2.26784200 | -1.03035800 |
| H | 3.87599700  | -1.15841900 | -2.39286400 |
| C | 4.46648500  | -0.35046900 | 0.94958000  |
| H | 5.55463800  | -0.22944800 | 0.91230000  |
| H | 4.06162300  | 0.41472500  | 1.62097500  |
| H | 4.23668400  | -1.33551500 | 1.35790300  |
| C | 4.18278300  | 1.20829000  | -1.00745700 |
| H | 3.77407300  | 1.97971300  | -0.34680500 |
| H | 5.26411800  | 1.35767200  | -1.09005500 |
| H | 3.73953300  | 1.33519900  | -2.00087800 |
| C | -0.13082500 | 0.00893100  | -1.00853200 |
| H | -0.98722900 | -0.39524900 | -1.55380600 |
| H | 0.66216200  | 0.15513800  | -1.74197800 |
| C | -0.50084200 | 1.33644900  | -0.37346700 |
| C | -1.47625600 | 2.13700400  | -0.97959400 |
| C | 0.11575300  | 1.78776900  | 0.79816100  |
| C | -1.82381200 | 3.37224100  | -0.43170000 |
| H | -1.97021800 | 1.78831500  | -1.88395500 |
| C | -0.23583900 | 3.01977100  | 1.35089800  |
| H | 0.86946600  | 1.17377800  | 1.27859900  |
| C | -1.20446300 | 3.81670800  | 0.73785200  |
| H | -2.58499800 | 3.98086700  | -0.91196900 |
| H | 0.24810700  | 3.35604700  | 2.26370700  |
| H | -1.47869400 | 4.77433600  | 1.17126600  |
| C | -2.03062900 | -1.44498500 | 0.52371300  |
| H | -2.23391400 | -0.38792100 | 0.33485900  |
| H | -2.23813500 | -1.97444000 | -0.41691400 |

|   |             |             |            |
|---|-------------|-------------|------------|
| C | -2.92849400 | -1.94291100 | 1.62699300 |
| C | -3.15437300 | -3.31191500 | 1.81098100 |
| C | -3.54706400 | -1.03391200 | 2.49141000 |
| C | -3.98556900 | -3.76282700 | 2.83511400 |
| H | -2.67139400 | -4.02689700 | 1.15030400 |
| C | -4.37913800 | -1.48125500 | 3.51920100 |
| H | -3.37296600 | 0.03134400  | 2.35845500 |
| C | -4.60132700 | -2.84775900 | 3.69272000 |
| H | -4.15192400 | -4.82867700 | 2.96572300 |
| H | -4.85336500 | -0.76236600 | 4.18188600 |
| H | -5.24988900 | -3.19887600 | 4.49066200 |

**37**

|   |             |             |             |
|---|-------------|-------------|-------------|
| C | 4.86496900  | -0.18679100 | 0.43194500  |
| C | 4.84029400  | -1.25265500 | -0.47106000 |
| C | 3.65468200  | -1.58882000 | -1.12940900 |
| C | 2.48719300  | -0.87622400 | -0.87114600 |
| C | 2.50878000  | 0.19024000  | 0.03756700  |
| C | 3.70579700  | 0.54402200  | 0.67551800  |
| H | 5.78756900  | 0.07740900  | 0.93996200  |
| H | 5.74693500  | -1.81818100 | -0.66661300 |
| H | 3.64029500  | -2.40700700 | -1.84310900 |
| H | 1.57031000  | -1.12927800 | -1.39195600 |
| H | 3.71129400  | 1.38550500  | 1.36017600  |
| C | 1.32524100  | 1.04939300  | 0.27518400  |
| O | 1.39356300  | 2.24768400  | 0.47016200  |
| N | 0.03722700  | 0.44128500  | 0.19586300  |
| C | -0.34728300 | -0.86704300 | 0.57777900  |
| O | -1.12278200 | 1.99618700  | -1.55878800 |
| O | 0.39399700  | -1.70426100 | 1.04577800  |
| C | -2.51668100 | -2.21771100 | 0.47639900  |
| C | -1.79761000 | -1.03649900 | 0.31032600  |
| C | -2.43869800 | 0.10853700  | -0.15505500 |
| C | -3.78922300 | 0.13563300  | -0.47063500 |
| C | -4.50385200 | -1.05568000 | -0.30941400 |
| C | -3.87613400 | -2.21650800 | 0.15998300  |
| H | -2.01541800 | -3.10841100 | 0.83974000  |
| H | -4.27159900 | 1.03952700  | -0.82677200 |
| H | -5.56224800 | -1.07655900 | -0.54920200 |
| H | -4.45534000 | -3.12665600 | 0.27857000  |
| S | -1.32304300 | 1.49332500  | -0.20278900 |
| O | -1.62671600 | 2.40815100  | 0.89233800  |

**38**



|   |             |             |             |
|---|-------------|-------------|-------------|
| C | 4.68149600  | -0.13314700 | 0.26429000  |
| C | 4.57348700  | -1.15899100 | -0.67937100 |
| C | 3.33607700  | -1.45683800 | -1.25478100 |
| C | 2.20234300  | -0.74092100 | -0.87952700 |
| C | 2.30554100  | 0.28718500  | 0.06815200  |
| C | 3.55388000  | 0.59363200  | 0.63100200  |
| H | 5.64419600  | 0.09868400  | 0.70998300  |
| H | 5.45501000  | -1.72428800 | -0.96842400 |
| H | 3.25503600  | -2.24695100 | -1.99522600 |
| H | 1.24505200  | -0.96550700 | -1.33624900 |
| H | 3.61822300  | 1.39904800  | 1.35467000  |
| C | 1.14792700  | 1.12070900  | 0.46190100  |
| O | 1.24318300  | 2.22127300  | 0.96299600  |
| N | -0.15780000 | 0.57920700  | 0.19050800  |
| C | -0.62392300 | -0.68445200 | 0.64923900  |
| C | -1.22296800 | 1.36538100  | -0.34417500 |
| O | -1.11600100 | 2.47864700  | -0.80303000 |
| O | 0.04641700  | -1.52705500 | 1.20518300  |
| C | -3.00688800 | -1.71937200 | 0.53857700  |
| C | -2.07482300 | -0.71275100 | 0.32837500  |
| C | -2.43114600 | 0.50256400  | -0.25817100 |
| C | -3.73351200 | 0.75857900  | -0.66356000 |
| C | -4.68152600 | -0.25069600 | -0.45644600 |
| C | -4.32399100 | -1.47012500 | 0.13484700  |
| H | -2.72064200 | -2.66031200 | 0.99696500  |
| H | -4.00147300 | 1.70629400  | -1.11901000 |
| H | -5.71204400 | -0.08703700 | -0.75672700 |
| H | -5.08239700 | -2.23326400 | 0.28104600  |

**39**

|   |             |             |             |
|---|-------------|-------------|-------------|
| C | 3.70954500  | 0.43249000  | 0.28086900  |
| C | 3.80211400  | -0.67217000 | -0.57139600 |
| C | 2.64592600  | -1.25396900 | -1.09655700 |
| C | 1.39523700  | -0.74092900 | -0.76375400 |
| C | 1.29716000  | 0.36574800  | 0.09181500  |
| C | 2.46293000  | 0.95433100  | 0.60707600  |
| H | 4.60925200  | 0.88406000  | 0.68780400  |
| H | 4.77647300  | -1.07855600 | -0.82733000 |
| H | 2.71950200  | -2.10704700 | -1.76419800 |
| H | 0.49913600  | -1.18712700 | -1.18001500 |
| H | 2.36989900  | 1.81343000  | 1.26252000  |
| C | 0.00053400  | 0.97570400  | 0.44806700  |
| O | -0.13195700 | 2.06770300  | 0.95428600  |
| N | -1.18518800 | 0.19693900  | 0.13850700  |

|   |             |             |             |
|---|-------------|-------------|-------------|
| C | -1.47320400 | -1.04471800 | 0.73333000  |
| C | -2.25060800 | 0.71107500  | -0.63063300 |
| C | -2.86037700 | -1.46731600 | 0.27074100  |
| C | -3.38660100 | -0.30143400 | -0.57359000 |
| H | -2.76584300 | -2.39961000 | -0.29529400 |
| H | -4.25768800 | 0.18954900  | -0.12827600 |
| O | -2.22249300 | 1.75526000  | -1.23781700 |
| O | -0.73069200 | -1.63898300 | 1.48281700  |
| H | -3.66055400 | -0.58418300 | -1.59386400 |
| H | -3.47149900 | -1.68435100 | 1.15117600  |

**40**

|   |             |             |             |
|---|-------------|-------------|-------------|
| C | 0.27241900  | 0.01299000  | 1.11008500  |
| O | 0.21135900  | 0.02655200  | 2.31507100  |
| N | -0.98822400 | 0.00362500  | 0.33297700  |
| C | -1.53174200 | -1.25619000 | 0.04362500  |
| C | -1.53393600 | 1.25573600  | 0.01542500  |
| C | -2.86469400 | -1.26034700 | -0.67344200 |
| C | -2.86477300 | 1.24044400  | -0.70539200 |
| H | -2.65360400 | -1.33691000 | -1.75003000 |
| H | -3.38282200 | 2.16637500  | -0.44264400 |
| O | -0.92394700 | 2.27080800  | 0.29961000  |
| O | -0.91853300 | -2.26339800 | 0.34824200  |
| H | -2.65077800 | 1.28777400  | -1.78309900 |
| H | -3.38159600 | -2.17910300 | -0.38447400 |
| C | 1.51639100  | 0.00428600  | 0.31804900  |
| C | 1.50919300  | -0.01060400 | -1.08372500 |
| C | 2.73879400  | 0.01114000  | 1.00874800  |
| C | 2.71143100  | -0.01856100 | -1.78635200 |
| H | 0.56786500  | -0.01592300 | -1.62170700 |
| C | 3.93693900  | 0.00310700  | 0.30405600  |
| H | 2.72681600  | 0.02262600  | 2.09314600  |
| C | 3.92444000  | -0.01181500 | -1.09430200 |
| H | 2.70309400  | -0.03009300 | -2.87209500 |
| H | 4.88098000  | 0.00833600  | 0.84052300  |
| H | 4.86119100  | -0.01814700 | -1.64429400 |
| C | -3.69091600 | -0.00614100 | -0.38763300 |
| H | -3.99014500 | 0.00742600  | 0.66727000  |
| H | -4.60807500 | -0.01377200 | -0.98402500 |

**a**

|   |             |             |             |
|---|-------------|-------------|-------------|
| C | -1.38510200 | 0.14835400  | 0.01135500  |
| H | -1.01247100 | -0.88033800 | 0.02644500  |
| H | -1.02730800 | 0.62740200  | -0.91363200 |

|          |             |             |             |
|----------|-------------|-------------|-------------|
| H        | -2.48548700 | 0.11233000  | -0.02044600 |
| O        | -0.89231300 | 0.78301800  | 1.18178500  |
| H        | -1.21816200 | 1.69642600  | 1.17556900  |
| <b>b</b> |             |             |             |
| C        | -1.36600300 | 0.10801500  | 0.02317200  |
| H        | -0.96445000 | -0.91881200 | 0.05302100  |
| H        | -2.46567200 | 0.02625000  | 0.00321100  |
| O        | -0.93119900 | 0.85855100  | 1.15471000  |
| H        | -1.24913200 | 0.40213400  | 1.94924100  |
| C        | -0.87992500 | 0.81396700  | -1.23326000 |
| H        | -1.27814300 | 1.83746600  | -1.23676500 |
| H        | 0.21373300  | 0.90188300  | -1.18464400 |
| C        | -1.28973000 | 0.08829200  | -2.51844700 |
| H        | -0.89616900 | -0.93779100 | -2.49949300 |
| H        | -2.38449500 | -0.00360700 | -2.55285800 |
| C        | -0.79839500 | 0.79891200  | -3.78108900 |
| H        | 0.29588700  | 0.87715400  | -3.79033200 |
| H        | -1.10220000 | 0.26149800  | -4.68712300 |
| H        | -1.20285300 | 1.81674800  | -3.84520800 |
| <b>c</b> |             |             |             |
| C        | -1.14038800 | 0.03631500  | 0.00291400  |
| O        | -1.62873900 | 1.01548500  | 0.91885300  |
| H        | -1.81797300 | 0.56231800  | 1.75555700  |
| H        | -0.29552400 | -0.52047400 | 0.44074600  |
| H        | -1.92348600 | -0.70050000 | -0.24372200 |
| C        | -0.69644100 | 0.73116400  | -1.25468500 |
| C        | -0.72683000 | -0.02082700 | -2.56247600 |
| C        | -1.71459000 | 1.08999900  | -2.30631500 |
| H        | 0.12370200  | 1.43134900  | -1.11043600 |
| H        | -1.09503000 | -1.04410700 | -2.55261700 |
| H        | 0.07762900  | 0.15372700  | -3.27150600 |
| H        | -1.59078100 | 2.02602200  | -2.84368900 |
| H        | -2.74979600 | 0.81844200  | -2.11490600 |
| <b>d</b> |             |             |             |
| O        | -0.94562200 | 1.07780100  | 0.91896300  |
| H        | -1.49724300 | 1.00603000  | 1.71385000  |
| C        | -1.31310200 | 0.00787500  | 0.04722900  |
| H        | -1.29843500 | -0.95217500 | 0.59171300  |
| H        | -2.33102200 | 0.14172000  | -0.35196700 |
| C        | -0.32413000 | -0.04891400 | -1.07736100 |
| H        | 0.72188900  | -0.08933000 | -0.77403500 |

|   |             |             |             |
|---|-------------|-------------|-------------|
| C | -0.65369800 | -0.07305200 | -2.36807300 |
| H | 0.09768600  | -0.14773400 | -3.15020900 |
| H | -1.69121800 | -0.02353500 | -2.69413800 |

**e**

|   |             |            |             |
|---|-------------|------------|-------------|
| O | -0.91158300 | 0.78654000 | 1.14779000  |
| H | -0.72615000 | 0.08887200 | 1.79489400  |
| C | 0.33437200  | 1.20431300 | 0.60243400  |
| H | 1.05823000  | 1.41239100 | 1.40848600  |
| H | 0.77800900  | 0.41575700 | -0.02622100 |
| C | 0.13938200  | 2.45377500 | -0.22344300 |
| C | 1.06619600  | 2.78143400 | -1.22005200 |
| C | -0.93422100 | 3.31733700 | 0.01617600  |
| C | 0.92950700  | 3.95634300 | -1.95911300 |
| H | 1.89875600  | 2.11020500 | -1.42014600 |
| C | -1.07676600 | 4.48946100 | -0.72857500 |
| H | -1.65772500 | 3.05771600 | 0.78111000  |
| C | -0.14504600 | 4.81484800 | -1.71576700 |
| H | 1.65616400  | 4.19686400 | -2.73054400 |
| H | -1.91861000 | 5.14957800 | -0.53670100 |
| H | -0.25712800 | 5.72741500 | -2.29480600 |

**f**

|   |             |            |             |
|---|-------------|------------|-------------|
| O | -0.89909600 | 0.94044200 | 1.28799400  |
| H | -0.74709800 | 0.13177700 | 1.80380400  |
| C | 0.31580900  | 1.21828200 | 0.59501000  |
| H | 1.15276900  | 1.36399000 | 1.29706400  |
| H | 0.59707100  | 0.38537200 | -0.06963000 |
| C | 0.15208800  | 2.43003900 | -0.20624400 |
| C | 0.03459200  | 3.42783100 | -0.87504300 |
| H | -0.07311100 | 4.31185500 | -1.46429000 |

**g**

|   |             |            |             |
|---|-------------|------------|-------------|
| O | -0.31795200 | 1.19929400 | 1.71036900  |
| H | 0.01077200  | 0.43109900 | 2.20187400  |
| C | 0.42842800  | 1.28232000 | 0.50491100  |
| H | 1.51258900  | 1.22287600 | 0.70052800  |
| H | 0.18490000  | 0.45880600 | -0.18674100 |
| C | 0.09964700  | 2.58624800 | -0.14101900 |
| C | -0.54301100 | 3.70781900 | 0.28735000  |
| C | -0.51329300 | 4.63262200 | -0.81328300 |
| H | -0.98449800 | 3.85275400 | 1.26202900  |
| C | 0.14636600  | 4.00323300 | -1.82195600 |
| H | -0.93100400 | 5.62963600 | -0.84106200 |

|   |            |            |             |
|---|------------|------------|-------------|
| H | 0.41755700 | 4.28031400 | -2.82956100 |
| O | 0.52657200 | 2.74907200 | -1.42873500 |

**h**

|   |             |             |             |
|---|-------------|-------------|-------------|
| O | -0.97473600 | 0.62162500  | 0.90070400  |
| H | -0.88399500 | -0.03778400 | 1.60654500  |
| C | 0.31301000  | 1.20261700  | 0.69485800  |
| H | 0.76234700  | 1.47882100  | 1.66356400  |
| H | 1.00068600  | 0.48815500  | 0.21550400  |
| C | 0.17441100  | 2.42854700  | -0.17062000 |
| C | 1.07317700  | 2.68817300  | -1.20428600 |
| C | -0.84849600 | 3.35928700  | 0.06957300  |
| C | 0.98026900  | 3.84645400  | -1.98248700 |
| H | 1.86675200  | 1.97540900  | -1.41661500 |
| C | -0.96182800 | 4.50977600  | -0.69776900 |
| H | -1.56683300 | 3.16414800  | 0.85969800  |
| C | -0.04427700 | 4.76411000  | -1.72953300 |
| H | 1.69620100  | 4.01293500  | -2.77855200 |
| H | -1.75446900 | 5.22998300  | -0.51953500 |
| O | -0.23764300 | 5.92070300  | -2.42489400 |
| C | 0.66170100  | 6.21779500  | -3.48270200 |
| H | 0.62655300  | 5.45311200  | -4.26981400 |
| H | 0.33379000  | 7.17358000  | -3.89677400 |
| H | 1.69355000  | 6.31703800  | -3.12056600 |

**i**

|   |             |             |             |
|---|-------------|-------------|-------------|
| C | -1.40164700 | 0.12361600  | -0.01809900 |
| H | -1.03952000 | -0.91826600 | -0.03750600 |
| O | -0.86746800 | 0.79512300  | 1.12848400  |
| H | -1.23572000 | 0.36164300  | 1.91507900  |
| C | -0.85364500 | 0.85272700  | -1.23674200 |
| H | -1.17711100 | 0.36060200  | -2.16045600 |
| H | -1.20900200 | 1.88976100  | -1.25156000 |
| H | 0.24115000  | 0.86607100  | -1.21518700 |
| C | -2.92888400 | 0.11214400  | 0.01483600  |
| H | -3.34023800 | -0.39914900 | -0.86362800 |
| H | -3.29956600 | -0.41080200 | 0.90635000  |
| H | -3.31644200 | 1.13742700  | 0.03445500  |

**j**

|   |             |             |             |
|---|-------------|-------------|-------------|
| O | -1.83248800 | 0.04831500  | -0.06328400 |
| C | -0.53706100 | 0.01008600  | 0.47132500  |
| C | 0.49301900  | -0.99972800 | -0.07731100 |

|   |             |             |             |
|---|-------------|-------------|-------------|
| C | 0.50495700  | 1.06498600  | 0.04299700  |
| H | -0.65854400 | -0.05238300 | 1.55522700  |
| H | 0.20904100  | -1.40960200 | -1.05982400 |
| H | 0.81310800  | -1.81985400 | 0.57583200  |
| H | 0.22715900  | 1.58975200  | -0.88510500 |
| H | 0.83387400  | 1.79987400  | 0.78684500  |
| O | 1.49528800  | 0.03673300  | -0.18766500 |
| H | -1.75540100 | 0.10384900  | -1.03084900 |

**k**

|   |             |             |             |
|---|-------------|-------------|-------------|
| O | 0.03916400  | 1.66986100  | 2.17665300  |
| H | 0.33202700  | 0.91690200  | 2.71423300  |
| C | 0.37238100  | 1.36854900  | 0.82257700  |
| H | -0.31644300 | 0.60373800  | 0.42979600  |
| C | 0.19519300  | 2.63170700  | -0.00520000 |
| C | 0.26541900  | 2.55086500  | -1.40153000 |
| C | -0.01551500 | 3.87556500  | 0.59474000  |
| C | 0.12791700  | 3.69386500  | -2.18595800 |
| H | 0.43733900  | 1.58725300  | -1.87500200 |
| C | -0.15303300 | 5.02235500  | -0.19191200 |
| H | -0.07762500 | 3.93793400  | 1.67475700  |
| C | -0.08159700 | 4.93683500  | -1.58200200 |
| H | 0.18439800  | 3.61559900  | -3.26834800 |
| H | -0.31818500 | 5.98421000  | 0.28648900  |
| H | -0.18945400 | 5.82943300  | -2.19209600 |
| C | 1.78826200  | 0.82381000  | 0.71005800  |
| C | 2.04431700  | -0.37197800 | 0.03428600  |
| C | 2.85534600  | 1.52488900  | 1.28764600  |
| C | 3.34889900  | -0.86073200 | -0.07422900 |
| H | 1.21845000  | -0.92554900 | -0.40649300 |
| C | 4.15567700  | 1.03611100  | 1.18635200  |
| H | 2.65628700  | 2.45395600  | 1.81369300  |
| C | 4.40656800  | -0.15774900 | 0.50217700  |
| H | 3.53540900  | -1.79165000 | -0.60272700 |
| H | 4.97677400  | 1.58697800  | 1.63707000  |
| H | 5.42168500  | -0.53652600 | 0.42172600  |

**l**

|   |             |             |             |
|---|-------------|-------------|-------------|
| O | -1.10918900 | 0.82594500  | 1.21576400  |
| H | -0.53603000 | 1.56773800  | 0.96252500  |
| C | -1.48164100 | 0.14831500  | 0.01454200  |
| C | -0.25836500 | -0.27643600 | -0.80433200 |
| C | -2.31804600 | -1.06387200 | 0.41684500  |
| H | -2.10714000 | 0.81099300  | -0.60997900 |

|   |             |             |             |
|---|-------------|-------------|-------------|
| C | -0.66556300 | -1.09289600 | -2.03916900 |
| H | 0.39411600  | -0.87693000 | -0.15543100 |
| H | 0.31478700  | 0.61252600  | -1.10442600 |
| C | -2.73439300 | -1.88511500 | -0.81115800 |
| H | -1.71583200 | -1.68394200 | 1.09524800  |
| H | -3.19584300 | -0.72844100 | 0.98188000  |
| C | -1.51483700 | -2.30789600 | -1.64188000 |
| H | 0.22704900  | -1.41199500 | -2.59097900 |
| H | -1.24526900 | -0.45468700 | -2.72182200 |
| H | -3.30553900 | -2.76626100 | -0.49446000 |
| H | -3.40773500 | -1.28432900 | -1.43970500 |
| H | -1.83616500 | -2.85527100 | -2.53685500 |
| H | -0.89818100 | -3.00033200 | -1.05083800 |

**m**

|   |             |             |             |
|---|-------------|-------------|-------------|
| C | -1.39839500 | 0.10147400  | -0.02122400 |
| O | -0.89137400 | 0.81591000  | 1.12072600  |
| H | -1.21576300 | 0.35411100  | 1.91143800  |
| C | -0.86275700 | 0.86021800  | -1.23466800 |
| H | -1.19281100 | 0.38757400  | -2.16588300 |
| H | -1.21909600 | 1.89596800  | -1.22533800 |
| H | 0.23242200  | 0.87576400  | -1.22219500 |
| C | -2.93156800 | 0.12002300  | 0.00041300  |
| H | -3.35109700 | -0.37900100 | -0.88088900 |
| H | -3.31400900 | -0.39876000 | 0.88945500  |
| H | -3.29917400 | 1.15152300  | 0.02330800  |
| C | -0.87078300 | -1.33834900 | -0.00202900 |
| H | -1.20395200 | -1.89973300 | -0.88275700 |
| H | 0.22435100  | -1.34238500 | 0.01811800  |
| H | -1.23041400 | -1.87231700 | 0.88755100  |

**PhCOOMe**

|   |           |           |           |
|---|-----------|-----------|-----------|
| C | 0.229319  | 0.121209  | -0.000422 |
| C | 0.749508  | -1.180352 | 0.001036  |
| C | 1.099283  | 1.219745  | -0.001639 |
| C | 2.129254  | -1.376427 | 0.001571  |
| H | 0.074308  | -2.028165 | 0.002058  |
| C | -1.233804 | 0.391837  | 0.000360  |
| C | 2.477010  | 1.019610  | -0.001525 |
| H | 0.677727  | 2.219145  | -0.002580 |
| C | 2.993542  | -0.278895 | 0.000246  |
| H | 2.530832  | -2.385626 | 0.002958  |
| O | -1.968565 | -0.740001 | -0.003102 |
| O | -1.728682 | 1.504257  | 0.003672  |

|   |           |           |           |
|---|-----------|-----------|-----------|
| H | 3.148374  | 1.873394  | -0.002770 |
| H | 4.068703  | -0.435196 | 0.000451  |
| C | -3.391706 | -0.550414 | -0.000504 |
| H | -3.820409 | -1.553389 | -0.009116 |
| H | -3.708752 | 0.007101  | -0.886180 |
| H | -3.707235 | -0.009188 | 0.895871  |

**PhMe**

|   |           |           |           |
|---|-----------|-----------|-----------|
| C | -0.913743 | 0.003409  | -0.010143 |
| C | -2.422926 | 0.001478  | 0.007858  |
| C | -0.192841 | 1.203998  | -0.007566 |
| H | -2.831472 | -0.773210 | -0.651084 |
| H | -2.807870 | -0.198196 | 1.017027  |
| H | -2.829043 | 0.966728  | -0.312079 |
| C | -0.197005 | -1.201642 | -0.007688 |
| C | 1.203426  | 1.204139  | 0.001820  |
| H | -0.732108 | 2.148415  | -0.014264 |
| C | 1.197685  | -1.207262 | 0.001877  |
| H | -0.740241 | -2.144067 | -0.014380 |
| C | 1.904342  | -0.002398 | 0.007144  |
| H | 1.742689  | 2.147793  | 0.001536  |
| H | 1.733569  | -2.152875 | 0.001705  |
| H | 2.990854  | -0.004919 | 0.011725  |

**Morpholine**

|   |           |           |           |
|---|-----------|-----------|-----------|
| O | -0.000032 | -1.394306 | -0.275714 |
| C | 1.176421  | -0.747461 | 0.199981  |
| C | -1.176459 | -0.747407 | 0.199974  |
| C | 1.206028  | 0.722217  | -0.221553 |
| H | 2.024018  | -1.302695 | -0.216575 |
| H | 1.225005  | -0.819836 | 1.301967  |
| C | -1.205991 | 0.722275  | -0.221547 |
| H | -2.024075 | -1.302595 | -0.216603 |
| H | -1.225072 | -0.819800 | 1.301959  |
| N | 0.000038  | 1.453096  | 0.189598  |
| H | 2.088403  | 1.222130  | 0.195371  |
| H | 1.275551  | 0.777392  | -1.315993 |
| H | -2.088330 | 1.222230  | 0.195398  |
| H | -1.275532 | 0.777471  | -1.315986 |
| H | 0.000042  | 1.530735  | 1.207854  |

**MeOH**

|   |           |           |           |
|---|-----------|-----------|-----------|
| C | -0.662541 | -0.019276 | 0.000000  |
| O | 0.749980  | 0.122959  | -0.000002 |



|   |           |           |           |
|---|-----------|-----------|-----------|
| H | -1.035953 | -0.545528 | -0.892602 |
| H | 1.131385  | -0.768701 | 0.000029  |
| H | -1.084002 | 0.990541  | -0.000686 |
| H | -1.036025 | -0.544329 | 0.893276  |

Ester product of rxn between 22 and a

|   |             |             |             |
|---|-------------|-------------|-------------|
| C | 2.73928200  | 0.83683800  | 0.57102700  |
| C | 3.15132700  | -0.38767700 | 0.03842500  |
| C | 2.22563200  | -1.22710300 | -0.58617500 |
| C | 0.88840800  | -0.84636000 | -0.68022000 |
| C | 0.47294900  | 0.38133200  | -0.14646300 |
| C | 1.40420400  | 1.22085400  | 0.47927700  |
| H | 3.45868700  | 1.48992700  | 1.05641500  |
| H | 4.19315900  | -0.68749900 | 0.11005800  |
| H | 2.54625600  | -2.17876200 | -1.00006300 |
| H | 0.16557400  | -1.49313600 | -1.16385800 |
| H | 1.06320100  | 2.16688200  | 0.88581900  |
| C | -0.94081200 | 0.84003200  | -0.21713900 |
| O | -1.34554600 | 1.89735800  | 0.23062600  |
| O | -1.74218000 | -0.05055400 | -0.83829300 |
| C | -3.12289300 | 0.32952300  | -0.94041000 |
| H | -3.22700900 | 1.25717800  | -1.51005900 |
| H | -3.61486500 | -0.49313800 | -1.46100800 |
| H | -3.55988100 | 0.46733600  | 0.05254500  |

Ester product of rxn between 22 and b

|   |             |             |             |
|---|-------------|-------------|-------------|
| C | 2.64839600  | 0.42901800  | 1.04516500  |
| C | 3.18503200  | -0.49052200 | 0.13996100  |
| C | 2.38771000  | -1.01638300 | -0.87956100 |
| C | 1.05505200  | -0.62620400 | -0.99705400 |
| C | 0.51476400  | 0.29594200  | -0.09023400 |
| C | 1.31752600  | 0.82161100  | 0.93077100  |
| H | 3.26769500  | 0.83846800  | 1.83797200  |
| H | 4.22360900  | -0.79696400 | 0.22894000  |
| H | 2.80483300  | -1.73102900 | -1.58322800 |
| H | 0.43139500  | -1.03061100 | -1.78588700 |
| H | 0.88132300  | 1.53448900  | 1.62219900  |
| C | -0.90139000 | 0.74918200  | -0.16820700 |
| O | -1.40806900 | 1.55228000  | 0.59472600  |
| O | -1.57147200 | 0.17048500  | -1.18379300 |
| C | -2.95550400 | 0.55651500  | -1.33393600 |
| C | -3.52235100 | -0.20717600 | -2.51714400 |
| H | -3.48975100 | 0.32553100  | -0.40626100 |
| C | -4.99529900 | 0.13619300  | -2.76589600 |

|   |             |             |             |
|---|-------------|-------------|-------------|
| H | -2.92893800 | 0.02369700  | -3.41150500 |
| H | -3.41559900 | -1.28431100 | -2.33360500 |
| C | -5.58315600 | -0.62639700 | -3.95455300 |
| H | -5.09331100 | 1.21691200  | -2.93799900 |
| H | -5.57887400 | -0.08582700 | -1.86182000 |
| H | -5.03788200 | -0.39973500 | -4.87914000 |
| H | -5.52977900 | -1.71048700 | -3.79519100 |
| H | -3.00542700 | 1.63991300  | -1.48642600 |
| H | -6.63523800 | -0.36402100 | -4.11462500 |

Ester product of rxn between 22 and c

|   |             |             |             |
|---|-------------|-------------|-------------|
| C | 2.44611800  | 0.11070900  | 1.20226800  |
| C | 2.95809700  | -0.79637500 | 0.27060800  |
| C | 2.21989400  | -1.12011900 | -0.87046700 |
| C | 0.97106400  | -0.53951500 | -1.08358100 |
| C | 0.45578900  | 0.37053000  | -0.15039600 |
| C | 1.19863300  | 0.69256900  | 0.99311000  |
| H | 3.01949700  | 0.36266400  | 2.08970200  |
| H | 3.93146900  | -1.25074200 | 0.43376700  |
| H | 2.61774400  | -1.82556400 | -1.59428900 |
| H | 0.39263600  | -0.78689000 | -1.96619100 |
| H | 0.78233400  | 1.39843000  | 1.70377000  |
| C | -0.87302600 | 1.01920500  | -0.32568300 |
| O | -1.36248700 | 1.80549800  | 0.46613200  |
| O | -1.48470100 | 0.63841200  | -1.46322400 |
| C | -2.78705900 | 1.22219300  | -1.70986500 |
| H | -3.44557300 | 0.98356600  | -0.86809100 |
| H | -2.67802000 | 2.31092600  | -1.75184200 |
| C | -3.31070900 | 0.65551400  | -2.99520800 |
| C | -3.95732600 | -0.70703400 | -2.99360000 |
| C | -4.80486100 | 0.52607700  | -3.17048100 |
| H | -2.73513200 | 0.92501100  | -3.87786900 |
| H | -4.01414700 | -1.23454100 | -2.04479200 |
| H | -3.79446100 | -1.34998900 | -3.85375700 |
| H | -5.22028800 | 0.73383200  | -4.15228100 |
| H | -5.44181900 | 0.83161900  | -2.34408800 |

Ester product of rxn between 22 and d

|   |            |             |             |
|---|------------|-------------|-------------|
| C | 2.57538900 | 0.28562000  | 1.12186600  |
| C | 3.19189800 | -0.35603200 | 0.04429300  |
| C | 2.45118500 | -0.68088500 | -1.09483100 |
| C | 1.09518900 | -0.36653500 | -1.16047400 |
| C | 0.47505800 | 0.27698800  | -0.08068200 |
| C | 1.22093700 | 0.60174700  | 1.06021100  |

|   |             |             |             |
|---|-------------|-------------|-------------|
| H | 3.15089200  | 0.53867300  | 2.00756300  |
| H | 4.24898000  | -0.60247800 | 0.09215200  |
| H | 2.93081700  | -1.17934100 | -1.93223300 |
| H | 0.51488100  | -0.61506600 | -2.04148300 |
| H | 0.72281200  | 1.10002500  | 1.88490100  |
| C | -0.96877700 | 0.63727100  | -0.09565200 |
| O | -1.54703400 | 1.20088400  | 0.81599100  |
| O | -1.57868900 | 0.27100500  | -1.24175200 |
| C | -2.99034400 | 0.58391000  | -1.33035600 |
| H | -3.11983800 | 1.67069100  | -1.33864700 |
| H | -3.48533700 | 0.19203100  | -0.43445100 |
| C | -3.51723300 | -0.05077300 | -2.57651700 |
| H | -3.36489100 | -1.12595000 | -2.66312400 |
| C | -4.16752900 | 0.61931100  | -3.52682200 |
| H | -4.32703500 | 1.69388700  | -3.46087900 |
| H | -4.57244500 | 0.11976500  | -4.40304700 |

Ester product of rxn between 22 and e

|   |             |             |             |
|---|-------------|-------------|-------------|
| C | 2.76197900  | 0.48156600  | 0.83967200  |
| C | 3.21242500  | -0.32324100 | -0.21026300 |
| C | 2.31309400  | -0.78758700 | -1.17334100 |
| C | 0.96367400  | -0.44981300 | -1.09090800 |
| C | 0.51030200  | 0.35743900  | -0.03835300 |
| C | 1.41463400  | 0.82135800  | 0.92608800  |
| H | 3.46101500  | 0.84285700  | 1.58831900  |
| H | 4.26390500  | -0.58833200 | -0.27799500 |
| H | 2.66388300  | -1.41290000 | -1.98923600 |
| H | 0.26024500  | -0.80564100 | -1.83485300 |
| H | 1.04356300  | 1.44444400  | 1.73272300  |
| C | -0.91881100 | 0.74774700  | 0.10038100  |
| O | -1.36219100 | 1.43610500  | 1.00173200  |
| O | -1.68277700 | 0.25036100  | -0.89427400 |
| C | -3.09499500 | 0.55580800  | -0.82139300 |
| H | -3.44915900 | 0.30552200  | 0.18395000  |
| H | -3.23671300 | 1.63082500  | -0.96632700 |
| C | -3.79915000 | -0.24470200 | -1.88113600 |
| C | -3.66567500 | -1.63924100 | -1.91747100 |
| C | -4.61108800 | 0.38655700  | -2.82727500 |
| C | -4.33218500 | -2.38663500 | -2.88605200 |
| H | -3.03059200 | -2.13397600 | -1.18764100 |
| C | -5.28798100 | -0.36168000 | -3.79318800 |
| H | -4.71381400 | 1.46866000  | -2.80827600 |
| C | -5.14803200 | -1.74901100 | -3.82543400 |
| H | -4.21922500 | -3.46705200 | -2.90764100 |

|   |             |             |             |
|---|-------------|-------------|-------------|
| H | -5.91744800 | 0.14076800  | -4.52233200 |
| H | -5.66983500 | -2.33256800 | -4.57879300 |

Ester product of rxn between 22 and f

|   |             |             |             |
|---|-------------|-------------|-------------|
| C | 2.58901100  | 0.20344900  | 1.19259700  |
| C | 3.18919300  | -0.48431100 | 0.13436000  |
| C | 2.46028600  | -0.76274100 | -1.02451000 |
| C | 1.13183900  | -0.35596200 | -1.12983600 |
| C | 0.52850300  | 0.33393200  | -0.06905100 |
| C | 1.26213300  | 0.61207600  | 1.09221000  |
| H | 3.15571300  | 0.42009700  | 2.09340200  |
| H | 4.22480800  | -0.80321600 | 0.21279500  |
| H | 2.92750400  | -1.29719800 | -1.84644900 |
| H | 0.56086500  | -0.56948600 | -2.02599600 |
| H | 0.77704800  | 1.14677200  | 1.90170100  |
| C | -0.88423000 | 0.79121700  | -0.12381400 |
| O | -1.45550100 | 1.39215400  | 0.76730900  |
| O | -1.48599000 | 0.46454400  | -1.29063300 |
| C | -2.86444900 | 0.88257100  | -1.39834500 |
| H | -3.44155000 | 0.44198400  | -0.57805800 |
| H | -2.92195000 | 1.97122000  | -1.29059800 |
| C | -3.37367900 | 0.45199300  | -2.69293600 |
| C | -3.82338500 | 0.10777300  | -3.75811700 |
| H | -4.21759500 | -0.19973900 | -4.70197600 |

Ester product of rxn between 22 and g

|   |             |             |             |
|---|-------------|-------------|-------------|
| C | 2.60907700  | 0.35355800  | 1.15539800  |
| C | 3.29945800  | -0.03285300 | 0.00338500  |
| C | 2.60698100  | -0.24237600 | -1.19174500 |
| C | 1.22539800  | -0.06715500 | -1.23961300 |
| C | 0.53146500  | 0.32052300  | -0.08504500 |
| C | 1.22884200  | 0.53029200  | 1.11206200  |
| H | 3.14722600  | 0.51669400  | 2.08462000  |
| H | 4.37664800  | -0.17059600 | 0.03700000  |
| H | 3.14415700  | -0.54205100 | -2.08693700 |
| H | 0.68181300  | -0.22788000 | -2.16345600 |
| H | 0.67352900  | 0.83029700  | 1.99422300  |
| C | -0.94243700 | 0.52322200  | -0.07796800 |
| O | -1.58723400 | 0.86818700  | 0.89613700  |
| O | -1.50038500 | 0.27891300  | -1.28191000 |
| C | -2.93736500 | 0.47589900  | -1.35160300 |
| H | -3.42685600 | -0.18787100 | -0.63479000 |
| H | -3.15934100 | 1.50935800  | -1.06981500 |
| C | -3.39017100 | 0.17004000  | -2.72534800 |

|   |             |             |             |
|---|-------------|-------------|-------------|
| C | -4.04421800 | -0.89364800 | -3.27645800 |
| C | -4.19769800 | -0.60201300 | -4.67165100 |
| H | -4.37511400 | -1.77869000 | -2.75063200 |
| C | -3.62305700 | 0.61788800  | -4.86457500 |
| H | -4.67260900 | -1.21725900 | -5.42296500 |
| H | -3.49118800 | 1.25130400  | -5.72919400 |
| O | -3.12911600 | 1.10378500  | -3.69303900 |

Ester product of rxn between 22 and h

|   |             |             |             |
|---|-------------|-------------|-------------|
| C | 2.50323500  | -0.21220000 | 1.13301800  |
| C | 2.83263300  | -1.18590500 | 0.18615600  |
| C | 1.98041500  | -1.43016000 | -0.89362200 |
| C | 0.79902700  | -0.70385400 | -1.03056400 |
| C | 0.46727200  | 0.27329600  | -0.08185500 |
| C | 1.32392200  | 0.51585900  | 0.99994700  |
| H | 3.16564000  | -0.02201800 | 1.97252200  |
| H | 3.75303600  | -1.75390900 | 0.28969500  |
| H | 2.23689000  | -2.18698800 | -1.62928000 |
| H | 0.13290500  | -0.88709700 | -1.86581000 |
| H | 1.04915400  | 1.27663800  | 1.72268000  |
| C | -0.77939100 | 1.08104300  | -0.18198800 |
| O | -1.10210800 | 1.94996300  | 0.60862700  |
| O | -1.52156900 | 0.74418400  | -1.25507100 |
| C | -2.74118500 | 1.50918800  | -1.44647100 |
| H | -3.40483000 | 1.33472300  | -0.59478500 |
| H | -2.47615000 | 2.57103400  | -1.45295100 |
| C | -3.36655100 | 1.07167500  | -2.73684600 |
| C | -4.57515600 | 0.37650400  | -2.75376200 |
| C | -2.74114700 | 1.35200200  | -3.96271300 |
| C | -5.16682800 | -0.03065300 | -3.95299100 |
| H | -5.07305300 | 0.14525000  | -1.81539500 |
| C | -3.30815300 | 0.94877900  | -5.16183700 |
| H | -1.79625800 | 1.88919600  | -3.97102800 |
| C | -4.52996900 | 0.25497200  | -5.16535700 |
| H | -6.10870500 | -0.56549000 | -3.92813700 |
| H | -2.82996500 | 1.16245600  | -6.11253600 |
| O | -5.00875100 | -0.09174000 | -6.39081300 |
| C | -6.24567300 | -0.78909000 | -6.45077500 |
| H | -6.44112600 | -0.96215000 | -7.51093500 |
| H | -6.18994000 | -1.75465400 | -5.93162400 |
| H | -7.06435300 | -0.19466400 | -6.02489100 |

Ester product of rxn between 22 and i

|   |            |            |            |
|---|------------|------------|------------|
| C | 2.63710400 | 0.20123400 | 1.22875900 |
|---|------------|------------|------------|

|   |             |             |             |
|---|-------------|-------------|-------------|
| C | 3.24541200  | -0.44924400 | 0.15188800  |
| C | 2.51036400  | -0.72800300 | -1.00291800 |
| C | 1.16907400  | -0.35850600 | -1.08452600 |
| C | 0.55651900  | 0.29435900  | -0.00608300 |
| C | 1.29736100  | 0.57208300  | 1.15041700  |
| H | 3.20761300  | 0.41863000  | 2.12714600  |
| H | 4.29095200  | -0.73853300 | 0.21256700  |
| H | 2.98288400  | -1.23368600 | -1.84013600 |
| H | 0.59327000  | -0.57226900 | -1.97736600 |
| H | 0.80625900  | 1.07811400  | 1.97454800  |
| C | -0.87467000 | 0.71538600  | -0.03572800 |
| O | -1.42443500 | 1.28847300  | 0.88924100  |
| O | -1.46871600 | 0.38615600  | -1.19653100 |
| C | -2.87428500 | 0.71725200  | -1.42739300 |
| C | -3.09344500 | 2.22526800  | -1.46306800 |
| H | -4.10350700 | 2.43414000  | -1.83397700 |
| H | -2.98646700 | 2.66695300  | -0.47054100 |
| H | -2.37742700 | 2.70079500  | -2.14208000 |
| C | -3.79133800 | -0.02429900 | -0.46157900 |
| H | -3.54669200 | -1.09188200 | -0.44384200 |
| H | -3.70975100 | 0.37400300  | 0.55138500  |
| H | -4.82911700 | 0.08035800  | -0.79848800 |
| H | -3.02280500 | 0.31492200  | -2.43384300 |

Ester product of rxn between 22 and j

|   |             |             |             |
|---|-------------|-------------|-------------|
| C | 2.40636500  | -0.19615100 | 1.31263800  |
| C | 3.21478200  | -0.38142400 | 0.18777500  |
| C | 2.67354300  | -0.25447900 | -1.09392600 |
| C | 1.32539500  | 0.05796400  | -1.25556400 |
| C | 0.51303900  | 0.24459100  | -0.12833000 |
| C | 1.05887400  | 0.11573700  | 1.15613300  |
| H | 2.82725200  | -0.29553500 | 2.30884400  |
| H | 4.26648100  | -0.62494400 | 0.31007100  |
| H | 3.30246700  | -0.39921200 | -1.96743100 |
| H | 0.89964700  | 0.15785600  | -2.24725900 |
| H | 0.41354600  | 0.26303900  | 2.01538300  |
| C | -0.92946500 | 0.57871800  | -0.23956400 |
| O | -1.67900500 | 0.74718000  | 0.70528300  |
| O | -1.34472800 | 0.67895200  | -1.52455800 |
| C | -2.72451200 | 1.01714900  | -1.68649200 |
| C | -3.20768600 | 0.83317900  | -3.12627300 |
| C | -3.74998200 | -0.06953200 | -1.34160000 |
| H | -2.91832800 | 1.99150600  | -1.23499000 |
| H | -2.47414500 | 0.32847700  | -3.76825600 |

|   |             |             |             |
|---|-------------|-------------|-------------|
| H | -3.59295400 | 1.72395900  | -3.63514300 |
| H | -3.29834200 | -1.03483900 | -1.08133500 |
| H | -4.51206100 | 0.19430900  | -0.60144100 |
| O | -4.26705100 | -0.05341300 | -2.69622000 |

Ester product of rxn between 22 and k

|   |             |             |             |
|---|-------------|-------------|-------------|
| C | 2.48931100  | 0.18183100  | 1.30301000  |
| C | 2.99100400  | -0.72546900 | 0.36585500  |
| C | 2.21092600  | -1.10586600 | -0.72893600 |
| C | 0.93022100  | -0.58121100 | -0.89125900 |
| C | 0.42569900  | 0.32941100  | 0.04776900  |
| C | 1.21015600  | 0.70801100  | 1.14542600  |
| H | 3.09554700  | 0.47750400  | 2.15429500  |
| H | 3.98938900  | -1.13598000 | 0.48884700  |
| H | 2.60064400  | -1.81234400 | -1.45606200 |
| H | 0.31847000  | -0.87392500 | -1.73670700 |
| H | 0.80156300  | 1.41334000  | 1.86101100  |
| C | -0.93218800 | 0.92347800  | -0.07662400 |
| O | -1.42039500 | 1.70047500  | 0.72150600  |
| O | -1.56994500 | 0.49384300  | -1.19098500 |
| C | -2.88564700 | 1.04680500  | -1.44888300 |
| H | -3.35853200 | 1.23654100  | -0.48264100 |
| C | -2.77422800 | 2.35498600  | -2.21034900 |
| C | -3.91672800 | 3.15394900  | -2.33910600 |
| C | -1.58149400 | 2.76765900  | -2.80858400 |
| C | -3.86643600 | 4.34941800  | -3.05238400 |
| H | -4.84844600 | 2.83376300  | -1.87932400 |
| C | -1.53083300 | 3.96695200  | -3.52381200 |
| H | -0.69111000 | 2.15597000  | -2.71069200 |
| C | -2.67075600 | 4.76022500  | -3.64833200 |
| H | -4.75898000 | 4.96260800  | -3.14111500 |
| H | -0.59632300 | 4.27925600  | -3.98188100 |
| H | -2.62998600 | 5.69331700  | -4.20322900 |
| C | -3.66045300 | -0.02010100 | -2.19339100 |
| C | -4.64743300 | -0.75376700 | -1.52954500 |
| C | -3.38667700 | -0.29894400 | -3.53783200 |
| C | -5.35545200 | -1.75460900 | -2.19772300 |
| H | -4.86077200 | -0.54085700 | -0.48500600 |
| C | -4.08671900 | -1.30266900 | -4.20429300 |
| H | -2.63125800 | 0.27955600  | -4.06134400 |
| C | -5.07455000 | -2.03158000 | -3.53585000 |
| H | -6.12390700 | -2.31567000 | -1.67326300 |
| H | -3.86742600 | -1.51293300 | -5.24743300 |
| H | -5.62435500 | -2.80963000 | -4.05816900 |

## Ester product of rxn between 22 and l

|   |             |             |             |
|---|-------------|-------------|-------------|
| C | 2.58102700  | 0.24402500  | 1.20207500  |
| C | 3.21049100  | -0.44507400 | 0.16195200  |
| C | 2.49943700  | -0.76511800 | -0.99725300 |
| C | 1.16039100  | -0.39909400 | -1.11978200 |
| C | 0.52718100  | 0.29255200  | -0.07808900 |
| C | 1.24378300  | 0.61271600  | 1.08257700  |
| H | 3.13328500  | 0.49328300  | 2.10356600  |
| H | 4.25434400  | -0.73198800 | 0.25448600  |
| H | 2.98904900  | -1.30005900 | -1.80594800 |
| H | 0.60251800  | -0.64412100 | -2.01607100 |
| H | 0.73606800  | 1.14879500  | 1.87714600  |
| C | -0.90006700 | 0.71154800  | -0.15572200 |
| O | -1.47696300 | 1.32889700  | 0.72257100  |
| O | -1.48334500 | 0.32616900  | -1.30719900 |
| C | -2.87678700 | 0.68914600  | -1.49530800 |
| C | -2.98539400 | 2.14550000  | -1.98177600 |
| C | -3.46740300 | -0.28403900 | -2.50513400 |
| H | -3.37304000 | 0.57475400  | -0.52793900 |
| C | -4.24158100 | 2.36562900  | -2.85455200 |
| H | -2.08200700 | 2.37938000  | -2.55713100 |
| H | -2.99423500 | 2.80971900  | -1.11217200 |
| C | -4.99045200 | -0.04906300 | -2.63777800 |
| H | -2.96900400 | -0.13100700 | -3.47066800 |
| H | -3.25806000 | -1.31424500 | -2.19851400 |
| C | -5.37853900 | 1.43272400  | -2.42134100 |
| H | -4.00367700 | 2.16990500  | -3.90840400 |
| H | -4.55484100 | 3.41401400  | -2.79707100 |
| H | -5.52599300 | -0.67599600 | -1.91512500 |
| H | -5.31150900 | -0.37761500 | -3.63309800 |
| H | -5.59608000 | 1.61042000  | -1.35958400 |
| H | -6.29989200 | 1.66379200  | -2.96803400 |

## Ester product of rxn between 22 and m

|   |            |             |             |
|---|------------|-------------|-------------|
| C | 2.60810700 | 0.18126000  | 1.19903300  |
| C | 3.20639200 | -0.45619800 | 0.10887600  |
| C | 2.46239000 | -0.71479800 | -1.04491100 |
| C | 1.12225600 | -0.33825700 | -1.11210100 |
| C | 0.51981300 | 0.30183800  | -0.02042000 |
| C | 1.26960800 | 0.55950900  | 1.13486700  |
| H | 3.18539800 | 0.38286100  | 2.09678700  |
| H | 4.25096000 | -0.75107400 | 0.15844300  |
| H | 2.92710000 | -1.21029500 | -1.89255300 |



|   |             |             |             |
|---|-------------|-------------|-------------|
| H | 0.53898000  | -0.53620000 | -2.00370700 |
| H | 0.78642900  | 1.05595100  | 1.96944700  |
| C | -0.91040900 | 0.73027300  | -0.03545200 |
| O | -1.44661300 | 1.29834300  | 0.90087800  |
| O | -1.51030000 | 0.41181900  | -1.19472000 |
| C | -2.92423400 | 0.73719700  | -1.45252100 |
| C | -3.12033600 | 2.25351500  | -1.42645600 |
| H | -4.13893100 | 2.49491700  | -1.74987300 |
| H | -2.96716300 | 2.65568400  | -0.42401900 |
| H | -2.42039800 | 2.74034900  | -2.11442200 |
| C | -3.14107400 | 0.18558700  | -2.86059600 |
| H | -4.17146600 | 0.37021000  | -3.18151400 |
| H | -2.46471900 | 0.66806100  | -3.57401500 |
| H | -2.95855800 | -0.89388900 | -2.88665200 |
| C | -3.81812500 | 0.01543500  | -0.44330900 |
| H | -3.59454600 | -1.05705500 | -0.43508700 |
| H | -3.68132700 | 0.41181900  | 0.56369000  |
| H | -4.86784100 | 0.14173300  | -0.73093400 |

Ester product of rxn between 34 and a

|   |             |             |             |
|---|-------------|-------------|-------------|
| C | -1.03108000 | 0.59762200  | 0.05743500  |
| O | -1.61700400 | 1.16958900  | 0.95376400  |
| O | -1.62338600 | 0.23149300  | -1.09928400 |
| C | -3.01076800 | 0.58526100  | -1.22351700 |
| H | -3.14027500 | 1.66923600  | -1.15956200 |
| H | -3.31960000 | 0.22343400  | -2.20516400 |
| H | -3.60327600 | 0.10689400  | -0.43867000 |
| C | 0.43843000  | 0.22773000  | 0.05482500  |
| C | 1.22155300  | 1.14548500  | -0.91119800 |
| C | 1.05356100  | 0.31275500  | 1.45618600  |
| H | 0.51887400  | -0.80060000 | -0.32320900 |
| C | 2.71448000  | 0.82809700  | -0.83026400 |
| H | 1.06149500  | 2.19282200  | -0.62582500 |
| H | 0.86456700  | 1.01729000  | -1.93869600 |
| C | 2.55745100  | 0.05131500  | 1.38568300  |
| H | 0.87445100  | 1.31107800  | 1.86906900  |
| H | 0.58079500  | -0.40922800 | 2.13235600  |
| H | 3.29530600  | 1.52761100  | -1.43937600 |
| H | 2.89987400  | -0.19130200 | -1.21260000 |
| H | 3.02654300  | 0.19835700  | 2.36315400  |
| H | 2.74577500  | -0.99101300 | 1.07267300  |
| O | 3.21295100  | 0.94659300  | 0.49470000  |

Ester product of rxn between 34 and b

|   |             |             |             |
|---|-------------|-------------|-------------|
| C | -0.95440100 | 0.62874300  | -0.07853700 |
| O | -1.47968500 | 1.35946700  | 0.73849500  |
| O | -1.59683300 | 0.12369100  | -1.14877500 |
| C | -2.98434100 | 0.50726100  | -1.29814600 |
| C | -3.52296800 | -0.17855300 | -2.54073000 |
| H | -3.53198400 | 0.20878000  | -0.39803800 |
| C | -4.99529700 | 0.16563000  | -2.79218900 |
| H | -2.91699900 | 0.11835400  | -3.40672400 |
| H | -3.40718800 | -1.26464000 | -2.42970100 |
| C | -5.55428300 | -0.52259500 | -4.03878400 |
| H | -5.10270500 | 1.25433100  | -2.89412700 |
| H | -5.59175000 | -0.12168500 | -1.91530300 |
| H | -4.99551500 | -0.23060900 | -4.93659500 |
| H | -5.49226800 | -1.61427400 | -3.94995100 |
| H | -3.04213400 | 1.59819800  | -1.37646600 |
| H | -6.60615000 | -0.26022200 | -4.20020500 |
| C | 0.49594600  | 0.19390200  | -0.03685700 |
| C | 1.41496100  | 1.39293000  | -0.35403200 |
| C | 0.86310200  | -0.36942400 | 1.34758900  |
| H | 0.64766500  | -0.57915700 | -0.79858600 |
| C | 2.87882300  | 0.99134900  | -0.17910500 |
| H | 1.17868200  | 2.21471100  | 0.33152400  |
| H | 1.24617900  | 1.74852200  | -1.37800400 |
| C | 2.36170400  | -0.65817100 | 1.41722000  |
| H | 0.59450100  | 0.36629400  | 2.11323000  |
| H | 0.29932000  | -1.28769800 | 1.55419100  |
| H | 3.53859400  | 1.85360300  | -0.31640200 |
| H | 3.15222000  | 0.23083800  | -0.93181200 |
| H | 2.65150800  | -0.97567800 | 2.42355000  |
| H | 2.62199600  | -1.47133000 | 0.71670700  |
| O | 3.14054800  | 0.49557400  | 1.12689600  |

Ester product of rxn between 34 and c

|   |             |             |             |
|---|-------------|-------------|-------------|
| C | -0.90251800 | 0.97750600  | -0.30927600 |
| O | -1.40107800 | 1.73968600  | 0.49637200  |
| O | -1.49213100 | 0.62663500  | -1.46692300 |
| C | -2.78752800 | 1.22671800  | -1.72673300 |
| H | -3.45433700 | 1.00240700  | -0.88786900 |
| H | -2.66282400 | 2.31377200  | -1.77356100 |
| C | -3.31156800 | 0.66097700  | -3.01230300 |
| C | -3.98693100 | -0.68739900 | -3.00613500 |
| C | -4.80668100 | 0.56191200  | -3.19990300 |
| H | -2.72316700 | 0.91103000  | -3.89220900 |
| H | -4.06388100 | -1.20616400 | -2.05385800 |

|   |             |             |             |
|---|-------------|-------------|-------------|
| H | -3.83030400 | -1.34065500 | -3.85964900 |
| H | -5.20914300 | 0.77049100  | -4.18691900 |
| H | -5.44422600 | 0.88732000  | -2.38158200 |
| C | 0.45437400  | 0.32369600  | -0.14750800 |
| C | 1.56971100  | 1.38264300  | -0.27650900 |
| C | 0.57159600  | -0.36685200 | 1.22314700  |
| H | 0.57738000  | -0.41950300 | -0.94343900 |
| C | 2.92861300  | 0.75145300  | 0.02328800  |
| H | 1.37849800  | 2.19131700  | 0.43807400  |
| H | 1.57505800  | 1.81692600  | -1.28388900 |
| C | 1.99332200  | -0.88625800 | 1.43069700  |
| H | 0.32632300  | 0.35707400  | 2.00762700  |
| H | -0.14079200 | -1.19772700 | 1.30012800  |
| H | 3.71900000  | 1.50839200  | 0.02085400  |
| H | 3.17344300  | 0.00176700  | -0.74980500 |
| H | 2.11447200  | -1.30054600 | 2.43630200  |
| H | 2.21082200  | -1.68930700 | 0.70440300  |
| O | 2.96135900  | 0.14826800  | 1.30986300  |

Ester product of rxn between 34 and d

|   |             |             |             |
|---|-------------|-------------|-------------|
| C | -1.08064600 | 0.18557300  | 0.01910700  |
| O | -1.76691700 | 0.37712200  | 1.00280400  |
| O | -1.56854800 | 0.17907000  | -1.23877000 |
| C | -2.99120300 | 0.43399400  | -1.36345500 |
| H | -3.20578900 | 1.45592500  | -1.03525600 |
| H | -3.52120400 | -0.25330900 | -0.69415800 |
| C | -3.36913600 | 0.21527800  | -2.79250500 |
| H | -3.12322400 | -0.76281700 | -3.20429800 |
| C | -3.99890200 | 1.12339900  | -3.53670000 |
| H | -4.25087700 | 2.10731400  | -3.14551500 |
| H | -4.29414900 | 0.91661300  | -4.56205400 |
| C | 0.41886600  | -0.02766400 | 0.02397300  |
| C | 1.13915500  | 1.32617400  | -0.17243900 |
| C | 0.89875200  | -0.67688400 | 1.32902400  |
| H | 0.67177700  | -0.67195400 | -0.82717400 |
| C | 2.65048900  | 1.13070600  | -0.05530400 |
| H | 0.80570000  | 2.02828200  | 0.60150400  |
| H | 0.89003100  | 1.75575700  | -1.14954000 |
| C | 2.42505000  | -0.74148200 | 1.35293300  |
| H | 0.54218900  | -0.08363100 | 2.17740200  |
| H | 0.48259300  | -1.68604200 | 1.43576800  |
| H | 3.17202300  | 2.09160100  | -0.10294600 |
| H | 3.01245400  | 0.50523600  | -0.89027800 |
| H | 2.78530300  | -1.11781100 | 2.31512900  |

|   |            |             |            |
|---|------------|-------------|------------|
| H | 2.78719400 | -1.42498200 | 0.56460400 |
| O | 3.01515900 | 0.54192900  | 1.18523500 |

Ester product of rxn between 34 and e

|   |             |             |             |
|---|-------------|-------------|-------------|
| C | -0.91794700 | 1.20224100  | -0.12549500 |
| O | -1.36754100 | 2.04727900  | 0.62206500  |
| O | -1.68588700 | 0.42492900  | -0.91681600 |
| C | -3.11812500 | 0.64920200  | -0.82117700 |
| H | -3.42722400 | 0.51458800  | 0.21877700  |
| H | -3.32220900 | 1.68680500  | -1.10230300 |
| C | -3.79872400 | -0.32585400 | -1.73808600 |
| C | -4.39463300 | -1.48463000 | -1.22977000 |
| C | -3.82737200 | -0.09451600 | -3.11915700 |
| C | -5.01369300 | -2.39755000 | -2.08518500 |
| H | -4.37444500 | -1.67025900 | -0.15874800 |
| C | -4.44084500 | -1.00614000 | -3.97683000 |
| H | -3.36489700 | 0.80414400  | -3.51974700 |
| C | -5.03684900 | -2.15962400 | -3.46016000 |
| H | -5.47710600 | -3.29201400 | -1.67841800 |
| H | -4.45874900 | -0.81618100 | -5.04638800 |
| H | -5.51932700 | -2.86832800 | -4.12750600 |
| C | 0.54899700  | 0.85633200  | -0.29059300 |
| C | 1.45987800  | 1.86098900  | 0.42338400  |
| C | 0.83716700  | -0.56954800 | 0.22909700  |
| H | 0.76385800  | 0.86628400  | -1.36852900 |
| C | 2.91695800  | 1.41226100  | 0.31949900  |
| H | 1.17182300  | 1.92520800  | 1.47816700  |
| H | 1.34544900  | 2.86289600  | -0.00633600 |
| C | 2.33458700  | -0.86068500 | 0.13623500  |
| H | 0.52169200  | -0.64496200 | 1.27751700  |
| H | 0.27270800  | -1.31030900 | -0.34674700 |
| H | 3.57083700  | 2.06822200  | 0.90205000  |
| H | 3.24993000  | 1.44995900  | -0.73294700 |
| H | 2.57188700  | -1.83039700 | 0.58458800  |
| H | 2.64299300  | -0.89129600 | -0.92375900 |
| O | 3.10938200  | 0.10146300  | 0.83822600  |

Ester product of rxn between 34 and f

|   |             |            |             |
|---|-------------|------------|-------------|
| C | -0.91295100 | 0.73801900 | -0.10937200 |
| O | -1.48627400 | 1.30594900 | 0.79814600  |
| O | -1.50272200 | 0.44695900 | -1.28984500 |
| C | -2.88419000 | 0.86800100 | -1.39688000 |
| H | -3.47031300 | 0.38255500 | -0.60894400 |
| H | -2.94560100 | 1.94889900 | -1.23065900 |

|   |             |             |             |
|---|-------------|-------------|-------------|
| C | -3.37431000 | 0.50721200  | -2.71939200 |
| C | -3.80753000 | 0.22118200  | -3.80841200 |
| H | -4.18704800 | -0.03386800 | -4.77370400 |
| C | 0.52846500  | 0.27981600  | -0.07431300 |
| C | 1.47122200  | 1.49589700  | 0.03854800  |
| C | 0.76834200  | -0.65895700 | 1.12414600  |
| H | 0.74503700  | -0.25631600 | -1.00486200 |
| C | 2.91292700  | 1.02367000  | 0.22052700  |
| H | 1.17325600  | 2.09952200  | 0.90320900  |
| H | 1.39668700  | 2.12709800  | -0.85552300 |
| C | 2.25498400  | -0.99331900 | 1.23732700  |
| H | 0.43389800  | -0.15955200 | 2.03998900  |
| H | 0.18750500  | -1.58294600 | 1.01339900  |
| H | 3.58140800  | 1.87338300  | 0.38936200  |
| H | 3.25443900  | 0.49799000  | -0.68848600 |
| H | 2.45282300  | -1.58807100 | 2.13424600  |
| H | 2.57602300  | -1.58323600 | 0.36078800  |
| O | 3.05513400  | 0.17594700  | 1.35232000  |

Ester product of rxn between 34 and g

|   |             |             |             |
|---|-------------|-------------|-------------|
| C | -0.52889600 | -0.63959400 | -0.59094500 |
| O | -0.64659300 | -1.48092000 | -1.46010700 |
| O | 0.66173200  | -0.22644600 | -0.11240900 |
| C | 1.82695100  | -0.85120500 | -0.72087000 |
| H | 1.79034500  | -1.92855300 | -0.54207100 |
| H | 1.78626900  | -0.68086500 | -1.80048900 |
| C | 3.04590100  | -0.27234200 | -0.11741200 |
| C | 3.94051800  | -0.73372000 | 0.80444800  |
| C | 4.91600000  | 0.30146900  | 0.98275000  |
| H | 3.90717400  | -1.69561600 | 1.29733000  |
| C | 4.53990100  | 1.31667400  | 0.15609900  |
| H | 5.77738400  | 0.28686600  | 1.63572100  |
| H | 4.94949600  | 2.29218600  | -0.06005700 |
| O | 3.40747000  | 0.98530900  | -0.52263200 |
| C | -1.68337600 | 0.06478500  | 0.09000300  |
| C | -2.54712800 | 0.81208200  | -0.94497000 |
| C | -2.56404200 | -0.95428900 | 0.84119300  |
| H | -1.27433900 | 0.78486700  | 0.80736200  |
| C | -3.78780000 | 1.39368600  | -0.26897300 |
| H | -2.85214200 | 0.10954600  | -1.72826800 |
| H | -1.97182300 | 1.61640400  | -1.41983900 |
| C | -3.80334900 | -0.26036000 | 1.40438300  |
| H | -2.87153800 | -1.74158600 | 0.14402200  |
| H | -2.00041800 | -1.42635100 | 1.65543500  |

|   |             |             |             |
|---|-------------|-------------|-------------|
| H | -4.45421000 | 1.85229800  | -1.00589700 |
| H | -3.49132900 | 2.17433200  | 0.45353700  |
| H | -4.48051200 | -0.98606800 | 1.86522700  |
| H | -3.50700300 | 0.46807200  | 2.17960300  |
| O | -4.55345200 | 0.39253900  | 0.38889400  |

Ester product of rxn between 34 and h

|   |             |             |             |
|---|-------------|-------------|-------------|
| C | -0.74591000 | 1.17370600  | -0.29916000 |
| O | -0.97404000 | 2.13794500  | 0.40358400  |
| O | -1.55795600 | 0.76855000  | -1.29618700 |
| C | -2.73118000 | 1.59345600  | -1.53836600 |
| H | -3.39951500 | 1.51525100  | -0.67590200 |
| H | -2.40329500 | 2.63431700  | -1.61579100 |
| C | -3.38791900 | 1.11149200  | -2.79662100 |
| C | -4.60326600 | 0.42848200  | -2.76361700 |
| C | -2.78046900 | 1.33088600  | -4.04369800 |
| C | -5.21791500 | -0.02582900 | -3.93392200 |
| H | -5.08849600 | 0.24483100  | -1.80815800 |
| C | -3.37081500 | 0.88154700  | -5.21482300 |
| H | -1.83132100 | 1.85869800  | -4.09108300 |
| C | -4.59843500 | 0.19992400  | -5.16791600 |
| H | -6.16471800 | -0.54891800 | -3.87070800 |
| H | -2.90700100 | 1.04919500  | -6.18174400 |
| O | -5.10079900 | -0.19525500 | -6.36888600 |
| C | -6.34499200 | -0.88192000 | -6.37763400 |
| H | -6.55994200 | -1.09963500 | -7.42570200 |
| H | -6.28943900 | -1.82405800 | -5.81715500 |
| H | -7.15079500 | -0.26106000 | -5.96509900 |
| C | 0.47704700  | 0.28160500  | -0.20737300 |
| C | 1.35926600  | 0.43816600  | -1.46613100 |
| C | 1.30893300  | 0.57093200  | 1.04681800  |
| H | 0.11941100  | -0.75734700 | -0.18001200 |
| C | 2.63091400  | -0.39615800 | -1.31435200 |
| H | 1.63482800  | 1.49357900  | -1.58747200 |
| H | 0.80944400  | 0.12825100  | -2.36098800 |
| C | 2.58300400  | -0.27213400 | 1.03508700  |
| H | 1.57380600  | 1.63347500  | 1.06868600  |
| H | 0.73015900  | 0.36142100  | 1.95387900  |
| H | 3.31198300  | -0.22621500 | -2.15398000 |
| H | 2.37164000  | -1.46959100 | -1.29816800 |
| H | 3.23222900  | -0.01197400 | 1.87655800  |
| H | 2.32839000  | -1.34336700 | 1.12203300  |
| O | 3.35487300  | -0.05539000 | -0.14042500 |

## Ester product of rxn between 34 and i

|   |             |             |             |
|---|-------------|-------------|-------------|
| C | -0.90839600 | 0.64444800  | -0.01649800 |
| O | -1.47249900 | 1.14088700  | 0.94024500  |
| O | -1.47287700 | 0.41440900  | -1.21479200 |
| C | -2.87269700 | 0.77462600  | -1.45214300 |
| C | -3.08540300 | 2.28108700  | -1.35883300 |
| H | -4.08416500 | 2.52902500  | -1.73611700 |
| H | -3.00304900 | 2.63138200  | -0.32824200 |
| H | -2.34990600 | 2.81125100  | -1.97380300 |
| C | -3.81533600 | -0.04382200 | -0.57745200 |
| H | -3.57503500 | -1.11028800 | -0.64852600 |
| H | -3.75603100 | 0.26278400  | 0.46853800  |
| H | -4.84485800 | 0.09531100  | -0.92695900 |
| H | -2.99773700 | 0.46350600  | -2.49353000 |
| C | 0.54801900  | 0.21954900  | -0.00526300 |
| C | 1.45921800  | 1.46179900  | 0.07957800  |
| C | 0.83791600  | -0.70136600 | 1.19378700  |
| H | 0.76243600  | -0.31499100 | -0.93732500 |
| C | 2.91721400  | 1.03282000  | 0.23803700  |
| H | 1.16087000  | 2.06460400  | 0.94486400  |
| H | 1.34899700  | 2.08288000  | -0.81804500 |
| C | 2.33460900  | -0.99350900 | 1.28374300  |
| H | 0.50433100  | -0.20461600 | 2.11116300  |
| H | 0.28150500  | -1.64255100 | 1.10189200  |
| H | 3.56525300  | 1.90193000  | 0.38780000  |
| H | 3.25637800  | 0.50928700  | -0.67330500 |
| H | 2.56613400  | -1.57365000 | 2.18233100  |
| H | 2.65708300  | -1.58276300 | 0.40708300  |
| O | 3.10474200  | 0.19838300  | 1.37336300  |

## Ester product of rxn between 34 and j

|   |             |             |             |
|---|-------------|-------------|-------------|
| C | -1.01806800 | 0.26726300  | -0.15777000 |
| O | -1.82493200 | 0.14632200  | 0.74129100  |
| O | -1.35924100 | 0.69702900  | -1.39626200 |
| C | -2.73941200 | 1.03995800  | -1.55862800 |
| C | -3.12565400 | 1.23778200  | -3.02568100 |
| C | -3.74194000 | -0.11991400 | -1.58681600 |
| H | -2.99715600 | 1.85365900  | -0.87867600 |
| H | -2.33358300 | 0.94208900  | -3.72565200 |
| H | -3.51618000 | 2.22298600  | -3.30452800 |
| H | -3.27120300 | -1.11052500 | -1.55706200 |
| H | -4.55957400 | -0.07738300 | -0.86007900 |
| O | -4.17146800 | 0.24293000  | -2.92307500 |
| C | 0.46852400  | 0.00501100  | -0.06113700 |

|   |            |             |             |
|---|------------|-------------|-------------|
| C | 1.23767700 | 1.34357300  | 0.03124300  |
| C | 0.81947700 | -0.87565100 | 1.14415300  |
| H | 0.77671600 | -0.49460000 | -0.98914900 |
| C | 2.72805200 | 1.06956900  | 0.23164900  |
| H | 0.86019900 | 1.92049500  | 0.88465800  |
| H | 1.08321800 | 1.93948400  | -0.87492800 |
| C | 2.33675700 | -1.00317000 | 1.27461800  |
| H | 0.41004500 | -0.42331900 | 2.05344800  |
| H | 0.36890800 | -1.86999600 | 1.04194500  |
| H | 3.27740500 | 2.00273600  | 0.38944300  |
| H | 3.14054000 | 0.57883400  | -0.66751500 |
| H | 2.60579700 | -1.55154500 | 2.18229700  |
| H | 2.74570600 | -1.55617300 | 0.41060000  |
| O | 2.97077800 | 0.26620800  | 1.37731000  |

Ester product of rxn between 34 and k

|   |             |             |             |
|---|-------------|-------------|-------------|
| C | -0.92440800 | 0.93906800  | -0.09968700 |
| O | -1.41810100 | 1.70399600  | 0.70250000  |
| O | -1.54842200 | 0.51585800  | -1.22375600 |
| C | -2.87735100 | 1.05100400  | -1.47293100 |
| H | -3.34847300 | 1.22400700  | -0.50278300 |
| C | -2.78794900 | 2.36890400  | -2.21906200 |
| C | -3.92652900 | 3.18067900  | -2.28590900 |
| C | -1.62006600 | 2.77752200  | -2.86761500 |
| C | -3.89681900 | 4.38401300  | -2.98728200 |
| H | -4.83891400 | 2.86524500  | -1.78584100 |
| C | -1.58954400 | 3.98443800  | -3.57067600 |
| H | -0.73349700 | 2.15423800  | -2.81924300 |
| C | -2.72593400 | 4.79023500  | -3.63319900 |
| H | -4.78591700 | 5.00724000  | -3.02702000 |
| H | -0.67436400 | 4.29297500  | -4.06866700 |
| H | -2.70116900 | 5.72957000  | -4.17837400 |
| C | -3.64150800 | -0.01981300 | -2.22262800 |
| C | -4.59784800 | -0.78688100 | -1.55094800 |
| C | -3.39163700 | -0.27011400 | -3.57720600 |
| C | -5.29805700 | -1.79204700 | -2.22061100 |
| H | -4.79421100 | -0.59529300 | -0.49890300 |
| C | -4.08442800 | -1.27755300 | -4.24582200 |
| H | -2.66059100 | 0.33277500  | -4.10748900 |
| C | -5.04097800 | -2.03974300 | -3.56931700 |
| H | -6.04267000 | -2.37855900 | -1.68962700 |
| H | -3.88348900 | -1.46490300 | -5.29699100 |
| H | -5.58517000 | -2.82055700 | -4.09336900 |
| C | 0.44367300  | 0.30663700  | 0.03749500  |



|   |             |             |             |
|---|-------------|-------------|-------------|
| C | 1.50701100  | 1.36009800  | 0.39258600  |
| C | 0.41303700  | -0.77625800 | 1.13800600  |
| H | 0.70091100  | -0.16907600 | -0.91558500 |
| C | 2.84523800  | 0.67887400  | 0.67408400  |
| H | 1.18024400  | 1.91122300  | 1.28070900  |
| H | 1.62298000  | 2.08350500  | -0.42413800 |
| C | 1.82108500  | -1.32241700 | 1.37007900  |
| H | 0.03767000  | -0.33141600 | 2.06671000  |
| H | -0.26274000 | -1.59293400 | 0.85638200  |
| H | 3.58929700  | 1.40579400  | 1.01354400  |
| H | 3.22835200  | 0.20537800  | -0.24715100 |
| H | 1.83195000  | -2.02789800 | 2.20656200  |
| H | 2.16912100  | -1.85750300 | 0.46903400  |
| O | 2.74076300  | -0.29276600 | 1.70725700  |

Ester product of rxn between 34 and 1

|   |             |             |             |
|---|-------------|-------------|-------------|
| C | -0.86129100 | 1.26154300  | -0.12321500 |
| O | -1.41139500 | 2.14014900  | 0.51092200  |
| O | -1.45196800 | 0.56438100  | -1.11439200 |
| C | -2.84148600 | 0.87394000  | -1.40630000 |
| C | -2.93160100 | 2.10612800  | -2.32392700 |
| C | -3.45489800 | -0.35622400 | -2.05923600 |
| H | -3.33431100 | 1.07740500  | -0.45159200 |
| C | -4.19318700 | 2.06539100  | -3.21586400 |
| H | -2.03087100 | 2.13089200  | -2.94852700 |
| H | -2.92017900 | 3.00936500  | -1.70601500 |
| C | -4.97518000 | -0.14947700 | -2.25499600 |
| H | -2.96183200 | -0.52235800 | -3.02531200 |
| H | -3.25845900 | -1.24194100 | -1.44578700 |
| C | -5.33938900 | 1.33236100  | -2.50893700 |
| H | -3.96809200 | 1.54782100  | -4.15753500 |
| H | -4.49080600 | 3.08473400  | -3.48585600 |
| H | -5.51534200 | -0.51155700 | -1.37228300 |
| H | -5.30838100 | -0.76547600 | -3.09828700 |
| H | -5.54448800 | 1.83497000  | -1.55415700 |
| H | -6.26228900 | 1.39732100  | -3.09641900 |
| C | 0.55728400  | 0.77462900  | 0.10234800  |
| C | 1.34132500  | 1.69807700  | 1.04106000  |
| C | 0.55343100  | -0.66236900 | 0.66963300  |
| H | 1.04998500  | 0.74326300  | -0.87950700 |
| C | 2.72024000  | 1.10574400  | 1.32812800  |
| H | 0.78924800  | 1.81199800  | 1.98006600  |
| H | 1.44748800  | 2.69746500  | 0.60323300  |
| C | 1.98371000  | -1.10175900 | 0.98102500  |

|   |             |             |             |
|---|-------------|-------------|-------------|
| H | -0.03806100 | -0.68577300 | 1.59373700  |
| H | 0.09269700  | -1.35488100 | -0.04259700 |
| H | 3.25828300  | 1.70606300  | 2.06797400  |
| H | 3.32366200  | 1.08695200  | 0.40314700  |
| H | 1.99341100  | -2.08076100 | 1.47017800  |
| H | 2.56103400  | -1.18463700 | 0.04302600  |
| O | 2.63409900  | -0.20642200 | 1.87184900  |

Ester product of rxn between 34 and m

|   |             |             |             |
|---|-------------|-------------|-------------|
| C | -0.93729900 | 0.67445900  | -0.02329800 |
| O | -1.47624100 | 1.20358500  | 0.93092600  |
| O | -1.52209900 | 0.40740200  | -1.20256500 |
| C | -2.93424000 | 0.75076900  | -1.46201300 |
| C | -3.12653200 | 2.26467100  | -1.36627200 |
| H | -4.14053300 | 2.52516400  | -1.68929400 |
| H | -2.98364800 | 2.61876700  | -0.34433500 |
| H | -2.41770400 | 2.78139600  | -2.02287100 |
| C | -3.13693000 | 0.26710000  | -2.89676500 |
| H | -4.16365700 | 0.46870400  | -3.21949300 |
| H | -2.45209400 | 0.78109100  | -3.57939700 |
| H | -2.95530500 | -0.81017700 | -2.97232300 |
| C | -3.84090100 | -0.01487600 | -0.49761200 |
| H | -3.62187800 | -1.08765400 | -0.53925200 |
| H | -3.71260200 | 0.33173000  | 0.52878500  |
| H | -4.88752000 | 0.12927300  | -0.78812400 |
| C | 0.51669700  | 0.23851200  | -0.02444800 |
| C | 1.43948800  | 1.47009300  | 0.07739100  |
| C | 0.80096700  | -0.70369500 | 1.15999500  |
| H | 0.72297200  | -0.28546100 | -0.96422600 |
| C | 2.89378900  | 1.02578600  | 0.22603700  |
| H | 1.14793900  | 2.06236200  | 0.95207800  |
| H | 1.33351800  | 2.10611200  | -0.81032700 |
| C | 2.29514300  | -1.01111200 | 1.24142800  |
| H | 0.47496000  | -0.21771000 | 2.08590700  |
| H | 0.23542300  | -1.63806900 | 1.05490600  |
| H | 3.54994300  | 1.88657600  | 0.38798400  |
| H | 3.22675200  | 0.51335700  | -0.69386400 |
| H | 2.52353800  | -1.60767800 | 2.13001600  |
| H | 2.60978300  | -1.58924200 | 0.35455400  |
| O | 3.07632000  | 0.17208400  | 1.34788200  |

Ester product of rxn between 35 and a

|   |             |            |            |
|---|-------------|------------|------------|
| C | -0.30438200 | 1.30101300 | 0.01837300 |
| O | -0.14242300 | 2.46040500 | 0.34055700 |

|   |             |             |             |
|---|-------------|-------------|-------------|
| O | -1.35769200 | 0.87416700  | -0.70968600 |
| C | -2.28592800 | 1.89437100  | -1.11406000 |
| H | -1.78965800 | 2.64309700  | -1.73779100 |
| H | -3.05965200 | 1.37825600  | -1.68405300 |
| H | -2.72197600 | 2.38744600  | -0.24086300 |
| C | 0.63882900  | 0.15686700  | 0.33196300  |
| C | 1.45356200  | -0.20778800 | -0.93286400 |
| C | 1.57036600  | 0.49981700  | 1.50287300  |
| H | 0.02519700  | -0.71517700 | 0.59485800  |
| C | 2.48017600  | -1.30260700 | -0.61883900 |
| H | 1.98513100  | 0.68254700  | -1.29235400 |
| H | 0.78049900  | -0.53914700 | -1.73067000 |
| C | 2.58630600  | -0.62365700 | 1.73218500  |
| H | 2.10351400  | 1.43120500  | 1.28292900  |
| H | 0.98658100  | 0.66892800  | 2.41513800  |
| H | 3.12044400  | -1.49776400 | -1.47823700 |
| H | 1.96665600  | -2.23429000 | -0.34729300 |
| H | 3.28854800  | -0.36561200 | 2.52170100  |
| H | 2.06838400  | -1.54604100 | 2.02803000  |
| N | 3.32748700  | -0.90789800 | 0.50309500  |
| C | 4.55375600  | -0.35879100 | 0.22172000  |
| O | 5.07781400  | -0.39717500 | -0.88487700 |
| O | 5.10197300  | 0.19540700  | 1.32709600  |
| C | 6.42269700  | 0.83541700  | 1.27554200  |
| C | 7.49111700  | -0.19421800 | 0.90514700  |
| H | 7.35581700  | -0.54968700 | -0.11718800 |
| H | 8.48507200  | 0.25858000  | 0.99385400  |
| H | 7.44553000  | -1.05097700 | 1.58679400  |
| C | 6.61177900  | 1.31839000  | 2.71306700  |
| H | 7.57604400  | 1.82691200  | 2.81532600  |
| H | 5.81889600  | 2.02034400  | 2.99238700  |
| H | 6.58905600  | 0.47525300  | 3.41165100  |
| C | 6.39373800  | 2.02038000  | 0.30877300  |
| H | 6.25432700  | 1.68574200  | -0.71989300 |
| H | 5.57944200  | 2.70476400  | 0.57231100  |
| H | 7.33757000  | 2.57280800  | 0.37645600  |

Ester product of rxn between 35 and b

|   |             |             |             |
|---|-------------|-------------|-------------|
| C | -0.49459700 | 0.14843600  | 0.17633800  |
| O | -0.64042900 | 1.07642600  | 0.94650400  |
| O | -1.34809500 | -0.12560600 | -0.83003900 |
| C | -2.46942300 | 0.77476600  | -0.98274900 |
| C | -3.28420100 | 0.29811000  | -2.17148500 |
| H | -3.05613900 | 0.76886100  | -0.05793600 |

|   |             |             |             |
|---|-------------|-------------|-------------|
| C | -4.50526300 | 1.18923700  | -2.42556400 |
| H | -2.64232700 | 0.28118900  | -3.06205200 |
| H | -3.60717600 | -0.73598100 | -1.99346700 |
| C | -5.33494400 | 0.71955700  | -3.62176200 |
| H | -4.17372100 | 2.22344200  | -2.59193500 |
| H | -5.13595900 | 1.20908100  | -1.52601400 |
| H | -4.73841700 | 0.72179200  | -4.54241800 |
| H | -5.70636200 | -0.30142300 | -3.46962800 |
| H | -2.08975500 | 1.79139200  | -1.13019900 |
| H | -6.20222500 | 1.36972100  | -3.78410800 |
| C | 0.66566100  | -0.82783000 | 0.18216200  |
| C | 1.61965500  | -0.51323300 | -0.99530700 |
| C | 1.41879400  | -0.80332700 | 1.51914400  |
| H | 0.25170100  | -1.83141400 | 0.01435600  |
| C | 2.84394700  | -1.43425700 | -0.95996300 |
| H | 1.95833300  | 0.52812600  | -0.92160900 |
| H | 1.09025100  | -0.62505000 | -1.94727600 |
| C | 2.64629000  | -1.71910200 | 1.46523800  |
| H | 1.74011200  | 0.22101300  | 1.73776400  |
| H | 0.75508500  | -1.11418500 | 2.33426200  |
| H | 3.56454200  | -1.15787600 | -1.72867200 |
| H | 2.53750900  | -2.47523900 | -1.12662800 |
| H | 3.22073400  | -1.66406900 | 2.38727800  |
| H | 2.33262700  | -2.76212300 | 1.32344600  |
| N | 3.50888500  | -1.36017200 | 0.33860800  |
| C | 4.58948700  | -0.52205100 | 0.45963300  |
| O | 5.16422800  | -0.01156200 | -0.49417600 |
| O | 4.94044600  | -0.36819600 | 1.75677600  |
| C | 6.06490200  | 0.49545100  | 2.13825200  |
| C | 7.36887900  | -0.04157100 | 1.54647800  |
| H | 7.37030200  | 0.04084300  | 0.45900300  |
| H | 8.21545800  | 0.52802400  | 1.94618300  |
| H | 7.50600800  | -1.09328600 | 1.82171000  |
| C | 6.07252500  | 0.37326700  | 3.66166300  |
| H | 6.87746600  | 0.98342200  | 4.08421600  |
| H | 5.12114600  | 0.71580100  | 4.08238500  |
| H | 6.23011900  | -0.66687200 | 3.96620400  |
| C | 5.78200600  | 1.93759400  | 1.71421800  |
| H | 5.76810700  | 2.03262900  | 0.62761600  |
| H | 4.81500000  | 2.26692300  | 2.11089400  |
| H | 6.55780000  | 2.59871000  | 2.11635800  |

Ester product of rxn between 35 and c

|   |             |             |            |
|---|-------------|-------------|------------|
| C | -0.72197400 | -0.33623200 | 0.04067200 |
|---|-------------|-------------|------------|

|   |             |             |             |
|---|-------------|-------------|-------------|
| O | -1.28379100 | -0.42439500 | 1.11423700  |
| O | -1.17174300 | 0.42805700  | -0.97400300 |
| C | -2.37199700 | 1.19652800  | -0.70757100 |
| H | -3.18488900 | 0.50630900  | -0.45858100 |
| H | -2.19208500 | 1.83091500  | 0.16658800  |
| C | -2.69113100 | 2.00059300  | -1.93181500 |
| C | -3.43221100 | 1.35329800  | -3.07465500 |
| C | -4.13273700 | 2.36111600  | -2.20055100 |
| H | -1.94335300 | 2.74648300  | -2.19154000 |
| H | -3.70635300 | 0.30672000  | -2.96766400 |
| H | -3.16426500 | 1.64388400  | -4.08640100 |
| H | -4.34229900 | 3.34565600  | -2.60847700 |
| H | -4.88502800 | 1.99848000  | -1.50444300 |
| C | 0.57512500  | -1.02713100 | -0.33490400 |
| C | 1.71866400  | 0.01177400  | -0.41375500 |
| C | 0.92407700  | -2.15182800 | 0.64853500  |
| H | 0.44273500  | -1.44724400 | -1.34143800 |
| C | 3.05138500  | -0.68033800 | -0.71924900 |
| H | 1.80243100  | 0.53696400  | 0.54673400  |
| H | 1.49609800  | 0.75734600  | -1.18412000 |
| C | 2.28595000  | -2.76872900 | 0.31076100  |
| H | 0.95289500  | -1.74857600 | 1.66659900  |
| H | 0.14805100  | -2.92547000 | 0.63120000  |
| H | 3.87459000  | 0.03085500  | -0.71421000 |
| H | 3.00828100  | -1.14449300 | -1.71377500 |
| H | 2.58085100  | -3.50428000 | 1.05778000  |
| H | 2.24767400  | -3.26438700 | -0.66843500 |
| N | 3.32101300  | -1.73739500 | 0.25400500  |
| C | 4.11341100  | -1.55640600 | 1.35974200  |
| O | 4.16346200  | -2.34315700 | 2.29700200  |
| O | 4.84024300  | -0.41937700 | 1.25529100  |
| C | 5.76312800  | -0.01322400 | 2.32251200  |
| C | 4.98714700  | 0.23151700  | 3.61762200  |
| H | 4.56717300  | -0.69747700 | 4.00539300  |
| H | 5.65574200  | 0.65982700  | 4.37271900  |
| H | 4.17147500  | 0.94235000  | 3.44287500  |
| C | 6.33760100  | 1.29597200  | 1.78193600  |
| H | 7.05050900  | 1.71788300  | 2.49783700  |
| H | 6.85843800  | 1.12801700  | 0.83320100  |
| H | 5.54118000  | 2.02878600  | 1.61395800  |
| C | 6.86788800  | -1.05693300 | 2.49331900  |
| H | 6.46696000  | -1.99309500 | 2.88351800  |
| H | 7.35571400  | -1.25402300 | 1.53218300  |
| H | 7.62565900  | -0.67845400 | 3.18854400  |

Ester product of rxn between 35 and d

|   |             |             |             |
|---|-------------|-------------|-------------|
| C | -0.12955600 | 1.23848200  | -0.80934200 |
| O | -0.16312200 | 2.43876400  | -0.62994900 |
| O | -1.22204700 | 0.44749700  | -0.75370100 |
| C | -2.46817900 | 1.11132700  | -0.42291200 |
| H | -2.74889600 | 1.78209700  | -1.24104500 |
| H | -2.30462400 | 1.72171500  | 0.47259000  |
| C | -3.49846900 | 0.05405900  | -0.19100800 |
| H | -3.25325300 | -0.68952100 | 0.56641400  |
| C | -4.66835400 | 0.01143600  | -0.82711500 |
| H | -4.93078700 | 0.74252800  | -1.58944600 |
| H | -5.41180600 | -0.74988100 | -0.60600200 |
| C | 1.11548500  | 0.42005700  | -1.09203100 |
| C | 2.30465300  | 1.31018900  | -1.47518700 |
| C | 1.45879900  | -0.45973900 | 0.13258500  |
| H | 0.87907200  | -0.25504900 | -1.92616400 |
| C | 3.57144000  | 0.46983700  | -1.67073300 |
| H | 2.47806100  | 2.04708500  | -0.68329200 |
| H | 2.08156600  | 1.86864200  | -2.39130700 |
| C | 2.75154300  | -1.24392800 | -0.11845700 |
| H | 1.59497100  | 0.17886100  | 1.01507800  |
| H | 0.63548600  | -1.15022000 | 0.34265900  |
| H | 4.43970800  | 1.10188300  | -1.85147800 |
| H | 3.45027900  | -0.20640400 | -2.52802100 |
| H | 3.04108900  | -1.81628600 | 0.76001300  |
| H | 2.60058100  | -1.94760800 | -0.94873400 |
| N | 3.84098200  | -0.34312500 | -0.48685500 |
| C | 4.80881100  | 0.07733600  | 0.38897400  |
| O | 5.60166000  | 0.97872000  | 0.14563300  |
| O | 4.78013300  | -0.65022400 | 1.53021300  |
| C | 5.74514500  | -0.40131100 | 2.60848700  |
| C | 7.16797700  | -0.66555700 | 2.11372100  |
| H | 7.46448700  | 0.06608300  | 1.36117300  |
| H | 7.86675800  | -0.60988400 | 2.95599700  |
| H | 7.23807700  | -1.66898500 | 1.67910300  |
| C | 5.33883700  | -1.43403600 | 3.65932000  |
| H | 5.98720600  | -1.35292100 | 4.53785500  |
| H | 4.30312100  | -1.27484700 | 3.97795600  |
| H | 5.42507600  | -2.44954300 | 3.25834300  |
| C | 5.57064400  | 1.01789600  | 3.15133400  |
| H | 4.52845500  | 1.18682000  | 3.44511600  |
| H | 6.20018600  | 1.15216800  | 4.03811000  |
| H | 5.85155400  | 1.76185200  | 2.40480900  |

## Ester product of rxn between 35 and e

|   |             |             |             |
|---|-------------|-------------|-------------|
| C | -0.50698500 | 0.28215000  | 0.50456700  |
| O | -0.65585300 | 0.85058200  | 1.56751200  |
| O | -1.35140100 | 0.42015000  | -0.53824600 |
| C | -2.45236100 | 1.34631500  | -0.34349200 |
| H | -2.04577000 | 2.28674400  | 0.03987900  |
| C | 0.64340800  | -0.63939800 | 0.14847800  |
| C | 1.56855200  | 0.04772800  | -0.88452700 |
| C | 1.42922700  | -1.06581900 | 1.39557900  |
| H | 0.21283500  | -1.52812300 | -0.33330900 |
| C | 2.78612500  | -0.83228600 | -1.18955200 |
| H | 1.91779800  | 1.00680300  | -0.48048700 |
| H | 1.01306500  | 0.25622200  | -1.80467200 |
| C | 2.64678700  | -1.91014600 | 1.00506800  |
| H | 1.76689200  | -0.17531400 | 1.93722200  |
| H | 0.78277900  | -1.63126200 | 2.07647300  |
| H | 3.48909700  | -0.31649700 | -1.84250900 |
| H | 2.46646000  | -1.75926100 | -1.68320800 |
| H | 3.24424600  | -2.16771400 | 1.87675000  |
| H | 2.32148100  | -2.84503800 | 0.52916700  |
| N | 3.48397600  | -1.19296200 | 0.04231500  |
| C | 4.56578600  | -0.43255600 | 0.41216700  |
| O | 5.12447900  | 0.36250800  | -0.33372800 |
| O | 4.93621100  | -0.70292100 | 1.68454400  |
| C | 6.07122400  | -0.00810000 | 2.30522800  |
| C | 7.36273900  | -0.33338300 | 1.55381200  |
| H | 7.34552300  | 0.08285100  | 0.54582200  |
| H | 8.21857700  | 0.08528200  | 2.09516500  |
| H | 7.50018900  | -1.41839800 | 1.48675100  |
| C | 6.09687700  | -0.60889900 | 3.71026200  |
| H | 6.91255100  | -0.16903500 | 4.29338600  |
| H | 5.15397100  | -0.41378100 | 4.23212500  |
| H | 6.24883500  | -1.69252100 | 3.66506300  |
| C | 5.79396800  | 1.49495500  | 2.36649100  |
| H | 4.83120700  | 1.68339800  | 2.85495100  |
| H | 6.57583700  | 1.98971200  | 2.95346200  |
| H | 5.77363100  | 1.93335400  | 1.36787200  |
| H | -3.12747500 | 0.93788300  | 0.41401300  |
| C | -3.14273100 | 1.52784200  | -1.66489900 |
| C | -2.50156600 | 2.21686600  | -2.70298200 |
| C | -4.42342300 | 1.01070400  | -1.88016300 |
| C | -3.13097800 | 2.38397800  | -3.93476000 |
| H | -1.50463900 | 2.61912400  | -2.54107800 |

|   |             |            |             |
|---|-------------|------------|-------------|
| C | -5.05970000 | 1.18243700 | -3.11133400 |
| H | -4.92443600 | 0.47242200 | -1.07945400 |
| C | -4.41372800 | 1.86784700 | -4.14048400 |
| H | -2.62531800 | 2.92002300 | -4.73308700 |
| H | -6.05666900 | 0.77930400 | -3.26576100 |
| H | -4.90681600 | 2.00199200 | -5.09926300 |

Ester product of rxn between 35 and f

|   |             |             |             |
|---|-------------|-------------|-------------|
| C | -0.44207600 | 0.57945600  | 0.36840900  |
| O | -0.59587200 | 1.22652300  | 1.38346200  |
| O | -1.23441700 | 0.71264600  | -0.72012400 |
| C | -2.26903500 | 1.71694200  | -0.60218200 |
| H | -2.92466300 | 1.46343200  | 0.23798400  |
| H | -1.80869800 | 2.68526600  | -0.37736700 |
| C | -3.00922900 | 1.76279100  | -1.85521500 |
| C | -3.63858300 | 1.82330400  | -2.88265200 |
| H | -4.19285700 | 1.87242500  | -3.79433100 |
| C | 0.64837600  | -0.44207800 | 0.11863000  |
| C | 1.66652000  | 0.11597200  | -0.90443600 |
| C | 1.34620900  | -0.85103200 | 1.42285300  |
| H | 0.17302400  | -1.32327000 | -0.33385400 |
| C | 2.82029100  | -0.87217200 | -1.10922700 |
| H | 2.07479100  | 1.06450600  | -0.53269900 |
| H | 1.16839100  | 0.31782300  | -1.85809100 |
| C | 2.50717200  | -1.80908100 | 1.13338300  |
| H | 1.73155500  | 0.04219700  | 1.92692600  |
| H | 0.63058800  | -1.32401900 | 2.10491000  |
| H | 3.58898800  | -0.44846700 | -1.75422900 |
| H | 2.44716300  | -1.79575300 | -1.57118500 |
| H | 3.04763100  | -2.05888600 | 2.04356100  |
| H | 2.12500000  | -2.74280400 | 0.69900100  |
| N | 3.43555400  | -1.21940500 | 0.16883900  |
| C | 4.58037400  | -0.55625300 | 0.53509600  |
| O | 5.23980400  | 0.13536300  | -0.23125200 |
| O | 4.88468800  | -0.79382800 | 1.83134700  |
| C | 6.08026700  | -0.20416000 | 2.44737900  |
| C | 7.33996300  | -0.71678900 | 1.74813000  |
| H | 7.39795900  | -0.34897000 | 0.72288300  |
| H | 8.22716500  | -0.37962800 | 2.29583100  |
| H | 7.34611600  | -1.81242000 | 1.73210800  |
| C | 6.00550300  | -0.72982100 | 3.88051000  |
| H | 6.85376400  | -0.35638700 | 4.46344900  |
| H | 5.08041300  | -0.40019300 | 4.36524800  |
| H | 6.03166100  | -1.82461600 | 3.89340500  |



|   |            |            |            |
|---|------------|------------|------------|
| C | 5.98114400 | 1.32200300 | 2.42747500 |
| H | 6.02481000 | 1.70572100 | 1.40744900 |
| H | 5.04185100 | 1.64695900 | 2.88907500 |
| H | 6.80898800 | 1.75164700 | 3.00253000 |

Ester product of rxn between 35 and g

|   |             |             |             |
|---|-------------|-------------|-------------|
| C | -0.28191700 | 1.16800000  | -0.15873000 |
| O | -0.62168300 | 1.53303500  | 0.94677700  |
| O | -1.15677400 | 0.73036000  | -1.09352000 |
| C | -2.53264100 | 0.68266300  | -0.68674600 |
| H | -2.62236100 | 0.12249300  | 0.25134500  |
| H | -2.89803900 | 1.69875900  | -0.49375400 |
| C | -3.28349800 | 0.02995600  | -1.79583900 |
| C | -2.92263800 | -0.53006900 | -2.98358100 |
| C | -4.13870000 | -1.00038800 | -3.58990600 |
| H | -1.91962200 | -0.59904300 | -3.37748800 |
| C | -5.14044400 | -0.69001500 | -2.72490700 |
| H | -4.24242000 | -1.50073400 | -4.54269200 |
| H | -6.21016600 | -0.83465000 | -2.73159500 |
| O | -4.63444900 | -0.05850500 | -1.62167700 |
| C | 1.13839700  | 1.10710100  | -0.68190000 |
| C | 2.11203400  | 1.84173000  | 0.24894800  |
| C | 1.56928100  | -0.36518300 | -0.88369600 |
| H | 1.14167900  | 1.59043000  | -1.66895400 |
| C | 3.55344300  | 1.69185200  | -0.25006700 |
| H | 2.03384900  | 1.42644400  | 1.25987200  |
| H | 1.84725500  | 2.90304900  | 0.31469700  |
| C | 3.02942300  | -0.43941000 | -1.34344700 |
| H | 1.46868300  | -0.90807600 | 0.06480600  |
| H | 0.91753900  | -0.85156800 | -1.61646200 |
| H | 4.25771100  | 2.15218200  | 0.43919000  |
| H | 3.66593000  | 2.18210700  | -1.22680400 |
| H | 3.37109700  | -1.47219500 | -1.39793000 |
| H | 3.13482700  | 0.01572100  | -2.33733300 |
| N | 3.89939500  | 0.28060700  | -0.41839200 |
| C | 4.59107000  | -0.44597500 | 0.51827800  |
| O | 4.69029000  | -1.66678000 | 0.49285000  |
| O | 5.15863800  | 0.36500900  | 1.43975600  |
| C | 5.96944300  | -0.18588000 | 2.53418500  |
| C | 5.11202300  | -1.09759800 | 3.41288600  |
| H | 4.80610000  | -1.99233700 | 2.86934200  |
| H | 5.68373300  | -1.39946700 | 4.29756100  |
| H | 4.21633300  | -0.56505600 | 3.75193400  |
| C | 6.38307800  | 1.06956100  | 3.30138300  |

|   |            |             |            |
|---|------------|-------------|------------|
| H | 7.00395700 | 0.79848400  | 4.16148100 |
| H | 6.95805100 | 1.74459700  | 2.65864900 |
| H | 5.50171100 | 1.60722800  | 3.66682500 |
| C | 7.19583500 | -0.90402100 | 1.96958100 |
| H | 6.90687200 | -1.79835900 | 1.41614600 |
| H | 7.75152700 | -0.23763900 | 1.30038600 |
| H | 7.86177000 | -1.19487900 | 2.78988300 |

Ester product of rxn between 35 and h

|   |             |             |             |
|---|-------------|-------------|-------------|
| C | -1.01583700 | -0.79557100 | 0.30976700  |
| O | -1.43119200 | -0.47049600 | 1.40430600  |
| O | -1.55343700 | -0.36753900 | -0.84957200 |
| C | -2.66796200 | 0.56183900  | -0.72550000 |
| H | -3.47302600 | 0.06458300  | -0.17753800 |
| H | -2.33417400 | 1.41733200  | -0.13121300 |
| C | -3.09479200 | 0.96486500  | -2.10388800 |
| C | -4.15277200 | 0.32009500  | -2.74632300 |
| C | -2.42010900 | 1.98446600  | -2.79326400 |
| C | -4.54477600 | 0.67164400  | -4.03981300 |
| H | -4.68771000 | -0.47377700 | -2.23072300 |
| C | -2.79295200 | 2.34670600  | -4.07938100 |
| H | -1.59247200 | 2.49938700  | -2.31161500 |
| C | -3.86097900 | 1.69113800  | -4.71296400 |
| H | -5.37381600 | 0.15238700  | -4.50552900 |
| H | -2.27758800 | 3.13742300  | -4.61536400 |
| O | -4.15578500 | 2.11882400  | -5.97018400 |
| C | -5.23080800 | 1.48923000  | -6.65463100 |
| H | -5.29351200 | 1.97879600  | -7.62845800 |
| H | -5.04315500 | 0.41764100  | -6.80047200 |
| H | -6.18093800 | 1.62266700  | -6.12151400 |
| C | 0.18283800  | -1.68816900 | 0.05169600  |
| C | 1.39103700  | -0.81978300 | -0.37209300 |
| C | 0.52952400  | -2.54255500 | 1.27782100  |
| H | -0.06748700 | -2.34171800 | -0.79445300 |
| C | 2.63470200  | -1.69352800 | -0.56871900 |
| H | 1.59722200  | -0.07629400 | 0.40877200  |
| H | 1.15965800  | -0.28034600 | -1.29678400 |
| C | 1.80413700  | -3.35739400 | 1.03109300  |
| H | 0.67838100  | -1.88989900 | 2.14483300  |
| H | -0.30174700 | -3.21504900 | 1.51929500  |
| H | 3.50754200  | -1.08852200 | -0.80414900 |
| H | 2.46880800  | -2.39066900 | -1.40142800 |
| H | 2.10823300  | -3.89489600 | 1.92817100  |
| H | 1.63860500  | -4.08836400 | 0.22802900  |

|   |            |             |            |
|---|------------|-------------|------------|
| N | 2.90577000 | -2.48501400 | 0.62942200 |
| C | 3.83943900 | -2.13739800 | 1.57199100 |
| O | 3.93518300 | -2.67800700 | 2.66695100 |
| O | 4.64245800 | -1.14664900 | 1.11766900 |
| C | 5.74247300 | -0.62916300 | 1.94085300 |
| C | 5.18995500 | -0.00806200 | 3.22474900 |
| H | 4.75063400 | -0.76810200 | 3.87183000 |
| H | 5.99810500 | 0.49480500  | 3.76755900 |
| H | 4.42447400 | 0.73860800  | 2.98520500 |
| C | 6.34956500 | 0.44632100  | 1.04056900 |
| H | 7.20020500 | 0.92091900  | 1.54064700 |
| H | 6.70048100 | 0.01054900  | 0.09908800 |
| H | 5.60929600 | 1.21954200  | 0.80888400 |
| C | 6.75813400 | -1.73799900 | 2.21934500 |
| H | 6.32723400 | -2.51442000 | 2.85274900 |
| H | 7.09172000 | -2.19223600 | 1.27956600 |
| H | 7.63474800 | -1.31614200 | 2.72371600 |

Ester product of rxn between 35 and i

|   |             |             |             |
|---|-------------|-------------|-------------|
| C | -0.31020700 | 0.88159900  | -0.41485900 |
| O | -0.24487000 | 2.08418900  | -0.24950800 |
| O | -1.43632400 | 0.14880100  | -0.33342900 |
| C | -2.70647300 | 0.78198400  | 0.02454900  |
| C | -3.15713300 | 1.77348000  | -1.04169500 |
| H | -4.19376800 | 2.07023800  | -0.84462900 |
| H | -2.53087700 | 2.66756100  | -1.04412200 |
| H | -3.11986600 | 1.31178000  | -2.03440800 |
| C | -2.66306100 | 1.35857900  | 1.43478200  |
| H | -2.28311800 | 0.61289600  | 2.14182100  |
| H | -2.02987500 | 2.24668400  | 1.48354000  |
| H | -3.67776200 | 1.63369600  | 1.74460700  |
| H | -3.38254600 | -0.07824700 | 0.01564900  |
| C | 0.88232000  | -0.01528400 | -0.69739200 |
| C | 2.04914900  | 0.76699000  | -1.31415700 |
| C | 1.32135300  | -0.70756600 | 0.61447400  |
| H | 0.55344500  | -0.79827100 | -1.39305300 |
| C | 3.27793900  | -0.13249400 | -1.48533200 |
| H | 2.30402700  | 1.61024700  | -0.66332400 |
| H | 1.75553600  | 1.18457100  | -2.28432400 |
| C | 2.57184300  | -1.56202300 | 0.37956100  |
| H | 1.54805700  | 0.05584200  | 1.36988400  |
| H | 0.50742900  | -1.33053400 | 1.00093600  |
| H | 4.13732900  | 0.43664700  | -1.83695100 |
| H | 3.06774100  | -0.92862500 | -2.21268000 |

|   |            |             |             |
|---|------------|-------------|-------------|
| H | 2.92902200 | -2.00061700 | 1.30876000  |
| H | 2.33602300 | -2.38051500 | -0.31450500 |
| N | 3.63908300 | -0.76229900 | -0.21707500 |
| C | 4.69057800 | -0.24474600 | 0.49449600  |
| O | 5.47352700 | 0.58380400  | 0.04623100  |
| O | 4.75500900 | -0.78988600 | 1.73219600  |
| C | 5.82079600 | -0.41134800 | 2.66831500  |
| C | 7.18574200 | -0.79545200 | 2.09513900  |
| H | 7.42313800 | -0.19987500 | 1.21278100  |
| H | 7.96150800 | -0.63224800 | 2.85167700  |
| H | 7.19686000 | -1.85597400 | 1.81958100  |
| C | 5.49535400 | -1.25694600 | 3.89923600  |
| H | 6.22709200 | -1.06603200 | 4.69099600  |
| H | 4.49884000 | -1.01395500 | 4.28315400  |
| H | 5.52068500 | -2.32405700 | 3.65418700  |
| C | 5.72512300 | 1.07912900  | 2.99787300  |
| H | 5.94954000 | 1.69040100  | 2.12297400  |
| H | 4.71797000 | 1.32547200  | 3.35268500  |
| H | 6.43616100 | 1.32630300  | 3.79419000  |

Ester product of rxn between 35 and j

|   |             |             |             |
|---|-------------|-------------|-------------|
| C | -0.49604900 | -0.19824500 | -0.25267200 |
| O | -1.02981900 | -1.01628700 | 0.46805900  |
| O | -1.14175200 | 0.89499400  | -0.72513400 |
| C | -2.49348400 | 1.03948600  | -0.27734500 |
| C | -3.25649000 | 2.11752700  | -1.04954200 |
| C | -3.52645900 | 0.07148700  | -0.86665800 |
| H | -2.51202500 | 1.12321200  | 0.81054500  |
| H | -2.70646900 | 2.49602800  | -1.92079700 |
| H | -3.64986100 | 2.95814600  | -0.46696400 |
| H | -3.12061000 | -0.58257900 | -1.64865000 |
| H | -4.10584700 | -0.52163600 | -0.15193100 |
| O | -4.29036200 | 1.17406700  | -1.41677200 |
| C | 0.94516100  | -0.22452000 | -0.71419900 |
| C | 1.76066100  | 0.83607000  | 0.06348300  |
| C | 1.56569400  | -1.61838300 | -0.55151900 |
| H | 0.95558900  | 0.06250000  | -1.77447600 |
| C | 3.23761200  | 0.77418800  | -0.34159900 |
| H | 1.67733600  | 0.64241100  | 1.14065200  |
| H | 1.35926700  | 1.83644800  | -0.12973300 |
| C | 3.05013600  | -1.59905700 | -0.93300700 |
| H | 1.46381700  | -1.94253900 | 0.48982600  |
| H | 1.03004200  | -2.34696500 | -1.17070500 |
| H | 3.83499100  | 1.46869100  | 0.24495100  |

|   |            |             |             |
|---|------------|-------------|-------------|
| H | 3.34166800 | 1.04551800  | -1.40107300 |
| H | 3.52035500 | -2.56089000 | -0.73376400 |
| H | 3.16505000 | -1.37115900 | -2.00144500 |
| N | 3.76524800 | -0.57736800 | -0.17150600 |
| C | 4.50482600 | -0.97185100 | 0.91476400  |
| O | 4.77992900 | -2.13950000 | 1.16113300  |
| O | 4.90005100 | 0.09531200  | 1.64697300  |
| C | 5.73917600 | -0.07787500 | 2.84045100  |
| C | 4.99601000 | -0.90720700 | 3.88878200  |
| H | 4.85397100 | -1.93403900 | 3.54991100  |
| H | 5.56978100 | -0.91889500 | 4.82227600  |
| H | 4.01563200 | -0.46440300 | 4.09797600  |
| C | 5.92497700 | 1.36009700  | 3.32363700  |
| H | 6.54328000 | 1.37738700  | 4.22706100  |
| H | 6.41708300 | 1.96633200  | 2.55572900  |
| H | 4.95775000 | 1.81742100  | 3.55799400  |
| C | 7.08294900 | -0.69627600 | 2.45266500  |
| H | 7.56133700 | -0.10314800 | 1.66526400  |
| H | 7.74827700 | -0.70593600 | 3.32336200  |
| H | 6.95581300 | -1.71915200 | 2.09588600  |

Ester product of rxn between 35 and k

|   |             |             |             |
|---|-------------|-------------|-------------|
| C | -0.46699400 | 0.07409000  | -0.36353700 |
| O | -0.75492700 | 0.49917400  | 0.73609200  |
| O | -1.29607900 | 0.11777100  | -1.43199100 |
| C | -2.57930500 | 0.77305000  | -1.23042000 |
| H | -2.87321800 | 0.60618200  | -0.19218800 |
| C | -2.45262100 | 2.26490800  | -1.47398200 |
| C | -3.45716000 | 3.11271300  | -0.99320100 |
| C | -1.38691700 | 2.81036000  | -2.19478900 |
| C | -3.39747700 | 4.48472300  | -1.22864000 |
| H | -4.28903900 | 2.69286800  | -0.43308400 |
| C | -1.32629100 | 4.18586700  | -2.43062300 |
| H | -0.60297200 | 2.15959300  | -2.56733800 |
| C | -2.33011400 | 5.02631600  | -1.94984100 |
| H | -4.18122100 | 5.13234600  | -0.84556600 |
| H | -0.49137800 | 4.59869000  | -2.99033600 |
| H | -2.28129100 | 6.09620500  | -2.13186200 |
| C | -3.56896800 | 0.09141200  | -2.15108600 |
| C | -4.51508500 | -0.78972200 | -1.61943000 |
| C | -3.54521700 | 0.31791500  | -3.53249400 |
| C | -5.42771800 | -1.43812800 | -2.45366500 |
| H | -4.53644100 | -0.96790200 | -0.54705100 |
| C | -4.45014700 | -0.33401700 | -4.36779700 |

|   |             |             |             |
|---|-------------|-------------|-------------|
| H | -2.82346600 | 1.01364300  | -3.94965500 |
| C | -5.39537500 | -1.21209200 | -3.82995200 |
| H | -6.16136800 | -2.11724600 | -2.02836800 |
| H | -4.42375400 | -0.15226600 | -5.43864700 |
| H | -6.10501200 | -1.71408400 | -4.48173500 |
| C | 0.85091300  | -0.58505200 | -0.71081800 |
| C | 2.02077400  | 0.34449900  | -0.33053400 |
| C | 0.97117400  | -1.93711000 | 0.02603400  |
| H | 0.87150600  | -0.76859600 | -1.79099800 |
| C | 3.36458000  | -0.35724800 | -0.55172100 |
| H | 1.92683300  | 0.62455100  | 0.72457800  |
| H | 1.97991000  | 1.26725600  | -0.92219600 |
| C | 2.35149300  | -2.56081300 | -0.20647700 |
| H | 0.82580400  | -1.77545400 | 1.10037200  |
| H | 0.18779600  | -2.62361200 | -0.31679100 |
| H | 4.19319600  | 0.26892600  | -0.22815500 |
| H | 3.50268600  | -0.57808100 | -1.61865200 |
| H | 2.47377300  | -3.47080600 | 0.37946700  |
| H | 2.48197400  | -2.80876000 | -1.26791200 |
| N | 3.40873900  | -1.62652100 | 0.17360100  |
| C | 3.95906700  | -1.75482800 | 1.42535200  |
| O | 3.79057300  | -2.73190000 | 2.14428100  |
| O | 4.72346000  | -0.68172200 | 1.73116800  |
| C | 5.41259900  | -0.58926800 | 3.02489300  |
| C | 4.38925300  | -0.58191000 | 4.16168400  |
| H | 3.87547500  | -1.54134500 | 4.23528800  |
| H | 4.89613600  | -0.37915000 | 5.11177600  |
| H | 3.64521800  | 0.20585400  | 3.99802700  |
| C | 6.11919600  | 0.76227000  | 2.92634400  |
| H | 6.67929200  | 0.96200700  | 3.84570500  |
| H | 6.82044600  | 0.77205700  | 2.08513500  |
| H | 5.39322200  | 1.56927700  | 2.78108100  |
| C | 6.43019300  | -1.72235700 | 3.16292200  |
| H | 5.93291700  | -2.69068100 | 3.23031500  |
| H | 7.10750300  | -1.73094000 | 2.30163400  |
| H | 7.03034600  | -1.56859000 | 4.06679000  |

Ester product of rxn between 35 and 1

|   |             |             |             |
|---|-------------|-------------|-------------|
| C | -0.12694000 | 1.19370800  | -0.67616400 |
| O | -0.28219500 | 2.31376400  | -0.23068500 |
| O | -1.13511000 | 0.39621400  | -1.08097600 |
| C | -2.48538100 | 0.91817600  | -0.94614800 |
| C | -2.81115000 | 1.86223800  | -2.11763300 |
| C | -3.43192000 | -0.27253200 | -0.90710300 |

|   |             |             |             |
|---|-------------|-------------|-------------|
| H | -2.52738400 | 1.46251600  | 0.00150600  |
| C | -4.31913400 | 1.85966000  | -2.45449800 |
| H | -2.23176800 | 1.53437300  | -2.98879100 |
| H | -2.47019000 | 2.87087300  | -1.86541000 |
| C | -4.87216600 | 0.20579800  | -0.61028000 |
| H | -3.38915300 | -0.78530400 | -1.87618700 |
| H | -3.09755700 | -0.99160000 | -0.15171100 |
| C | -5.16002100 | 1.60826100  | -1.19737800 |
| H | -4.53629000 | 1.07473100  | -3.19078100 |
| H | -4.59644600 | 2.80999900  | -2.92408100 |
| H | -5.04085200 | 0.22203300  | 0.47297800  |
| H | -5.57714100 | -0.52451000 | -1.02408800 |
| H | -4.92157300 | 2.38020200  | -0.45349100 |
| H | -6.22849500 | 1.71164800  | -1.41801500 |
| C | 1.20722100  | 0.48451600  | -0.80602200 |
| C | 2.37229300  | 1.48024000  | -0.89120700 |
| C | 1.39453300  | -0.47964800 | 0.38904700  |
| H | 1.17328800  | -0.12244200 | -1.72012100 |
| C | 3.71730900  | 0.74573900  | -0.90802900 |
| H | 2.33707400  | 2.15360900  | -0.02814900 |
| H | 2.27541500  | 2.10100900  | -1.78963000 |
| C | 2.77020000  | -1.15211100 | 0.32372200  |
| H | 1.31640800  | 0.08358200  | 1.32785300  |
| H | 0.60380800  | -1.23784400 | 0.38635700  |
| H | 4.54992200  | 1.44699900  | -0.87360700 |
| H | 3.80991900  | 0.14154400  | -1.82064300 |
| H | 2.94148000  | -1.78514200 | 1.19158900  |
| H | 2.83169500  | -1.78082500 | -0.57502800 |
| N | 3.83119200  | -0.15029500 | 0.24105400  |
| C | 4.55767400  | 0.27171000  | 1.32553600  |
| O | 5.29785900  | 1.24747800  | 1.31060400  |
| O | 4.36388200  | -0.54531300 | 2.38720000  |
| C | 5.06694200  | -0.31470600 | 3.65546900  |
| C | 6.57758700  | -0.43398200 | 3.44967900  |
| H | 6.95257400  | 0.37175200  | 2.81739900  |
| H | 7.08556300  | -0.38816300 | 4.41957400  |
| H | 6.82258700  | -1.39432100 | 2.98222400  |
| C | 4.54985200  | -1.45543900 | 4.53154900  |
| H | 5.00286200  | -1.40100300 | 5.52684600  |
| H | 3.46194400  | -1.39532400 | 4.64297600  |
| H | 4.79903800  | -2.42636600 | 4.09035500  |
| C | 4.66248100  | 1.03968000  | 4.23964700  |
| H | 3.57155400  | 1.10839400  | 4.31768100  |
| H | 5.08294400  | 1.14735300  | 5.24585200  |

|   |            |            |            |
|---|------------|------------|------------|
| H | 5.02322700 | 1.85968600 | 3.61762100 |
|---|------------|------------|------------|

Ester product of rxn between 35 and m

|   |             |             |             |
|---|-------------|-------------|-------------|
| C | -0.60428900 | 0.20559000  | 0.24575600  |
| O | -0.81445200 | 0.72280800  | 1.32599200  |
| O | -1.37957600 | 0.33328900  | -0.84509300 |
| C | -2.57731300 | 1.19344400  | -0.85250400 |
| C | -2.17744500 | 2.64217100  | -0.57061000 |
| H | -3.04477700 | 3.29553000  | -0.71670300 |
| H | -1.81742500 | 2.76432500  | 0.45208600  |
| H | -1.39098100 | 2.96169100  | -1.26339200 |
| C | -3.08925000 | 1.04156300  | -2.28368200 |
| H | -3.99277000 | 1.64357400  | -2.42538300 |
| H | -2.33396700 | 1.37614700  | -3.00258900 |
| H | -3.33216600 | -0.00414200 | -2.49974100 |
| C | -3.60295600 | 0.66487200  | 0.15102700  |
| H | -3.80759500 | -0.39506500 | -0.03640600 |
| H | -3.25021800 | 0.77971200  | 1.17700800  |
| H | -4.54263500 | 1.21717200  | 0.03893200  |
| C | 0.60337000  | -0.66059300 | -0.07299500 |
| C | 1.56608800  | 0.10604000  | -1.01006300 |
| C | 1.32719400  | -1.11646600 | 1.20043400  |
| H | 0.23972800  | -1.54033800 | -0.62158400 |
| C | 2.82700100  | -0.72073800 | -1.28373100 |
| H | 1.85823600  | 1.05270500  | -0.53721900 |
| H | 1.06059900  | 0.34589500  | -1.95103100 |
| C | 2.59396900  | -1.90477400 | 0.85054700  |
| H | 1.59939600  | -0.24033800 | 1.79909400  |
| H | 0.66169800  | -1.73284700 | 1.81572500  |
| H | 3.55224900  | -0.15229700 | -1.86458200 |
| H | 2.56624200  | -1.62890800 | -1.84347600 |
| H | 3.14863900  | -2.17802600 | 1.74536600  |
| H | 2.32660100  | -2.83012700 | 0.32179300  |
| N | 3.46137600  | -1.12487900 | -0.03227400 |
| C | 4.54344600  | -0.40665900 | 0.40835000  |
| O | 5.14339600  | 0.41069700  | -0.27971400 |
| O | 4.86467000  | -0.74266600 | 1.67914000  |
| C | 6.01153500  | -0.12495800 | 2.35621800  |
| C | 7.30591300  | -0.47338100 | 1.62009700  |
| H | 7.32929300  | -0.01554800 | 0.63036700  |
| H | 8.16561900  | -0.11386200 | 2.19669200  |
| H | 7.39988500  | -1.55956400 | 1.51033500  |
| C | 5.97785200  | -0.78742200 | 3.73321800  |
| H | 6.79804600  | -0.41039800 | 4.35285200  |



|   |            |             |            |
|---|------------|-------------|------------|
| H | 5.03248300 | -0.57349300 | 4.24311600 |
| H | 6.08341200 | -1.87375500 | 3.64294900 |
| C | 5.79842300 | 1.38462800  | 2.47950400 |
| H | 5.82331400 | 1.86725100  | 1.50169900 |
| H | 4.83222400 | 1.59389500  | 2.95233900 |
| H | 6.58538300 | 1.81707000  | 3.10756500 |

Ester product of rxn between 36 and a

|   |             |             |             |
|---|-------------|-------------|-------------|
| C | -1.05518300 | 0.78345200  | 0.25067100  |
| O | -1.92965200 | 1.44933800  | 0.76569600  |
| O | -1.18580000 | 0.16736800  | -0.93924600 |
| C | -2.44073600 | 0.37746700  | -1.60919700 |
| H | -2.59350700 | 1.44090600  | -1.81304000 |
| H | -2.37178200 | -0.18205600 | -2.54291400 |
| H | -3.27006700 | 0.00436300  | -1.00211100 |
| C | 0.33470000  | 0.58148600  | 0.82475900  |
| H | 0.70346400  | -0.41222000 | 0.55820200  |
| H | 0.25072100  | 0.64815800  | 1.91327100  |
| C | 1.27370400  | 1.65082100  | 0.29386800  |
| C | 1.09967000  | 2.98830800  | 0.67309100  |
| C | 2.29976700  | 1.32613600  | -0.59886700 |
| C | 1.94412500  | 3.97991700  | 0.17559500  |
| H | 0.29451500  | 3.24804600  | 1.35493200  |
| C | 3.14756000  | 2.31778700  | -1.09624500 |
| H | 2.43592100  | 0.29189200  | -0.90425100 |
| C | 2.97216900  | 3.64717300  | -0.71004700 |
| H | 1.79987300  | 5.01306300  | 0.47967100  |
| H | 3.94372200  | 2.05021400  | -1.78559900 |
| H | 3.63175400  | 4.41952400  | -1.09575700 |

Ester product of rxn between 36 and b

|   |             |             |             |
|---|-------------|-------------|-------------|
| C | 0.22317200  | 0.94698600  | -1.52676000 |
| O | 0.36900800  | 1.99330300  | -2.12550900 |
| O | -0.94139200 | 0.27941000  | -1.45067900 |
| C | -2.07647300 | 0.90332600  | -2.09532700 |
| C | -3.29293600 | 0.03446000  | -1.83210000 |
| H | -2.20067000 | 1.91232400  | -1.68852800 |
| C | -4.55788200 | 0.61199700  | -2.47692000 |
| H | -3.10456000 | -0.97568500 | -2.21866000 |
| H | -3.43628500 | -0.06133900 | -0.74796900 |
| C | -5.79501300 | -0.24920600 | -2.21635400 |
| H | -4.40172400 | 0.71291800  | -3.55983400 |
| H | -4.73022600 | 1.62754000  | -2.09466100 |
| H | -5.66403200 | -1.26224300 | -2.61657300 |

|   |             |             |             |
|---|-------------|-------------|-------------|
| H | -5.99423700 | -0.34054000 | -1.14143400 |
| H | -1.86681300 | 0.99782500  | -3.16627900 |
| H | -6.68653800 | 0.18236100  | -2.68574000 |
| C | 1.30539300  | 0.25170500  | -0.72035600 |
| H | 2.27018900  | 0.55618300  | -1.13524200 |
| H | 1.20090300  | -0.83167300 | -0.82304300 |
| C | 1.19597400  | 0.65404700  | 0.73955500  |
| C | 0.74674700  | -0.25364300 | 1.70378100  |
| C | 1.51073800  | 1.96189400  | 1.13132800  |
| C | 0.62521300  | 0.13286500  | 3.03983300  |
| H | 0.49192600  | -1.26753600 | 1.40635600  |
| C | 1.38794800  | 2.35008500  | 2.46486400  |
| H | 1.84693800  | 2.67563900  | 0.38398200  |
| C | 0.94574100  | 1.43559700  | 3.42400600  |
| H | 0.27902600  | -0.58442400 | 3.77902200  |
| H | 1.63793200  | 3.36681400  | 2.75549000  |
| H | 0.85233600  | 1.73712400  | 4.46358200  |

Ester product of rxn between 36 and c

|   |             |             |             |
|---|-------------|-------------|-------------|
| C | -2.02886600 | 0.66973200  | 0.96640800  |
| O | -2.99451900 | 1.23153500  | 1.44083300  |
| O | -1.83156900 | 0.49452700  | -0.35220400 |
| C | -2.82204000 | 1.08743300  | -1.22973400 |
| H | -3.78980400 | 0.60924400  | -1.04368200 |
| H | -2.91723400 | 2.14852500  | -0.97805300 |
| C | -2.36865900 | 0.88097600  | -2.64349000 |
| C | -2.63503100 | -0.43655500 | -3.32708000 |
| C | -3.41228200 | 0.78958900  | -3.73074600 |
| H | -1.43968600 | 1.38665400  | -2.89690500 |
| H | -3.15228100 | -1.20428900 | -2.75703800 |
| H | -1.88118100 | -0.81872200 | -4.00941300 |
| H | -3.19028100 | 1.25364500  | -4.68730300 |
| H | -4.45760800 | 0.85124800  | -3.43836400 |
| C | -0.86268900 | 0.11418500  | 1.76668900  |
| H | -1.20569400 | -0.02785900 | 2.79393400  |
| H | -0.57256700 | -0.85556300 | 1.35125900  |
| C | 0.30542600  | 1.08115900  | 1.71612600  |
| C | 0.39854700  | 2.12382000  | 2.64550500  |
| C | 1.27332300  | 0.98012200  | 0.70996400  |
| C | 1.44717300  | 3.04203100  | 2.57835400  |
| H | -0.35563900 | 2.21489800  | 3.42297100  |
| C | 2.32283200  | 1.89651600  | 0.64183600  |
| H | 1.19997000  | 0.18144900  | -0.02308100 |
| C | 2.41309100  | 2.93014200  | 1.57655700  |

|   |            |            |             |
|---|------------|------------|-------------|
| H | 1.50928300 | 3.84399800 | 3.30888100  |
| H | 3.07060400 | 1.80286000 | -0.14106100 |
| H | 3.23148000 | 3.64288800 | 1.52511000  |

Ester product of rxn between 36 and d

|   |             |             |             |
|---|-------------|-------------|-------------|
| C | -1.01611000 | 2.29615400  | -0.42270000 |
| O | -1.85558700 | 3.14575500  | -0.20958200 |
| O | -1.28664400 | 1.08643000  | -0.94883000 |
| C | -2.68707800 | 0.80422200  | -1.19978700 |
| H | -3.04364700 | 1.44058400  | -2.01586900 |
| H | -3.25364900 | 1.06089200  | -0.29749600 |
| C | -2.80371300 | -0.64789700 | -1.53224400 |
| H | -2.40270600 | -1.33707700 | -0.79007400 |
| C | -3.38489800 | -1.10704000 | -2.63972100 |
| H | -3.78800400 | -0.43418100 | -3.39426500 |
| H | -3.48790200 | -2.17183400 | -2.83180200 |
| C | 0.46070500  | 2.42365100  | -0.09154900 |
| H | 1.05129700  | 1.99787800  | -0.90785700 |
| H | 0.68776300  | 3.48900300  | -0.00696000 |
| C | 0.75949200  | 1.70187200  | 1.20934200  |
| C | 1.24128000  | 0.38821400  | 1.20556400  |
| C | 0.50475500  | 2.32893800  | 2.43509900  |
| C | 1.47769000  | -0.28311400 | 2.40577200  |
| H | 1.43096600  | -0.10856500 | 0.25788600  |
| C | 0.73906700  | 1.65874300  | 3.63596900  |
| H | 0.12023600  | 3.34553400  | 2.44491700  |
| C | 1.22757500  | 0.35067700  | 3.62447700  |
| H | 1.85757400  | -1.30100800 | 2.38847900  |
| H | 0.54111900  | 2.15881100  | 4.58009600  |
| H | 1.41343200  | -0.17086600 | 4.55926700  |

Ester product of rxn between 36 and e

|   |             |             |             |
|---|-------------|-------------|-------------|
| C | -2.24489100 | 0.46438900  | 2.02751200  |
| O | -3.04273400 | 1.25885200  | 1.57553900  |
| O | -2.53285000 | -0.81591700 | 2.34512300  |
| C | -3.74885300 | -1.37428500 | 1.76740300  |
| H | -4.08119300 | -2.12639600 | 2.48475200  |
| H | -4.49623300 | -0.58330300 | 1.68948500  |
| C | -3.40768900 | -1.98237200 | 0.43343200  |
| C | -3.08660600 | -3.34072900 | 0.33698300  |
| C | -3.30763400 | -1.17408700 | -0.70743700 |
| C | -2.67377500 | -3.88748800 | -0.87869700 |
| H | -3.15503000 | -3.97028600 | 1.22101300  |
| C | -2.88666400 | -1.71698800 | -1.92020800 |

|   |             |             |             |
|---|-------------|-------------|-------------|
| H | -3.54356300 | -0.11715500 | -0.63476700 |
| C | -2.56912900 | -3.07428100 | -2.00851100 |
| H | -2.43039700 | -4.94454800 | -0.94242800 |
| H | -2.80166400 | -1.07929200 | -2.79538700 |
| H | -2.24180400 | -3.49633300 | -2.95471200 |
| C | -0.76182800 | 0.73176700  | 2.20405800  |
| H | -0.61565300 | 1.80079900  | 2.37230100  |
| H | -0.37903100 | 0.17098400  | 3.06107300  |
| C | -0.09334000 | 0.28391200  | 0.91435000  |
| C | 0.15650600  | 1.20438700  | -0.10925900 |
| C | 0.17258300  | -1.07268000 | 0.68884500  |
| C | 0.67728900  | 0.77955000  | -1.33244200 |
| H | -0.06527200 | 2.25611300  | 0.05178100  |
| C | 0.68781300  | -1.49898300 | -0.53412000 |
| H | -0.04713300 | -1.79644800 | 1.46743400  |
| C | 0.94179300  | -0.57376200 | -1.54879500 |
| H | 0.87009800  | 1.50568000  | -2.11750800 |
| H | 0.87815900  | -2.55563200 | -0.69859000 |
| H | 1.34040200  | -0.90630900 | -2.50325300 |

Ester product of rxn between 36 and f

|   |             |             |             |
|---|-------------|-------------|-------------|
| C | -1.75568000 | 0.03388100  | 0.67632100  |
| O | -2.81178400 | 0.35505300  | 1.17826100  |
| O | -1.43303700 | 0.28278000  | -0.61084300 |
| C | -2.43261600 | 1.01750600  | -1.35625300 |
| H | -3.37488600 | 0.45919300  | -1.34453100 |
| H | -2.61414500 | 1.97848100  | -0.86267200 |
| C | -1.94629100 | 1.20486400  | -2.71563800 |
| C | -1.56886900 | 1.37559200  | -3.84868100 |
| H | -1.23044300 | 1.52311300  | -4.85094800 |
| C | -0.60664500 | -0.64048900 | 1.40156300  |
| H | -1.03121600 | -1.20392000 | 2.23614900  |
| H | -0.10356900 | -1.33338300 | 0.72209500  |
| C | 0.36580700  | 0.41282700  | 1.90192700  |
| C | 1.51499400  | 0.73085800  | 1.16989400  |
| C | 0.09346600  | 1.11613800  | 3.08161500  |
| C | 2.38538600  | 1.72605100  | 1.61641900  |
| H | 1.72753700  | 0.19684700  | 0.24760600  |
| C | 0.96211500  | 2.11178400  | 3.52848100  |
| H | -0.80407900 | 0.88227700  | 3.64804300  |
| C | 2.11150000  | 2.41877100  | 2.79711600  |
| H | 3.27724800  | 1.95963100  | 1.04143800  |
| H | 0.74132900  | 2.64708200  | 4.44787300  |
| H | 2.78987900  | 3.19235300  | 3.14590600  |

## Ester product of rxn between 36 and g

|   |             |             |             |
|---|-------------|-------------|-------------|
| C | -1.66703000 | 2.20590900  | 0.29818700  |
| O | -2.66511300 | 2.57070100  | 0.88341900  |
| O | -1.68182000 | 1.41325700  | -0.79126300 |
| C | -2.99685200 | 0.95423500  | -1.21165900 |
| H | -3.49332900 | 0.47270100  | -0.36613700 |
| H | -3.58867500 | 1.82453200  | -1.50991100 |
| C | -2.83032300 | -0.00434500 | -2.32426300 |
| C | -2.87109500 | -1.36689800 | -2.39363600 |
| C | -2.61770600 | -1.71535400 | -3.76070000 |
| H | -3.05732800 | -2.03978400 | -1.56793800 |
| C | -2.43986700 | -0.53699000 | -4.42077000 |
| H | -2.57708300 | -2.70704800 | -4.18898900 |
| H | -2.23126100 | -0.28330400 | -5.44947100 |
| O | -2.56732500 | 0.51375800  | -3.56502300 |
| C | -0.24138000 | 2.52226600  | 0.71523200  |
| H | 0.36345200  | 2.70233800  | -0.17822600 |
| H | -0.26742200 | 3.43321600  | 1.31742900  |
| C | 0.32491100  | 1.36384400  | 1.51588600  |
| C | 0.18038700  | 1.33073800  | 2.90753500  |
| C | 0.94961800  | 0.28937400  | 0.87130400  |
| C | 0.66399200  | 0.24904000  | 3.64479900  |
| H | -0.31361500 | 2.15641500  | 3.41301200  |
| C | 1.43379800  | -0.79230400 | 1.60692000  |
| H | 1.05178000  | 0.30130300  | -0.21025100 |
| C | 1.29315900  | -0.81503200 | 2.99628100  |
| H | 0.54923200  | 0.23858700  | 4.72522900  |
| H | 1.92167600  | -1.61713100 | 1.09474000  |
| H | 1.67243400  | -1.65640300 | 3.56954000  |

## Ester product of rxn between 36 and h

|   |             |            |             |
|---|-------------|------------|-------------|
| C | -0.69002900 | 3.40054700 | -0.27716600 |
| O | -1.61753900 | 3.78330500 | 0.40542700  |
| O | -0.62741100 | 3.51674300 | -1.61984600 |
| C | -1.90339700 | 3.69652900 | -2.31271000 |
| H | -2.53822800 | 4.35118600 | -1.71400800 |
| H | -1.63930500 | 4.19241700 | -3.24808000 |
| C | -2.51036600 | 2.34190000 | -2.53751200 |
| C | -3.27587300 | 1.73063500 | -1.53975900 |
| C | -2.19637200 | 1.59938100 | -3.68520000 |
| C | -3.70622100 | 0.41010900 | -1.66292900 |
| H | -3.51658700 | 2.28454200 | -0.63818300 |
| C | -2.62365600 | 0.28626400 | -3.82772000 |

|   |             |             |             |
|---|-------------|-------------|-------------|
| H | -1.59810500 | 2.05423700  | -4.47110800 |
| C | -3.36685700 | -0.32358300 | -2.80585200 |
| H | -4.28097600 | -0.03737100 | -0.86136800 |
| H | -2.37959200 | -0.29471100 | -4.71159700 |
| O | -3.70699200 | -1.62488500 | -3.01452700 |
| C | -4.40239700 | -2.30313300 | -1.97698500 |
| H | -4.53815900 | -3.32833700 | -2.32756200 |
| H | -3.82282900 | -2.31078600 | -1.04524400 |
| H | -5.38610300 | -1.85376000 | -1.78907800 |
| C | 0.49969200  | 2.61683600  | 0.24653500  |
| H | 1.38739800  | 2.83523400  | -0.35329900 |
| H | 0.68094800  | 2.90323400  | 1.28470100  |
| C | 0.11821700  | 1.14848600  | 0.14414000  |
| C | -0.42931800 | 0.48096900  | 1.24524300  |
| C | 0.20679800  | 0.47707400  | -1.08204600 |
| C | -0.86293500 | -0.84068800 | 1.12976600  |
| H | -0.51963200 | 1.00183500  | 2.19485000  |
| C | -0.23178700 | -0.84068400 | -1.20095600 |
| H | 0.60259500  | 0.99734800  | -1.94847400 |
| C | -0.76578800 | -1.50474400 | -0.09427300 |
| H | -1.27880300 | -1.34891700 | 1.99558800  |
| H | -0.16614600 | -1.34579500 | -2.15996400 |
| H | -1.10296700 | -2.53359500 | -0.18687600 |

Ester product of rxn between 36 and i

|   |             |             |             |
|---|-------------|-------------|-------------|
| C | -1.43512900 | 0.04320300  | 0.74752300  |
| O | -2.43778800 | 0.38168700  | 1.34294600  |
| O | -1.20931200 | 0.21226900  | -0.56632800 |
| C | -2.15809100 | 0.96805200  | -1.38666600 |
| C | -2.25910300 | 2.41373900  | -0.91515900 |
| H | -2.79924700 | 3.00302900  | -1.66495600 |
| H | -2.79109500 | 2.48556600  | 0.03562700  |
| H | -1.26000100 | 2.84622400  | -0.79451700 |
| C | -3.49818900 | 0.25125800  | -1.50196700 |
| H | -3.35039600 | -0.79466200 | -1.79227100 |
| H | -4.04783300 | 0.28187000  | -0.55939900 |
| H | -4.10153600 | 0.73663300  | -2.27788400 |
| H | -1.65994300 | 0.94647500  | -2.36040200 |
| C | -0.22029900 | -0.58557400 | 1.41394500  |
| H | 0.22502100  | -1.32331000 | 0.74057700  |
| H | -0.56253500 | -1.08893600 | 2.32109800  |
| C | 0.78120400  | 0.50376700  | 1.74908900  |
| C | 0.72234800  | 1.16172800  | 2.98297800  |
| C | 1.73634900  | 0.90877000  | 0.80872000  |

|   |             |            |             |
|---|-------------|------------|-------------|
| C | 1.61085500  | 2.19646900 | 3.27815900  |
| H | -0.02508200 | 0.86131800 | 3.71245200  |
| C | 2.62552500  | 1.94272600 | 1.10217200  |
| H | 1.77897000  | 0.41139800 | -0.15634800 |
| C | 2.56580600  | 2.58932400 | 2.33870300  |
| H | 1.55631900  | 2.69542100 | 4.24185700  |
| H | 3.36577200  | 2.24279800 | 0.36543600  |
| H | 3.25941400  | 3.39335500 | 2.56846500  |

Ester product of rxn between 36 and j

|   |             |             |             |
|---|-------------|-------------|-------------|
| C | -1.73882200 | -0.49808200 | 0.34474700  |
| O | -2.87518900 | -0.53705000 | 0.76790000  |
| O | -1.36919400 | 0.24736100  | -0.72012200 |
| C | -2.40898200 | 1.05386600  | -1.28391100 |
| C | -2.00912000 | 1.67383800  | -2.62387400 |
| C | -3.49030200 | 0.32611300  | -2.09142600 |
| H | -2.78503000 | 1.74418300  | -0.52718000 |
| H | -1.05846100 | 1.28838600  | -3.01438300 |
| H | -2.01506600 | 2.76811200  | -2.68135500 |
| H | -3.29983900 | -0.74717100 | -2.21639500 |
| H | -4.52625100 | 0.48329100  | -1.77414400 |
| O | -3.15604900 | 1.08425200  | -3.28094100 |
| C | -0.54965000 | -1.21781500 | 0.94926100  |
| H | -0.93558800 | -2.06133800 | 1.52696400  |
| H | 0.08937700  | -1.59841700 | 0.14760400  |
| C | 0.22881500  | -0.26385400 | 1.83731800  |
| C | 1.40583300  | 0.33969300  | 1.38267400  |
| C | -0.25417300 | 0.05879400  | 3.11160900  |
| C | 2.09733400  | 1.24174900  | 2.19264600  |
| H | 1.78173100  | 0.10024900  | 0.39142000  |
| C | 0.43490400  | 0.96125400  | 3.92147700  |
| H | -1.17400400 | -0.39912900 | 3.46583100  |
| C | 1.61363800  | 1.55467900  | 3.46410100  |
| H | 3.01376100  | 1.69914700  | 1.82996600  |
| H | 0.05198500  | 1.20019100  | 4.90979200  |
| H | 2.15219900  | 2.25565000  | 4.09565300  |

Ester product of rxn between 36 and k

|   |             |            |             |
|---|-------------|------------|-------------|
| C | -2.36643600 | 0.65094200 | 1.25415700  |
| O | -3.26387600 | 1.31023500 | 1.73151400  |
| O | -2.29038200 | 0.29479800 | -0.04710500 |
| C | -3.26984000 | 0.88508600 | -0.94263000 |
| H | -4.22522700 | 0.92677000 | -0.41509700 |
| C | -2.85118800 | 2.29350900 | -1.32455500 |

|   |             |             |             |
|---|-------------|-------------|-------------|
| C | -3.82488000 | 3.18645000  | -1.78540900 |
| C | -1.51666100 | 2.70740100  | -1.26395200 |
| C | -3.47166100 | 4.47521600  | -2.18126400 |
| H | -4.86387700 | 2.86930600  | -1.83216600 |
| C | -1.16430600 | 4.00037800  | -1.65601500 |
| H | -0.75442800 | 2.02892900  | -0.89901800 |
| C | -2.13791200 | 4.88686100  | -2.11660000 |
| H | -4.23788200 | 5.16069300  | -2.53294100 |
| H | -0.12525000 | 4.31127600  | -1.59374000 |
| H | -1.86269700 | 5.89351700  | -2.41895500 |
| C | -3.38660800 | -0.04546100 | -2.13063600 |
| C | -4.58764500 | -0.71514300 | -2.37719100 |
| C | -2.30026100 | -0.24813700 | -2.99094700 |
| C | -4.70754600 | -1.57685000 | -3.46985500 |
| H | -5.43182300 | -0.56290300 | -1.70938200 |
| C | -2.41481100 | -1.11442700 | -4.07565500 |
| H | -1.36804500 | 0.27845600  | -2.81047300 |
| C | -3.62033600 | -1.77950100 | -4.31956000 |
| H | -5.64764400 | -2.08971400 | -3.65319400 |
| H | -1.56589200 | -1.26749200 | -4.73628400 |
| H | -3.70982800 | -2.45031600 | -5.16951100 |
| C | -1.14476400 | 0.15258800  | 2.00652600  |
| H | -0.99350200 | -0.90868900 | 1.78718200  |
| H | -1.34168500 | 0.27128000  | 3.07457300  |
| C | 0.06253900  | 0.96010000  | 1.57013500  |
| C | 0.98252700  | 0.43864600  | 0.65403100  |
| C | 0.21438800  | 2.28069000  | 2.00990100  |
| C | 2.03999100  | 1.22197100  | 0.18863000  |
| H | 0.86342000  | -0.58090000 | 0.29738000  |
| C | 1.27064800  | 3.06493200  | 1.54663700  |
| H | -0.50800300 | 2.69771600  | 2.70662900  |
| C | 2.18585000  | 2.53800300  | 0.63259100  |
| H | 2.74864000  | 0.80461900  | -0.52148700 |
| H | 1.37491400  | 4.08864400  | 1.89497200  |
| H | 3.00840500  | 3.14811600  | 0.27005300  |

Ester product of rxn between 36 and 1

|   |             |            |             |
|---|-------------|------------|-------------|
| C | -1.65096700 | 0.01606500 | 0.86231000  |
| O | -2.63916700 | 0.21783600 | 1.53765500  |
| O | -1.61680400 | 0.08178800 | -0.48124800 |
| C | -2.82768800 | 0.52389300 | -1.15299900 |
| C | -2.94336300 | 2.05686500 | -1.07378500 |
| C | -2.74863600 | 0.04205300 | -2.59381200 |
| H | -3.67150400 | 0.05064600 | -0.64335500 |



|   |             |             |             |
|---|-------------|-------------|-------------|
| C | -3.70114100 | 2.63768700  | -2.28917300 |
| H | -1.92946800 | 2.47118800  | -1.02728700 |
| H | -3.44333200 | 2.32714900  | -0.13860400 |
| C | -4.07246300 | 0.35261700  | -3.32942000 |
| H | -1.90797400 | 0.54830500  | -3.08495200 |
| H | -2.53213500 | -1.03118400 | -2.61894400 |
| C | -4.74698300 | 1.64371800  | -2.80798500 |
| H | -2.99312600 | 2.86311700  | -3.09749200 |
| H | -4.17057300 | 3.58879800  | -2.01434600 |
| H | -4.76465900 | -0.49055700 | -3.21909800 |
| H | -3.86522900 | 0.44661200  | -4.40173900 |
| H | -5.43752900 | 1.39923700  | -1.98969100 |
| H | -5.35424300 | 2.09713500  | -3.59964600 |
| C | -0.26994500 | -0.28925400 | 1.41820000  |
| H | 0.22808800  | -1.01793300 | 0.77210600  |
| H | -0.39804200 | -0.72155300 | 2.41308100  |
| C | 0.53450300  | 0.99537900  | 1.48943000  |
| C | 0.50433700  | 1.78466700  | 2.64480200  |
| C | 1.26804000  | 1.43960400  | 0.38242900  |
| C | 1.20540500  | 2.99005900  | 2.69882000  |
| H | -0.07289300 | 1.45220300  | 3.50359600  |
| C | 1.96893300  | 2.64451700  | 0.43458200  |
| H | 1.28494800  | 0.83869000  | -0.52257100 |
| C | 1.94050500  | 3.42292300  | 1.59385400  |
| H | 1.17689600  | 3.59017900  | 3.60418000  |
| H | 2.53867600  | 2.97476800  | -0.42979100 |
| H | 2.48842100  | 4.36015600  | 1.63560600  |

Ester product of rxn between 36 and m

|   |             |             |             |
|---|-------------|-------------|-------------|
| C | -1.04857900 | 2.32056900  | -0.22813600 |
| O | -1.91385500 | 3.11062500  | 0.09129700  |
| O | -1.23989800 | 1.14997400  | -0.85645900 |
| C | -2.59137200 | 0.60864700  | -1.09448800 |
| C | -3.35903000 | 1.51958400  | -2.05242800 |
| H | -4.30828300 | 1.04519100  | -2.32577100 |
| H | -3.57039700 | 2.48728700  | -1.59511200 |
| H | -2.78267100 | 1.68001700  | -2.97029700 |
| C | -2.29801100 | -0.74248700 | -1.74380800 |
| H | -3.23486700 | -1.25958600 | -1.97588500 |
| H | -1.73542300 | -0.61113600 | -2.67414300 |
| H | -1.71010100 | -1.37492000 | -1.07036500 |
| C | -3.30878800 | 0.42315300  | 0.24296500  |
| H | -2.68522600 | -0.16107900 | 0.92850200  |
| H | -3.53911600 | 1.38264000  | 0.70899800  |

|   |             |             |             |
|---|-------------|-------------|-------------|
| H | -4.24610500 | -0.12113300 | 0.08346200  |
| C | 0.42898300  | 2.50159400  | 0.09145900  |
| H | 1.02804300  | 2.17234000  | -0.76260000 |
| H | 0.60516800  | 3.56575100  | 0.26340300  |
| C | 0.77224400  | 1.69027200  | 1.32644500  |
| C | 0.65254100  | 2.25843900  | 2.59990100  |
| C | 1.14860200  | 0.34598300  | 1.21591400  |
| C | 0.91736000  | 1.50194900  | 3.74236800  |
| H | 0.34813100  | 3.29757600  | 2.69388000  |
| C | 1.41380200  | -0.41159700 | 2.35660400  |
| H | 1.23005900  | -0.10576000 | 0.23123800  |
| C | 1.29955500  | 0.16462300  | 3.62376300  |
| H | 0.82438900  | 1.95774600  | 4.72433700  |
| H | 1.71089300  | -1.45202400 | 2.25599700  |
| H | 1.50834800  | -0.42462900 | 4.51235400  |

Amine product of rxn between 22 and a

|   |             |            |             |
|---|-------------|------------|-------------|
| C | -5.24579400 | 0.70644300 | -2.62821400 |
| C | -3.77819700 | 0.48344000 | -2.62829800 |
| H | -5.79400800 | 0.50203200 | -3.54634300 |
| H | -5.81864800 | 0.55439400 | -1.71596200 |
| H | -3.31519900 | 0.12543500 | -3.54626400 |
| H | -3.27636400 | 0.16828800 | -1.71596300 |
| N | -4.32108200 | 1.85084100 | -2.59569200 |
| H | -4.25783400 | 2.27037200 | -3.52279400 |

Amine product of rxn between 23 and a

|   |             |             |             |
|---|-------------|-------------|-------------|
| C | -1.15566900 | -0.48417500 | -0.13820000 |
| C | 1.15530600  | -0.48501000 | -0.13824200 |
| C | 0.77740700  | 1.00295000  | 0.08619500  |
| C | -0.77666400 | 1.00353500  | 0.08610800  |
| N | -0.00046400 | -1.29131700 | 0.28569800  |
| H | 1.32619000  | -0.67195700 | -1.20652300 |
| H | 1.19718300  | 1.65259000  | -0.68891000 |
| H | -1.19585600 | 1.65338300  | -0.68913900 |
| H | -1.32677500 | -0.67106500 | -1.20645500 |
| H | -0.00045400 | -1.32537000 | 1.30605700  |
| H | 2.05655900  | -0.79383300 | 0.39982600  |
| H | 1.16395900  | 1.35611100  | 1.04860400  |
| H | -1.16306400 | 1.35712600  | 1.04841900  |
| H | -2.05710700 | -0.79230300 | 0.39995700  |

Amine product of rxn between 11 and a

|   |             |             |            |
|---|-------------|-------------|------------|
| C | -8.89307200 | -0.87415100 | 0.68246700 |
|---|-------------|-------------|------------|

|   |              |             |             |
|---|--------------|-------------|-------------|
| C | -6.83760800  | 0.46510200  | 0.66854500  |
| C | -7.80829500  | 1.47951100  | 1.25669900  |
| C | -9.43358500  | 0.33078000  | -0.08282300 |
| H | -5.89300600  | 0.49760700  | 1.22753500  |
| H | -9.09167700  | 0.28851600  | -1.13002100 |
| H | -9.30877800  | -0.85897900 | 1.69918200  |
| H | -8.02005400  | 1.21848200  | 2.30564400  |
| H | -7.36601800  | 2.48101900  | 1.24634400  |
| H | -10.53028700 | 0.33158400  | -0.09135700 |
| H | -9.23787100  | -1.80147700 | 0.21317300  |
| H | -6.61343200  | 0.76802500  | -0.36759200 |
| N | -7.42127000  | -0.88606900 | 0.75334200  |
| H | -7.05271500  | -1.45323400 | -0.00467300 |
| O | -9.02319300  | 1.56492600  | 0.51108600  |

Amine product of rxn between 24 and a

|   |             |             |             |
|---|-------------|-------------|-------------|
| N | -1.06867700 | 0.07052900  | -0.04238800 |
| C | -2.14495200 | 0.82573600  | 0.61303900  |
| C | -1.67476200 | 2.23890900  | 0.94162700  |
| H | -0.77892100 | 2.20854200  | 1.57156000  |
| H | -1.42442500 | 2.79198200  | 0.02665400  |
| H | -2.45522800 | 2.80134000  | 1.46719700  |
| H | -0.86594500 | 0.49729900  | -0.94651200 |
| H | -1.39260700 | -0.87311300 | -0.25134500 |
| H | -3.07351400 | 0.88079800  | 0.01653100  |
| H | -2.40073700 | 0.30014300  | 1.54165600  |

Amine product of rxn between 25 and a

|   |             |             |             |
|---|-------------|-------------|-------------|
| N | 0.07064700  | -0.93620800 | -0.23871400 |
| C | 0.11951400  | 0.18769700  | -1.19165200 |
| H | -0.42268000 | -0.12048000 | -2.09301800 |
| H | 1.16705300  | 0.33087500  | -1.48057600 |
| C | -0.45232600 | 1.48992400  | -0.66637800 |
| C | -1.82178700 | 1.76514700  | -0.77831900 |
| C | 0.36315700  | 2.41278300  | 0.00156300  |
| C | -2.36491900 | 2.92884900  | -0.23278900 |
| H | -2.46576800 | 1.06123200  | -1.30181100 |
| C | -0.17468700 | 3.57845900  | 0.54895400  |
| H | 1.42979000  | 2.21599300  | 0.08874500  |
| C | -1.54175300 | 3.83902800  | 0.43415100  |
| H | -3.42854000 | 3.12870300  | -0.33261900 |
| H | 0.47326800  | 4.28565600  | 1.06005500  |
| H | -1.96199200 | 4.74750800  | 0.85671500  |
| H | -0.89884900 | -1.07875100 | 0.04652000  |

|   |            |             |            |
|---|------------|-------------|------------|
| H | 0.55846100 | -0.66047200 | 0.61431000 |
|---|------------|-------------|------------|

Amine product of rxn between 26 and a

|   |             |             |             |
|---|-------------|-------------|-------------|
| N | 0.35715800  | -1.08917100 | -0.42883200 |
| H | -0.35009100 | -1.82008600 | -0.50699000 |
| H | 1.22200400  | -1.51082000 | -0.76766800 |
| C | -0.00813100 | 0.03268800  | -1.29806200 |
| C | -1.30786600 | 0.71499700  | -0.85103500 |
| C | 1.00431600  | 1.18315800  | -1.22302800 |
| H | -0.11853700 | -0.26256300 | -2.35888600 |
| C | -1.26860100 | 2.10329500  | -1.52635700 |
| H | -1.27478800 | 0.81074700  | 0.24171500  |
| H | -2.20566700 | 0.13949600  | -1.10550500 |
| C | 0.24087000  | 2.40266300  | -1.78171000 |
| H | 1.93478600  | 0.97446800  | -1.76409700 |
| H | 1.26149100  | 1.33332900  | -0.16672500 |
| H | -1.81830100 | 2.08670700  | -2.47415400 |
| H | -1.74234100 | 2.86744500  | -0.90181400 |
| H | 0.42898500  | 2.51358400  | -2.85563300 |
| H | 0.56565600  | 3.33434100  | -1.30756400 |

Amine product of rxn between 27 and a

|   |             |             |             |
|---|-------------|-------------|-------------|
| N | 0.53243000  | -0.71581900 | 0.01359700  |
| H | -0.09363000 | -1.01185500 | -0.72647900 |
| H | 0.59178700  | -1.41788400 | 0.74214000  |
| C | 0.31267400  | 0.58427200  | 0.47606200  |
| C | -0.26650900 | 1.55497600  | -0.35994600 |
| C | 0.71971800  | 0.96489500  | 1.76675300  |
| C | -0.42933300 | 2.86472200  | 0.08572300  |
| H | -0.58407600 | 1.27379700  | -1.36153200 |
| C | 0.55251900  | 2.27760000  | 2.20208300  |
| H | 1.17118100  | 0.22393200  | 2.42270100  |
| C | -0.02293200 | 3.23953800  | 1.36858800  |
| H | -0.88123800 | 3.59792900  | -0.57752200 |
| H | 0.87323500  | 2.54813300  | 3.20489900  |
| H | -0.15311800 | 4.26131800  | 1.71219900  |

Amine product of rxn between 28 and a

|   |            |             |             |
|---|------------|-------------|-------------|
| N | 0.36693600 | -0.79734900 | -0.39895800 |
| C | 1.63222500 | -0.97322500 | 0.08852200  |
| O | 1.89389100 | -1.75350600 | 0.99274400  |
| O | 2.52005200 | -0.19605200 | -0.57530700 |
| C | 3.95858400 | -0.27348100 | -0.28524000 |
| C | 4.47579100 | -1.68295400 | -0.57638900 |

|   |             |             |             |
|---|-------------|-------------|-------------|
| H | 5.56774100  | -1.69918800 | -0.48740600 |
| H | 4.05533500  | -2.40803700 | 0.12190000  |
| H | 4.21319300  | -1.98137300 | -1.59752700 |
| C | 4.22702300  | 0.15643600  | 1.15755600  |
| H | 5.30778600  | 0.19955700  | 1.33294300  |
| H | 3.81466000  | 1.15476500  | 1.34271800  |
| H | 3.78339100  | -0.54577700 | 1.86439100  |
| C | 4.54941300  | 0.73474900  | -1.26961600 |
| H | 4.14088600  | 1.73516800  | -1.09164200 |
| H | 5.63726700  | 0.77957900  | -1.15419300 |
| H | 4.32218700  | 0.44784300  | -2.30176100 |
| C | -0.06762100 | 0.23633700  | -1.33213200 |
| H | -0.85311500 | -0.18829400 | -1.96623000 |
| H | 0.78262200  | 0.46672700  | -1.97676600 |
| C | -0.58302000 | 1.49367600  | -0.65625100 |
| C | -1.89023100 | 1.93654100  | -0.87753400 |
| C | 0.24366200  | 2.22713900  | 0.20635100  |
| C | -2.36755600 | 3.09273900  | -0.25473900 |
| H | -2.54046800 | 1.37207000  | -1.54225000 |
| C | -0.23010900 | 3.37885700  | 0.83112800  |
| H | 1.26103100  | 1.89082200  | 0.38217600  |
| C | -1.53833700 | 3.81594400  | 0.60208600  |
| H | -3.38670600 | 3.42313300  | -0.43639200 |
| H | 0.42143700  | 3.93898600  | 1.49651900  |
| H | -1.90673700 | 4.71404300  | 1.09009100  |
| H | -0.34191600 | -1.23965000 | 0.17122800  |

Amine product of rxn between 29 and a

|   |             |             |             |
|---|-------------|-------------|-------------|
| N | 1.48217400  | 0.41977800  | 0.20204200  |
| C | 1.06794600  | 1.59131300  | 0.95184900  |
| H | 1.59813700  | 1.63697900  | 1.90791900  |
| H | 1.28000200  | 2.51758200  | 0.40355600  |
| H | -0.00619700 | 1.52848800  | 1.14088100  |
| C | 2.79635300  | 0.15446200  | -0.03248800 |
| O | 3.69463400  | 0.87255100  | 0.40003600  |
| C | 3.07932100  | -1.09284800 | -0.85290400 |
| H | 3.68023400  | -1.78443300 | -0.25303800 |
| H | 2.17706300  | -1.61230300 | -1.19153600 |
| H | 3.67725500  | -0.81514800 | -1.72688200 |
| H | 0.77514800  | -0.17197200 | -0.20789500 |

Amine product of rxn between 30 and a

|   |             |             |             |
|---|-------------|-------------|-------------|
| N | -1.35343500 | 0.06179000  | -0.13260400 |
| C | -1.46264900 | -1.27676400 | -0.53912000 |

|   |             |             |             |
|---|-------------|-------------|-------------|
| O | -0.59493300 | -1.72689400 | -1.26861600 |
| C | -2.64121800 | -2.07834800 | -0.05443100 |
| H | -2.66009800 | -2.12485400 | 1.03805700  |
| H | -3.58282400 | -1.61469200 | -0.36159400 |
| H | -2.55836200 | -3.08238300 | -0.47432100 |
| C | -2.18055900 | 0.82588900  | 0.68824900  |
| O | -3.19577400 | 0.39500100  | 1.20664700  |
| C | -1.68851600 | 2.24756400  | 0.87007800  |
| H | -0.68709400 | 2.25713200  | 1.31650400  |
| H | -1.62844400 | 2.76267500  | -0.09599000 |
| H | -2.37974000 | 2.78304600  | 1.52216600  |
| H | -0.52979100 | 0.51467600  | -0.51554100 |

Amine product of rxn between 31 and a

|   |             |             |             |
|---|-------------|-------------|-------------|
| N | 0.38071400  | -0.84680100 | 0.67760400  |
| H | 0.79744800  | -1.34525400 | 1.45288500  |
| C | 0.25916100  | 0.52061200  | 0.88991500  |
| C | -0.64280900 | 1.31537400  | 0.15760500  |
| C | 1.08451200  | 1.15142300  | 1.84394300  |
| C | -0.70097400 | 2.69320700  | 0.37191600  |
| H | -1.29600600 | 0.86054600  | -0.57900300 |
| C | 1.01219300  | 2.52395800  | 2.04991800  |
| H | 1.78547200  | 0.54796800  | 2.41700500  |
| C | 0.11920100  | 3.31151400  | 1.31509700  |
| H | -1.40501800 | 3.28588500  | -0.20696600 |
| H | 1.65908800  | 2.98355300  | 2.79298400  |
| H | 0.06500100  | 4.38364700  | 1.47829200  |
| C | -0.63683600 | -1.59331000 | -0.03598600 |
| H | -0.37847800 | -2.65485800 | -0.00091800 |
| H | -1.64812200 | -1.46461500 | 0.38353100  |
| H | -0.66737600 | -1.29420700 | -1.09011700 |

Amine product of rxn between 32 and a

|   |             |             |             |
|---|-------------|-------------|-------------|
| N | -0.64264500 | 0.51931900  | -0.03540000 |
| S | -0.61815800 | -0.92107600 | 0.87746800  |
| O | -0.49250900 | -0.53487100 | 2.28356500  |
| O | -1.76921900 | -1.68374100 | 0.38652200  |
| C | 0.87962500  | -1.75740600 | 0.39317700  |
| C | 0.83301700  | -2.70077000 | -0.63396800 |
| C | 2.09045000  | -1.39758700 | 0.99084200  |
| C | 2.01866700  | -3.29579200 | -1.05863600 |
| H | -0.11814000 | -2.97054700 | -1.07996400 |
| C | 3.26457900  | -1.99868800 | 0.54752400  |
| H | 2.10868400  | -0.66470400 | 1.78888800  |

|   |             |             |             |
|---|-------------|-------------|-------------|
| C | 3.24842300  | -2.95519900 | -0.47849700 |
| H | 1.98923000  | -4.03837900 | -1.85140200 |
| H | 4.21004200  | -1.72325100 | 1.00701800  |
| C | 4.52456100  | -3.62108000 | -0.92482500 |
| H | 4.79928300  | -4.43482200 | -0.24065900 |
| H | 4.42318200  | -4.05302600 | -1.92530700 |
| H | 5.36096700  | -2.91392300 | -0.93855700 |
| C | 0.47734900  | 1.40043200  | 0.03825600  |
| C | 1.30866500  | 1.57546700  | -1.07387000 |
| C | 0.74028400  | 2.09092400  | 1.22709700  |
| C | 2.39195000  | 2.45023900  | -1.00198300 |
| H | 1.10645900  | 1.02141000  | -1.98695700 |
| C | 1.84240000  | 2.94156300  | 1.29793300  |
| H | 0.08401600  | 1.95068000  | 2.07751400  |
| C | 2.66758900  | 3.12920000  | 0.18627900  |
| H | 3.02840900  | 2.58800000  | -1.87135300 |
| H | 2.04694100  | 3.47269000  | 2.22315700  |
| H | -0.91184700 | 0.28655400  | -0.98990400 |
| H | 3.51745000  | 3.80284000  | 0.24494500  |

Amine product of rxn between 33 and a

|   |             |             |             |
|---|-------------|-------------|-------------|
| N | -1.09432800 | 0.87510500  | 0.14235000  |
| C | -1.25429100 | -0.52511800 | 0.23331400  |
| C | -0.64497800 | -1.19693800 | 1.30368600  |
| C | -1.95308600 | -1.26437000 | -0.73067000 |
| C | -0.74762600 | -2.58133100 | 1.41542600  |
| H | -0.10062500 | -0.62388100 | 2.04962900  |
| C | -2.07089400 | -2.64783400 | -0.59770900 |
| H | -2.38266900 | -0.76440700 | -1.59051700 |
| C | -1.47051700 | -3.31406800 | 0.47124000  |
| H | -0.26948100 | -3.08678500 | 2.24973000  |
| H | -2.61999900 | -3.20754200 | -1.34970000 |
| H | -1.55764100 | -4.39247400 | 0.56375000  |
| C | -1.98635800 | 1.87280000  | -0.19864400 |
| O | -1.61771400 | 3.04159000  | -0.18190800 |
| C | -3.40253100 | 1.48331800  | -0.56655400 |
| H | -3.46864100 | 1.25248000  | -1.63602800 |
| H | -3.76387500 | 0.61517100  | -0.00945800 |
| H | -4.04271500 | 2.34560500  | -0.36954500 |
| H | -0.22034200 | 1.25088000  | 0.49437200  |

Amine product of rxn between 37 and a

|   |             |             |            |
|---|-------------|-------------|------------|
| N | -0.02539400 | 0.43625500  | 0.26801100 |
| C | -0.35275900 | -0.89468600 | 0.50547000 |

|   |             |             |             |
|---|-------------|-------------|-------------|
| O | -1.07991100 | 1.89690100  | -1.61014100 |
| O | 0.43704300  | -1.75253200 | 0.84776300  |
| C | -2.54200600 | -2.24003300 | 0.40986300  |
| C | -1.81496800 | -1.06311100 | 0.26811000  |
| C | -2.45796400 | 0.10851500  | -0.13186100 |
| C | -3.81687200 | 0.16309900  | -0.40126300 |
| C | -4.54206600 | -1.02491500 | -0.25714500 |
| C | -3.91318400 | -2.20973400 | 0.14292900  |
| H | -2.04148800 | -3.15076300 | 0.72114700  |
| H | -4.29917000 | 1.08428200  | -0.71033600 |
| H | -5.60850700 | -1.02386000 | -0.45935900 |
| H | -4.49992000 | -3.11690200 | 0.24729600  |
| S | -1.30154500 | 1.46238400  | -0.22994200 |
| O | -1.55878700 | 2.47276600  | 0.79711000  |
| H | 0.92530700  | 0.78589100  | 0.33402500  |

Amine product of rxn between 38 and a

|   |             |             |             |
|---|-------------|-------------|-------------|
| N | -0.18893000 | 0.56123100  | 0.17373200  |
| C | -0.62091800 | -0.70097700 | 0.59980900  |
| C | -1.21571200 | 1.35085500  | -0.36015800 |
| O | -1.09278400 | 2.47734700  | -0.79722300 |
| O | 0.07780100  | -1.56302200 | 1.09372100  |
| C | -3.02379600 | -1.72142400 | 0.52409000  |
| C | -2.08583600 | -0.72286200 | 0.30947000  |
| C | -2.44110600 | 0.50257400  | -0.26325000 |
| C | -3.74736200 | 0.77398200  | -0.64163200 |
| C | -4.70209000 | -0.22908300 | -0.42861900 |
| C | -4.34616800 | -1.45642400 | 0.14456300  |
| H | -2.74017200 | -2.66991100 | 0.96874400  |
| H | -4.01491000 | 1.72730500  | -1.08591500 |
| H | -5.73550600 | -0.05402500 | -0.71243600 |
| H | -5.10901000 | -2.21423100 | 0.29607200  |
| H | 0.77307300  | 0.87019500  | 0.23807100  |

Amine product of rxn between 39 and a

|   |             |             |             |
|---|-------------|-------------|-------------|
| N | -1.21043600 | 0.17775800  | 0.11754900  |
| C | -1.46124700 | -1.07255000 | 0.67300100  |
| C | -2.26072100 | 0.72224600  | -0.61354800 |
| C | -2.88109700 | -1.46177700 | 0.27216100  |
| C | -3.40855500 | -0.28170500 | -0.56018900 |
| H | -2.84173600 | -2.40158200 | -0.28688600 |
| H | -4.27995000 | 0.20676400  | -0.11360100 |
| O | -2.23520000 | 1.79726300  | -1.17483300 |
| O | -0.67468400 | -1.70677900 | 1.34400400  |



|   |             |             |             |
|---|-------------|-------------|-------------|
| H | -3.68181500 | -0.55849900 | -1.58277400 |
| H | -3.46412400 | -1.64965300 | 1.17864500  |
| H | -0.32444700 | 0.65702400  | 0.23658900  |

Amine product of rxn between 40 and a

|   |             |             |             |
|---|-------------|-------------|-------------|
| N | -0.99624000 | 0.00401400  | 0.29973900  |
| C | -1.52953700 | -1.25768700 | 0.03467000  |
| C | -1.53314100 | 1.25824100  | 0.00760100  |
| C | -2.87188100 | -1.26491800 | -0.66833900 |
| C | -2.87436500 | 1.24591100  | -0.69753600 |
| H | -2.67069100 | -1.34386600 | -1.74650100 |
| H | -3.39532900 | 2.16721700  | -0.42490300 |
| O | -0.92334000 | 2.27072800  | 0.30129800  |
| O | -0.91553800 | -2.26182700 | 0.34768300  |
| H | -2.67162000 | 1.29914400  | -1.77697100 |
| H | -3.39033500 | -2.18058700 | -0.37285300 |
| C | -3.69428800 | -0.00681500 | -0.37904800 |
| H | -3.99103400 | 0.00520200  | 0.67690200  |
| H | -4.61438700 | -0.01457000 | -0.97124700 |
| H | -0.09005300 | 0.01009600  | 0.76069800  |
